# Supplementary material
Source: PubMed Central journal article supplement (PMC4410914)
Supplement: sb500267d_si_001.pdf [file sb500267d_si_001.pdf]

## Supporting Information for

### Assessing the combinatorial potential of the RiPP cyanobactin *tru* pathway

Duane E. Ruffner,\* Eric W. Schmidt, and John R. Heemstra

#### Table of Contents:

|                                                                                               |    |
|-----------------------------------------------------------------------------------------------|----|
| Table S1. Successfully expressed mutants described in this study...                           | 2  |
| Table S2. Sequences tested but for which products could not be detected...                    | 5  |
| Table S3A. Analysis of selectivity data and total number of mutations per position...         | 9  |
| Table S3B. Percent success rate for each amino acid...                                        | 10 |
| Table S3C. Percent acceptance of each amino acid at each position, when rules are followed... | 11 |
| Table S4. Mass spectral analysis of libraries...                                              | 12 |
| S4A. XXIAPFC library...                                                                       | 13 |
| S4B. TSIXPXC library...                                                                       | 26 |
| S4C. TSXXPXC library...                                                                       | 65 |
| S4D. XSXXPXC library...                                                                       | 95 |

**Table S1.** Successfully expressed mutants described in this study. \*duplicate sequences obtained and correctly expressed twice but not counted twice in statistics.

| <b>TSIAPFC</b>    |                   |                   |                |
|-------------------|-------------------|-------------------|----------------|
| <u>XXIAPFC</u>    | <u>TSIXPXC</u>    | <u>TSXXPFC</u>    | <u>XSXXPXC</u> |
| #sequences:       | #sequences:       | #sequences:       | #sequences:    |
| 41 (37<br>unique) | 45 (42<br>unique) | 64 (63<br>unique) | 9              |
| APIAPFC           | TSIAPNC           | TSAEPFC           | DSEVPTC        |
| EFIAPFC           | TSIAPSC           | TSAPPFC           | ESADPLC        |
| EGIAPFC           | TSIAPVC           | TSASPFC           | HSTIPLC        |
| FGIAPFC           | TSIAPYC           | TSAVPFC           | QSWGPTC        |
| GAIAPFC           | TSIDPIC           | TSDGPFPC          | TSPYPLC        |
| GEIAPFC           | TSIFPWC           | TSDLPFC           | VSEAPLC        |
| GFIAPFC           | TSIGPLC           | TSDQPFC           | WSNLPQC        |
| GGIAPFC           | TSIGPTC           | TSEFPFC           | YSTIPMC        |
| GIIAPFC           | TSIGPVC*          | TSEKPFPC          | YSTTPLC        |
| GLIAPFC           | TSIGPVC*          | TSEQPFC           |                |
| GPIAPFC           | TSIGPYC           | TSESPFC           |                |
| GVIAPFC           | TSIHPLC           | TSETPFC           |                |
| GYIAPFC           | TSIHPVC           | TSFLPFC           |                |
| HDIAPFC           | TSIIPAC           | TSFSPFC           |                |
| HLIAPFC*          | TSILPLC           | TSFVPFC           |                |
| HLIAPFC*          | TSILPSC           | TSGSPFC           |                |
| HSIAPFC*          | TSILPTC           | TSHGPFPC          |                |
| HSIAPFC*          | TSILPWC           | TSHPPFC           |                |
| ISIAPFC           | TSINPWC           | TSIHPFC           |                |
| LAIAPFC           | TSIPPLC           | TSIIPFC           |                |
| LDIAPFC           | TSIPPVC           | TSIQPFC           |                |
| NLIAPFC           | TSIPPYC           | TSIRPFC           |                |
| NVIAPFC           | TSIQPLC           | TSISPFC           |                |
| NYIAPFC           | TSIQPNC           | TSKQPFC           |                |
| PLIAPFC           | TSIQPQC           | TSKVPFC           |                |
| QLIAPFC           | TSISPIC           | TSLMPFC           |                |
| SDIAPFC           | TSISPLC           | TSLNPFC           |                |
| SNIAPFC*          | TSISPNC           | TSLPPFC           |                |
| SNIAPFC*          | TSISPOC           | TSLSPFC           |                |
| STIAPFC           | TSISPTC           | TSLVPFC           |                |
| SVIAPFC           | TSITPLC           | TSMEPFC           |                |
| SYIAPFC           | TSITPMC           | TSMTPFC           |                |
| TNIAPFC           | TSITPQC           | TSMYPFC           |                |
| TQIAPFC*          | TSITPVC           | TSNSPFC           |                |
| TQIAPFC*          | TSIVPAC           | TSNVPFC           |                |
| VLIAPFC           | TSIVPHC           | TSQAPFC           |                |
| VYIAPFC           | TSIVPLC*          | TSQDPFC           |                |
| WGIAPFC           | TSIVPLC*          | TSQEPFC           |                |
| WSIAPFC           | TSIVPVC           | TSQGPFC           |                |

YAIAPFC  
YQIAPFC

TSIVPWC\*  
TSIVPWC\*  
TSIWPLC  
TSIWPVC  
TSIYPFC  
TSIYPSC

TSRDPFC  
TSRFPFC  
TSRQPFC  
TSRSPFC  
TSRTPFC  
TSRVVFC  
TSRYVFC  
TSSIPFC  
TSSLVFC  
TSSSPFC\*  
TSSSPFC\*  
TSTFPFC  
TSTNPFC  
TSTPPFC  
TSTSPFC  
TSTTPFC  
TSVDPFC  
TSVMPFC  
TSVPPFC  
TSVQVFC  
TSVRVFC  
TSVTVFC  
TSVWVFC  
TSWNPFC  
TSWSPFC

Mutations  
accepted(#)

Position 7

A(1)  
E(2)  
F(1)  
G(9)  
H(3)  
I(1)  
L(2)  
N(3)  
P(1)  
Q(1)  
S(5)  
T(2)  
V(2)  
W(2)  
Y(2)  
Position 6  
A(3)  
D(3)  
E(1)  
F(2)

Position 4

A(4)  
D(1)  
F(1)  
G(4)  
H(2)  
I(1)  
L(4)  
N(1)  
P(3)  
Q(3)  
S(5)  
T(4)  
V(5)  
W(2)  
Y(2)  
Position 2  
A(2)  
F(1)  
H(1)  
I(2)

Position 5

A(4)  
D(3)  
E(5)  
F(3)  
G(1)  
H(2)  
I(5)  
K(2)  
L(5)  
M(3)  
N(2)  
Q(4)  
R(7)  
S(3)  
T(5)  
V(7)  
W(2)  
Position 4  
A(1)  
D(3)

Position 7

D(1)  
E(1)  
H(1)  
Q(1)  
T(2)  
V(1)  
W(1)  
Y(2)  
Position 5  
A(1)  
E(2)  
N(1)  
P(1)  
T(3)  
W(1)  
Position 4  
A(1)  
D(1)  
G(1)  
I(2)

G(4)  
I(1)  
L(6)  
N(2)  
P(2)  
Q(2)  
S(3)  
T(1)  
V(3)  
Y(4)

L(9)  
M(1)  
N(3)  
Q(3)  
S(3)  
T(3)  
V(7)  
W(4)  
Y(3)

E(3)  
F(3)  
G(3)  
H(1)  
I(2)  
K(1)  
L(3)  
M(2)  
N(3)  
P(5)  
Q(6)  
R(2)  
S(11)  
T(5)  
V(6)  
W(1)  
Y(2)

L(1)  
T(1)  
V(1)  
Y(1)  
Position 2  
L(5)  
M(1)  
Q(1)  
T(2)



**Table S2.** Sequences tested but for which products could not be detected. The rules here are: no Cys any position; no Arg/Lys in positions 7,6, or 2; no Asp/Glu/Pro in position 2.

**TSIAPFC**

XXIAPFC

#sequences:

31

TSIXPXC

#sequences:

23

TSXXPFC

#sequences:

56 (55  
unique)

XSXXPXC

#sequences:

56

Follow rules

HHIAPFC

MNIAPFC

MSIAPFC

DIIAPFC

ITIAPFC

NYIAPFC

PIIAPFC

PNIAPFC

QPIAPFC

Break rules

DRIAPFC

VRIAPFC

RPIAPFC

CRIAPFC

RTIAPFC

RRIAPFC

RGIAPFC

REIAPFC

ARIAPFC

TRIAPFC

REIAPFC

IKIAPFC

LKIAPFC

KCIAPFC

SKIAPFC

KHIAPFC

DKIAPFC

KQIAPFC

IKIAPFC

CLIAPFC

CGIAPFC

MCIAPFC

Follow rules

TSIKPFC

TSIRPFC

TSIRPGC

TSIRPLC

TSISPGC

TSIMPGC

TSIDPFC

TSIGPFC

Break rules

TSIPPFC

TSISPFC

TSIHPFC

TSIRPFC

TSIFPFC

TSITPFC

TSILPFC

TSIQPFC

TSIRPFC

TSIGPFC

TSIAPEC

TSIVPFC

TSILPFC

TSILPFC

TSIVPFC

Follow rules

TSGYPFC

TSRKPFC

TSRAPFC

TSRPPFC

TSLRPFC

TSRRPFC

TSRGPFC

TSRHPFC

TSRGPFC

TSRDPFC

TSRHPFC

TSRFPFC

TSRSPFC

TSQRPFC

TSHRPFC

TSMRPFC

TSYRPFC

TSHTPFC

TSHHPFC

TSHPPFC

TSHLPFC

TSHVPFC

TSKVPFC

TSKLPFC

TSKHPFC

TSKFPFC

TSKGPFC

TSTKPFC\*

TSTKPFC\*

TSLKPFC

TSNKPFC

TSPWPFC

TSPLPFC

TSPIPFC

TSPGPFC

TSPTPFC

TSPSPFC

TSTDPFC

Follow rules

SSENPTC

DSNSPFC

SSMGPFC

ASAHPTC

NSVHPFC

YSFSPFC

NSYEPLC

FSGLPHC

GSNPPFC

GSNYPFC

SSSGPFC

ASGLPFC

WSNNPFC

PSPAPFC

NSPAPFC

Break rules

ESWCPLC

CSALPLC

TSECLFC

KSKMPFC

KSHPPFC

KSLKPFC

ISSKPFC

ISAIPFC

NSDWPFC

TSTKPFC

GSTKPFC

DSFKPLC

NSKPPFC

VSKVPLC

ASEKPLC

RSKVPFC

RSTAPFC

SSRQPTC

WSRHPPC

ASGVPRC

RSPEPFC

|                    |         |
|--------------------|---------|
| TSSDPFC            | YRSRPTC |
| TSNDPFC            | ASRTPLC |
| TSDWPFC            | KSLQPRC |
| TSFEPFC            | RSTVPAC |
| TSFIPFC            | MSSRPSC |
| TSQSPFC            | ASRFPGC |
| TSNMPFC            | YSRHPTC |
| TSGQPFC            | ASRRPDC |
| TSGGPFC            | SSGRPVC |
|                    | QSSLPGC |
| <u>Break rules</u> | TSSRPGC |
| TSRCPFC            | YNSSPGC |
| TSDCPFC            | HSSNPEC |
| TSCDPFC            | NSSYPEC |
| TSCLPFC            | GSTNPEC |
| TSECPFC            | TSPGPDC |
| TSCVPFC            | ISDWPPC |
| TSCGPFC            | LSDYPPC |
| TSVCPFC            | WSLAPPC |
| TSSCPFC            | GSYEPPC |
| TSPCPFC            |         |

Mutations not  
found / break  
rules (#)

| Position 7 | Position 4 | Position 5 | Position 7 |
|------------|------------|------------|------------|
| A(1)       | A(1)       | C(4)       | A(5)       |
| C(3)       | F(1)       | D(1)       | C(1)       |
| D(2)       | G(1)       | E(1)       | D(1)       |
| I(2)       | H(1)       | P(1)       | E(1)       |
| K(3)       | L(3)       | R(1)       | G(3)       |
| L(1)       | M(1)       | S(1)       | H(1)       |
| M(1)       | P(1)       | V(1)       | I(3)       |
| Q(1)       | Q(1)       | Position 4 | K(4)       |
| R(6)       | R(2)       | C(6)       | M(1)       |
| S(1)       | S(1)       | D(1)       | N(3)       |
| T(1)       | T(1)       | G(1)       | Q(1)       |
| V(1)       | V(2)       | H(4)       | R(4)       |
| Position 6 | Position 2 | L(1)       | S(2)       |
| C(2)       | C(5)       | V(1)       | T(4)       |
| E(2)       | D(3)       |            | V(1)       |
| G(2)       | E(1)       |            | W(2)       |
| H(1)       | P(5)       |            | Y(3)       |
| K(5)       | R(2)       |            | Position 5 |
| L(1)       |            |            | A(2)       |
| P(1)       |            |            | D(3)       |
| Q(1)       |            |            | E(2)       |
| R(6)       |            |            | F(1)       |
| T(1)       |            |            | G(2)       |

H(1)  
K(4)  
L(3)  
N(1)  
P(2)  
R(7)  
S(6)  
T(5)  
W(1)  
Y(1)  
Position 4  
A(2)  
C(2)  
E(2)  
F(1)  
G(1)  
H(2)  
I(1)  
K(6)  
L(2)  
M(1)  
N(2)  
P(2)  
Q(2)  
R(4)  
S(2)  
T(1)  
V(4)  
W(1)  
Y(2)  
Position 2  
A(2)  
D(2)  
G(4)  
H(2)  
I(3)  
K(2)  
L(5)  
M(1)  
P(5)  
R(2)  
S(4)  
T(3)  
V(1)  
W(1)  
Y(1)

Mutations not  
found /  
follow rules

(#)

|            |            |            |            |
|------------|------------|------------|------------|
| Position 7 | Position 4 | Position 5 | Position 7 |
| D(1)       | D(1)       | D(1)       | A(2)       |
| H(1)       | G(1)       | F(2)       | D(1)       |
| I(1)       | K(1)       | G(3)       | F(1)       |
| M(2)       | M(1)       | H(6)       | G(2)       |
| N(1)       | R(3)       | K(5)       | N(3)       |
| P(2)       | S(1)       | L(2)       | P(1)       |
| Q(1)       | Position 2 | M(1)       | S(3)       |
| Position 6 | G(3)       | N(3)       | W(1)       |
| H(1)       | L(1)       | P(6)       | Y(1)       |
| I(2)       | S(1)       | Q(2)       | Position 5 |
| N(2)       | T(1)       | R(11)      | A(1)       |
| P(1)       | W(2)       | S(1)       | E(1)       |
| S(1)       |            | T(2)       | F(1)       |
| T(1)       |            | Y(1)       | G(2)       |
| Y(1)       |            | Position 4 | M(1)       |
|            |            | A(1)       | N(4)       |
|            |            | D(4)       | P(2)       |
|            |            | E(1)       | S(1)       |
|            |            | F(2)       | V(1)       |
|            |            | G(5)       | Y(1)       |
|            |            | H(4)       | Position 4 |
|            |            | I(2)       | A(2)       |
|            |            | K(4)       | E(1)       |
|            |            | L(3)       | G(2)       |
|            |            | M(1)       | H(2)       |
|            |            | P(2)       | L(2)       |
|            |            | Q(1)       | N(1)       |
|            |            | R(6)       | P(1)       |
|            |            | S(3)       | S(2)       |
|            |            | T(2)       | Y(1)       |
|            |            | V(2)       | Position 2 |
|            |            | W(2)       | H(1)       |
|            |            | Y(1)       | L(3)       |
|            |            |            | M(1)       |
|            |            |            | Q(2)       |
|            |            |            | S(5)       |
|            |            |            | T(1)       |
|            |            |            | W(1)       |
|            |            |            | Y(1)       |

**Table S3A.** Summary of selectivity data. Numbers “a,b,c” indicate: a, the total number of times that amino acid mutation was observed in products; b, the total number of times the amino acid mutation was observed in a sequence that did not lead to an observable product, when the rules were followed; c, the total number of times the amino acid mutation was observed in a sequence that did not lead to an observable product, when the rules were broken. Positions are indicated by numbers in the top row; if only the number is shown, this number results only from the double mutant library. If they are followed by “(all)” this is the quadruple + double mutant libraries combined. For example, for the amino acid in position 7, Ala was observed a total of once in a product, although it was also seen twice in sequences that followed the rules without leading to a product. It was seen six times in this position in rule breaking sequences. In position 6, “na” refers to the fact that the quadruple mutant library was not varied in that position.

| pos | 7     | 7(all) | 6     | 6(all) | 5      | 5(all) | 4      | 4(all) | 2     | 2(all) |
|-----|-------|--------|-------|--------|--------|--------|--------|--------|-------|--------|
| A   | 1,0,1 | 1,2,6  | 3,0,0 | na     | 4,0,0  | 5,1,2  | 5,1,1  | 6,3,3  | 2,0,0 | 2,0,2  |
| C   | 0,0,3 | 0,0,4  | 0,0,2 | na     | 0,0,4  | 0,0,4  | 0,0,6  | 0,0,8  | 0,0,5 | 0,0,5  |
| D   | 0,1,2 | 1,2,3  | 3,0,0 | na     | 3,1,1  | 3,1,4  | 4,5,1  | 5,5,1  | 0,0,3 | 0,0,5  |
| E   | 2,0,0 | 3,0,1  | 1,0,2 | na     | 5,0,1  | 7,1,3  | 3,1,0  | 3,2,2  | 0,0,1 | 0,0,1  |
| F   | 1,0,0 | 1,1,0  | 2,0,0 | na     | 3,2,0  | 3,3,1  | 4,2,1  | 4,2,2  | 1,0,0 | 1,0,0  |
| G   | 9,0,0 | 9,2,3  | 4,0,2 | na     | 1,3,0  | 1,5,2  | 7,6,2  | 8,8,3  | 0,3,0 | 0,3,4  |
| H   | 3,1,0 | 4,1,1  | 0,1,1 | na     | 2,6,0  | 2,6,1  | 3,4,5  | 3,6,7  | 1,0,0 | 1,1,2  |
| I   | 1,1,2 | 1,1,5  | 1,2,0 | na     | 5,0,0  | 5,0,0  | 3,2,0  | 5,2,1  | 2,0,0 | 2,0,3  |
| K   | 0,0,3 | 0,0,7  | 0,0,5 | na     | 2,5,0  | 2,5,4  | 1,5,0  | 1,5,6  | 0,0,0 | 0,0,2  |
| L   | 2,0,1 | 2,0,1  | 6,0,1 | na     | 5,2,0  | 5,2,3  | 7,3,4  | 8,5,6  | 9,1,0 | 14,4,5 |
| M   | 0,2,1 | 0,2,2  | 0,0,0 | na     | 3,1,0  | 3,2,0  | 2,2,1  | 2,2,2  | 1,0,0 | 2,1,1  |
| N   | 3,1,0 | 3,4,3  | 2,2,0 | na     | 2,3,0  | 3,7,1  | 4,0,0  | 4,1,2  | 3,0,0 | 3,0,0  |
| P   | 1,2,0 | 1,3,0  | 2,1,1 | na     | 0,6,1  | 1,8,3  | 8,2,1  | 8,3,3  | 0,0,5 | 0,0,10 |
| Q   | 1,1,1 | 2,1,2  | 2,0,1 | na     | 4,2,0  | 4,2,0  | 9,1,1  | 9,1,3  | 3,0,0 | 4,2,0  |
| R   | 0,0,6 | 0,0,10 | 0,0,6 | na     | 7,11,1 | 7,11,7 | 2,9,2  | 2,9,6  | 0,0,2 | 0,0,4  |
| S   | 5,0,1 | 5,3,3  | 3,1,0 | na     | 3,1,1  | 3,2,7  | 16,4,1 | 16,6,3 | 3,1,0 | 3,6,4  |
| T   | 2,0,1 | 4,0,5  | 1,1,1 | na     | 5,2,0  | 8,2,5  | 9,2,1  | 10,2,2 | 3,1,0 | 5,2,3  |
| V   | 2,0,1 | 3,0,2  | 3,0,0 | na     | 7,0,1  | 7,1,1  | 11,2,3 | 12,2,7 | 7,0,0 | 7,0,1  |
| W   | 2,0,0 | 3,1,2  | 0,0,0 | na     | 2,0,0  | 3,0,1  | 3,2,0  | 3,2,1  | 4,2,0 | 4,3,1  |
| Y   | 2,0,0 | 4,1,3  | 4,1,0 | na     | 0,1,0  | 0,1,1  | 4,1,0  | 5,2,2  | 3,0,0 | 3,1,1  |

**Table S3B.** Percent success rate for each amino acid. Amino acids behave similarly as groups, within the limitations of the number of sequences screened, where some amino acids co-occur with disfavored amino acids more frequently at random. For example, D occurs in 12 rule-breaking sequences, while E occurs in 9. Some amino acids, such as Asp/Glu or Arg/Lys, share specific forbidden positions, making them similar.

| Amino acid | # successful /<br># appearances | Success rate |
|------------|---------------------------------|--------------|
| A          | 17/37                           | 46%          |
| I          | 14/29                           | 48%          |
| L          | 35/59                           | 59%          |
| V          | 32/44                           | 73%          |
| N          | 17/35                           | 49%          |
| Q          | 21/33                           | 64%          |
| S          | 30/65                           | 46%          |
| T          | 28/51                           | 55%          |
| F          | 11/20                           | 55%          |
| H          | 10/37                           | 27%          |
| W          | 13/25                           | 52%          |
| Y          | 16/30                           | 53%          |
| D          | 12/32                           | 38%          |
| E          | 14/26                           | 54%          |
| G          | 22/54                           | 41%          |
| M          | 7/19                            | 37%          |
| P          | 12/45                           | 27%          |
| K          | 3/37                            | 8%           |
| R          | 9/62                            | 15%          |
| C          | 0/23                            | 0%           |

**Table S3C.** Percent acceptance of each amino acid at each position, when rules are followed. Note that -1 indicates a forbidden position, while -2 indicates that no sequence encoded the amino acid in that position. These percentages further reinforce the grouping of amino acids by type.

|   | 7     | 6     | 5     | 4    | 2     |
|---|-------|-------|-------|------|-------|
| A | 33.3  | 100.0 | 83.3  | 66.7 | 100.0 |
| D | 50.0  | 100.0 | 75.0  | 50.0 | -1.0  |
| E | 100.0 | 100.0 | 87.5  | 60.0 | -1.0  |
| F | 50.0  | 100.0 | 50.0  | 66.7 | 100.0 |
| G | 81.8  | 100.0 | 33.3  | 50.0 | 0.0   |
| H | 80.0  | 0.0   | 25.0  | 33.3 | 50.0  |
| I | 50.0  | 50.0  | 100.0 | 71.4 | 100.0 |
| K | -1.0  | -1.0  | 28.6  | 16.7 | -1.0  |
| L | 100.0 | 100.0 | 50.0  | 61.5 | 77.8  |
| M | 0.0   | -2.0  | 60.0  | 50.0 | 66.7  |
| N | 42.9  | 50.0  | 30.0  | 80.0 | 100.0 |
| P | 40.0  | 66.7  | 11.1  | 72.7 | -1.0  |
| Q | 66.7  | 100.0 | 66.7  | 90.0 | 66.7  |
| R | -1.0  | -1.0  | 38.9  | 18.2 | -1.0  |
| S | 62.5  | 75.0  | 60.0  | 72.7 | 33.3  |
| T | 100.0 | 50.0  | 80.0  | 83.3 | 71.4  |
| V | 100.0 | 100.0 | 87.5  | 85.7 | 100.0 |
| W | 75.0  | -2.0  | 100.0 | 66.7 | 57.1  |
| Y | 80.0  | 80.0  | 0.0   | 85.7 | 75.0  |

**Table S4.** Mass spectral analysis of libraries. These represent extracted ion chromatograms for synthesized compounds. The precursor peptide was sequenced, and the sequence was used to generate a table of possible cyanobactin derivatives that might be made. The resulting  $m/z$  values were manually sought. When found, adjacent spectra were examined to ensure that the peak was specifically correlated with the compound. Often, two isobaric peaks are present. These are either: 1) regioisomers of isoprenylation; or 2) D and L isomers adjacent to thiazoline. For the second possibility, an identical pattern is seen with the standard, trunkamide. In some cases, the products are not prenylated, while in others products are prenylated as indicated. Finally, isoprene is readily lost by fragmentation, so that searching for the base mass of a compound (without isoprene) often leads to identification of all of the prenylated variants.



## S4A. XXIAPFC

Top: Representative control spectrum for  $m/z = 943$ , patellin 3 standard. This standard is an internal control that is present in all runs shown below. If patellin 3 is found in an extract, it is highly likely that the new compound will also be found, while if patellin 3 is absent the new compound is universally absent in runs.

F:\Other...\data\XXIAPFC\_112311\1A

11/23/2011 1:11:14 PM

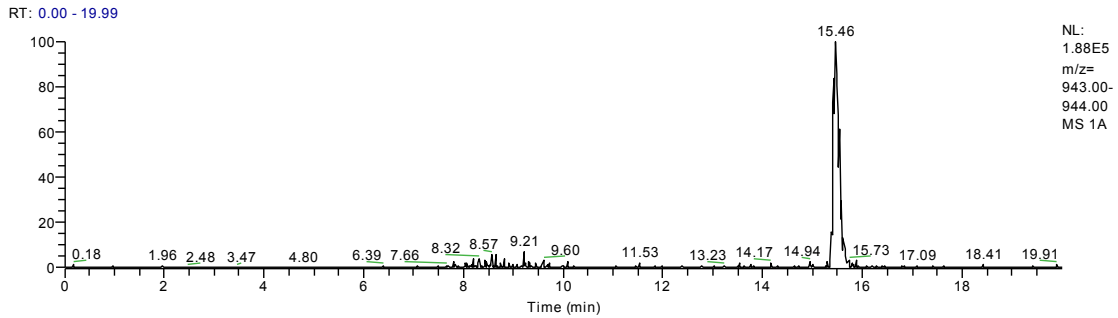

1A #892-908 RT: 15.30-15.58 AV: 17 NL: 1.45E5  
T: + c ESI Q1MS [500.000-1200.000]

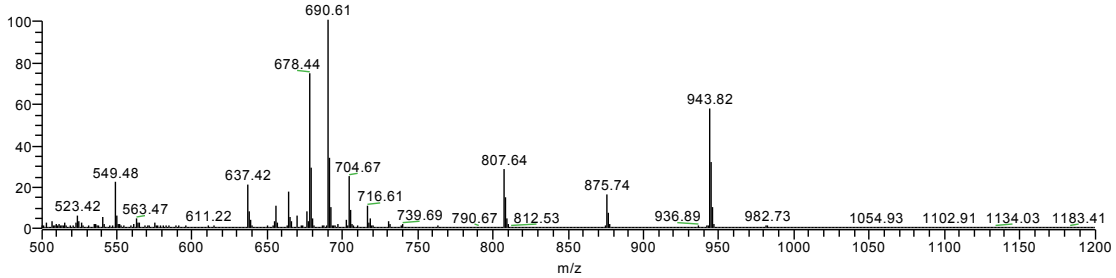

| Sequence | m/z | Extracted ion chromatogram and mass spectrum at time point                                                                                                                                                                                                                                     |
|----------|-----|------------------------------------------------------------------------------------------------------------------------------------------------------------------------------------------------------------------------------------------------------------------------------------------------|
| GPIAPFC  | 688 | <p>F:\Other...\data\XXIAPFC_112311\1A 11/23/2011 1:11:14 PM</p> <p>RT: 0.00 - 19.99</p> <p>10.62</p> <p>NL: 6.93E5<br/>m/z= 668.00-669.00<br/>MS 1A</p> <p>Time (min)</p> <p>1A #606-632 RT: 10.39-10.84 AV: 27 NL: 3.17E5<br/>T: + c ESI Q1MS [500.000-1200.000]</p> <p>688.40</p> <p>m/z</p> |

|         |     |                                                                                                                                                                                                                                                                                                                                                                                                                                                               |
|---------|-----|---------------------------------------------------------------------------------------------------------------------------------------------------------------------------------------------------------------------------------------------------------------------------------------------------------------------------------------------------------------------------------------------------------------------------------------------------------------|
| GLIAPFC | 684 | <p>F:\Other...data\XXIAPFC_11231111U 11/23/2011 2:32:55 PM</p> <p>Chromatogram peaks (min): 0.40, 0.95, 2.15, 3.66, 4.19, 5.12, 7.47, 8.14, 8.25, 8.83, 10.43, 11.18, 11.77, 12.51, 14.17, 15.13, 16.39, 18.29, 18.77</p> <p>Mass spectrum peaks (m/z): 508.19, 547.21, 557.97, 613.36, 664.58, 684.47, 690.63, 704.63, 716.60, 800.53, 868.72, 901.71, 922.09, 1016.82, 1093.09, 1126.24, 1170.28</p> <p>Metadata: NL: 2.36E6, m/z: 684.00, 685.00 MS, 2</p> |
| TQIAPFC | 743 | <p>F:\Other...data\XXIAPFC_11231111G 11/23/2011 3:53:58 PM</p> <p>Chromatogram peaks (min): 0.73, 0.68, 2.05, 3.89, 4.54, 6.10, 7.70, 8.01, 8.97, 9.28, 10.22, 10.45, 12.13, 13.79, 15.00, 16.01, 17.13, 18.62, 19.22</p> <p>Mass spectrum peaks (m/z): 513.46, 550.97, 558.16, 627.40, 690.63, 743.50, 781.56, 827.54, 852.75, 926.76, 976.89, 1025.94, 1100.96, 1187.17</p> <p>Metadata: NL: 6.44E5, m/z: 743.00, 744.00 MS, 35</p>                         |
| NVIAPFC | 727 | <p>F:\Other...data\XXIAPFC_11231111H 11/23/2011 4:20:59 PM</p> <p>Chromatogram peaks (min): 0.09, 1.07, 1.39, 3.61, 4.74, 6.08, 7.28, 7.95, 8.47, 8.88, 9.84, 10.05, 10.38, 11.68, 13.86, 14.24, 15.75, 18.07, 19.37</p> <p>Mass spectrum peaks (m/z): 563.04, 601.37, 627.42, 653.20, 727.48, 751.45, 807.65, 855.73, 887.74, 926.66, 990.77, 1026.94, 1125.01, 1189.25</p> <p>Metadata: NL: 5.98E5, m/z: 727.00, 728.00 MS, 24</p>                          |
| APIAPFC | 682 | <p>F:\Other...data\XXIAPFC_11231111A 11/23/2011 4:47:59 PM</p> <p>Chromatogram peaks (min): 0.62, 2.06, 3.61, 4.74, 6.65, 7.66, 7.58, 9.29, 10.05, 10.22, 10.48, 11.13, 12.39, 13.38, 14.62, 16.11, 16.95, 19.50, 19.79, 19.88</p> <p>Mass spectrum peaks (m/z): 629.44, 630.40, 639.43, 646.48, 651.39, 664.54, 671.50, 672.51, 673.55, 682.47, 690.64, 691.65, 704.68, 716.64, 724.67</p> <p>Metadata: NL: 5.67E5, m/z: 682.00, 683.00 MS, 2A</p>           |

|         |     |                                                                                                                                                                                                                                                                                                                                |
|---------|-----|--------------------------------------------------------------------------------------------------------------------------------------------------------------------------------------------------------------------------------------------------------------------------------------------------------------------------------|
| GAIAPFC | 642 | <p>F:\Other...data\XXIAPFC_112311\z0 11/23/2011 5:42:01 PM</p> 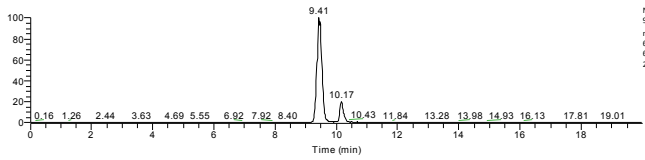 <p>Time (min)</p>  <p>m/z</p> <p>NL: 9.38 E<br/>m/z= 642.00-<br/>643.00 MS<br/>ZC</p>      |
| WSIAPFC | 787 | <p>F:\Other...data\XXIAPFC_112311\z0 11/23/2011 6:09:04 PM</p>  <p>Time (min)</p>  <p>m/z</p> <p>NL: 1476.6<br/>m/z= 787.00-<br/>788.00 MS<br/>ZC</p>      |
| HSIAPFC | 738 | <p>F:\Other...data\XXIAPFC_112311\z0 11/23/2011 7:03:06 PM</p>  <p>Time (min)</p>  <p>m/z</p> <p>NL: 1488.5<br/>m/z= 738.00-<br/>739.00 MS<br/>ZC</p>  |
| SVIAPFC | 700 | <p>F:\Other...data\XXIAPFC_112311\z0 11/23/2011 7:30:06 PM</p>  <p>Time (min)</p>  <p>m/z</p> <p>NL: 3.07 E5<br/>m/z= 700.00-<br/>701.00 MS<br/>ZC</p> |

|         |     |                                                                                                                                                                                                                                                                                                                                                                                                                                                                                                                                             |
|---------|-----|---------------------------------------------------------------------------------------------------------------------------------------------------------------------------------------------------------------------------------------------------------------------------------------------------------------------------------------------------------------------------------------------------------------------------------------------------------------------------------------------------------------------------------------------|
| WGIAPFC | 757 | <p>F:\Other...data\XXIAPFC_1123113C 11/23/2011 9:18:09 PM</p> <p>Chromatogram Peak: 10.98 min</p> <p>Mass Spectrum Base Peak: 757.50 m/z</p> <p>Other peaks (min): 0.35, 1.07, 2.17, 3.16, 3.76, 5.67, 6.49, 7.80, 8.59, 9.19, 9.96, 11.34, 12.97, 13.62, 15.58, 16.52, 17.78, 19.82</p> <p>Other peaks (m/z): 549.50, 627.42, 664.57, 690.60, 721.59, 784.68, 853.72, 889.66, 915.80, 981.89, 1020.00, 1115.09, 1175.26</p> <p>Metadata: NL: 3.98E 6, m/z: 757.00-758.00 MS, 3C</p>                                                        |
| GEIAPFC | 700 | <p>F:\Other...data\XXIAPFC_1123113E 11/23/2011 10:12:13 PM</p> <p>Chromatogram Peaks: 9.36, 9.90 min</p> <p>Mass Spectrum Base Peak: 700.43 m/z</p> <p>Other peaks (min): 0.40, 1.07, 2.08, 2.82, 4.43, 5.88, 7.49, 8.09, 8.85, 10.17, 11.70, 12.71, 13.69, 14.55, 16.06, 18.07, 19.60</p> <p>Other peaks (m/z): 550.89, 558.05, 617.37, 659.45, 718.46, 765.54, 838.45, 864.72, 926.74, 972.28, 1001.84, 1065.60, 1100.95, 1188.10</p> <p>Metadata: NL: 1.48E 6, m/z: 700.00-701.00 MS, 3E</p>                                             |
| EGIAPFC | 700 | <p>F:\Other...data\XXIAPFC_1123113F 11/23/2011 10:39:13 PM</p> <p>Chromatogram Peak: 9.36 min</p> <p>Mass Spectrum Base Peak: 557.94 m/z</p> <p>Other peaks (min): 0.81, 2.05, 2.24, 3.25, 4.93, 5.62, 6.96, 8.11, 9.12, 10.27, 11.82, 12.61, 13.91, 13.98, 15.96, 16.49, 19.17, 19.65</p> <p>Other peaks (m/z): 530.31, 540.41, 550.90, 553.28, 563.45, 576.36, 577.43, 578.53, 594.33, 609.43, 610.45, 632.59, 643.80, 654.46, 659.40, 668.41, 689.55, 690.58, 700.42, 704.64</p> <p>Metadata: NL: 3.34E 5, m/z: 700.00-701.00 MS, 3F</p> |
| GGIAPFC | 628 | <p>F:\Other...data\XXIAPFC_1123113B 11/24/2011 12:27:18 AM</p> <p>Chromatogram Peak: 9.26 min</p> <p>Mass Spectrum Base Peak: 628.34 m/z</p> <p>Other peaks (min): 0.81, 2.37, 2.91, 3.88, 4.93, 6.29, 6.67, 8.23, 8.45, 10.02, 10.93, 10.15, 11.46, 12.23, 13.71, 14.94, 16.54, 17.59, 18.36</p> <p>Other peaks (m/z): 508.40, 540.48, 557.95, 576.39, 684.49, 755.53, 805.59, 838.65, 852.67, 916.20, 965.84, 1008.87, 1065.72, 1114.96, 1180.44</p> <p>Metadata: NL: 1.80E 6, m/z: 628.00-629.00 MS, 4B</p>                              |

|         |     |                                                                                                                                                      |
|---------|-----|------------------------------------------------------------------------------------------------------------------------------------------------------|
| GYIAPFC | 734 | <p>F:\Other...data\XXIAPFC_11231114C 11/24/2011 12:54:18 AM</p> <p>Time (min)</p> <p>m/z</p> <p>NL: 5.92E5<br/>m/z: 734.00-<br/>735.00 MS<br/>4C</p> |
| LDIAPFC | 742 | <p>F:\Other...data\XXIAPFC_11231114D 11/24/2011 1:21:20 AM</p> <p>Time (min)</p> <p>m/z</p> <p>NL: 4.40E6<br/>m/z: 742.00-<br/>743.00 MS<br/>4D</p>  |
| SYIAPFC | 764 | <p>F:\Other...data\XXIAPFC_11231114H 11/24/2011 3:09:24 AM</p> <p>Time (min)</p> <p>m/z</p> <p>NL: 3.36E5<br/>m/z: 764.00-<br/>765.00 MS<br/>4H</p>  |
| LAIAPFC | 698 | <p>F:\Other...data\XXIAPFC_11231115B 11/28/2011 10:22:59 AM</p> <p>Time (min)</p> <p>m/z</p> <p>NL: 4.02E6<br/>m/z: 698.00-<br/>699.00 MS<br/>5B</p> |

|                                               |                                  |                                                                                                                                                                                                                                                                                                                                                                                                                                                                                                                                                                                                                                                                                                                                                                                                                   |
|-----------------------------------------------|----------------------------------|-------------------------------------------------------------------------------------------------------------------------------------------------------------------------------------------------------------------------------------------------------------------------------------------------------------------------------------------------------------------------------------------------------------------------------------------------------------------------------------------------------------------------------------------------------------------------------------------------------------------------------------------------------------------------------------------------------------------------------------------------------------------------------------------------------------------|
| <p>ISIAPFC</p>                                | <p>714</p>                       | <p>F:\Other...data\XXIAPFC_11231105C 11/28/2011 10:49:59 AM</p> 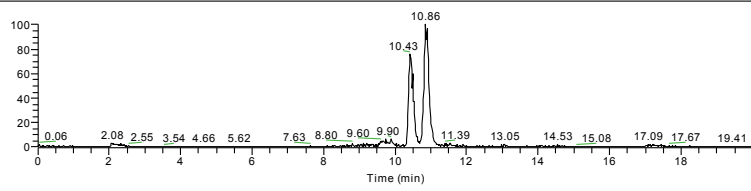 <p>Time (min)</p>  <p>m/z</p>                                                                                                                                                                                                                                                                                                                                                                                                                                                                                                                                                |
| <p>STIAPFC</p> <p>+prenyl</p> <p>+2prenyl</p> | <p>702</p> <p>770</p> <p>838</p> | <p>F:\Other...data\XXIAPFC_11231105F 11/28/2011 12:11:02 PM</p>  <p>Time (min)</p>  <p>m/z</p> <p>F:\Other...data\XXIAPFC_11231105F 11/28/2011 12:11:02 PM</p>  <p>Time (min)</p>  <p>m/z</p> <p>F:\Other...data\XXIAPFC_11231105F 11/28/2011 12:11:02 PM</p>  <p>Time (min)</p>  <p>m/z</p> |

|                |            |                                                                                                                                                                                                                                                                                                                                                                                                                                                                                                                                                                          |
|----------------|------------|--------------------------------------------------------------------------------------------------------------------------------------------------------------------------------------------------------------------------------------------------------------------------------------------------------------------------------------------------------------------------------------------------------------------------------------------------------------------------------------------------------------------------------------------------------------------------|
| <p>TNIAPFC</p> | <p>729</p> | <p>F:\Other...data\XXIAPFC_11231116A 11/28/2011 1:32:05 PM</p> 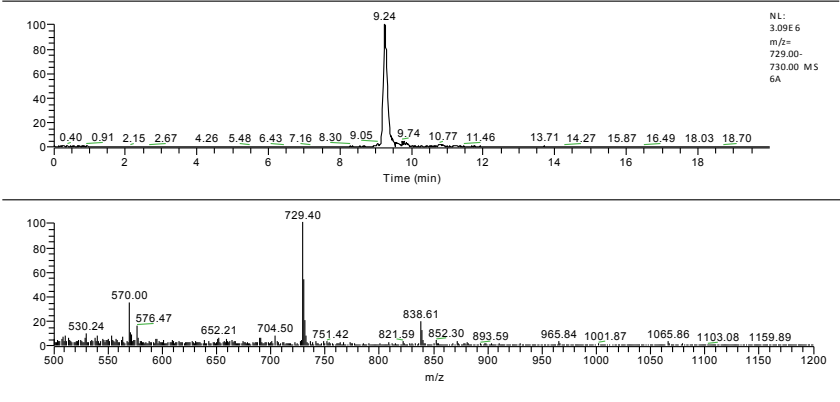 <p>Chromatogram (Time (min)) peaks: 0.40, 0.91, 2.15, 2.67, 4.26, 5.48, 6.43, 7.16, 8.30, 9.05, 9.24, 9.74, 10.77, 11.46, 13.71, 14.27, 15.87, 16.49, 18.03, 18.70</p> <p>Mass Spectrum (m/z) peaks: 530.24, 570.00, 576.47, 652.21, 704.50, 729.40, 751.42, 821.59, 838.61, 852.30, 893.59, 965.84, 1001.87, 1065.86, 1103.08, 1159.89</p> <p>Parameters: NL: 3.09E6, m/z: 729.00-730.00 MS 6A</p>                    |
| <p>FGIAPFC</p> | <p>718</p> | <p>F:\Other...data\XXIAPFC_11231116C 11/28/2011 2:26:06 PM</p>  <p>Chromatogram (Time (min)) peaks: 0.55, 2.05, 2.82, 3.83, 4.26, 5.58, 7.08, 7.87, 8.93, 9.65, 10.68, 11.08, 11.30, 12.01, 13.76, 14.26, 16.47, 17.42, 19.10</p> <p>Mass Spectrum (m/z) peaks: 557.95, 608.34, 647.31, 704.58, 718.45, 735.56, 763.21, 852.62, 889.80, 917.85, 963.07, 1015.79, 1043.44, 1115.93, 1184.15</p> <p>Parameters: NL: 1.18E7, m/z: 718.00-719.00 MS 6C</p>                                |
| <p>HDIAPFC</p> | <p>766</p> | <p>F:\Other...data\XXIAPFC_11231116E 11/28/2011 3:20:09 PM</p>  <p>Chromatogram (Time (min)) peaks: 1.02, 2.24, 2.46, 3.37, 5.65, 7.11, 7.96, 8.35, 9.04, 9.40, 10.65, 10.72, 10.99, 11.17, 11.85, 13.79, 14.14, 15.08, 16.51, 17.50, 19.82</p> <p>Mass Spectrum (m/z) peaks: 549.44, 552.32, 572.33, 580.32, 627.34, 671.47, 704.59, 735.59, 766.45, 807.49, 868.70, 889.69, 929.68, 1000.89, 1036.89, 1108.00, 1187.18</p> <p>Parameters: NL: 2.46E5, m/z: 766.00-767.00 MS 6E</p> |

|         |     |                                                                                                                                                                                                                                                                                                                                                                                                                                                                                                                                                                 |
|---------|-----|-----------------------------------------------------------------------------------------------------------------------------------------------------------------------------------------------------------------------------------------------------------------------------------------------------------------------------------------------------------------------------------------------------------------------------------------------------------------------------------------------------------------------------------------------------------------|
| VYIAPFC | 776 | <p>F:\Other...data\XXIAPFC_11231116G 11/28/2011 4:14:10 PM</p> 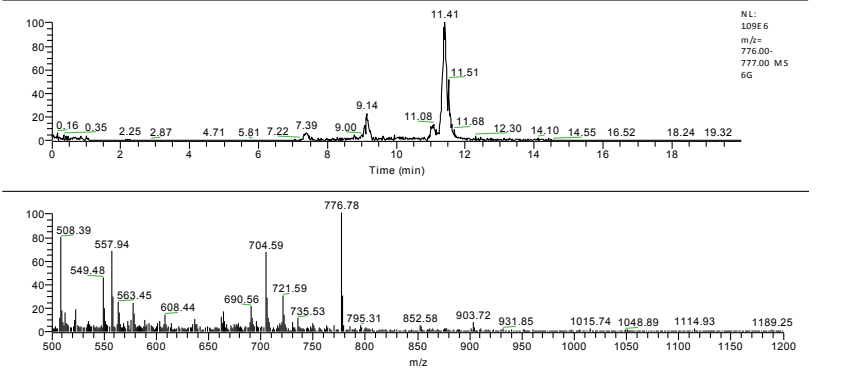 <p>Chromatogram peaks (min): 0.16, 0.35, 2.25, 2.87, 4.71, 5.81, 7.22, 7.39, 9.00, 9.14, 11.08, 11.41, 11.51, 11.68, 12.30, 14.10, 14.55, 16.52, 18.24, 19.32</p> <p>Mass spectrum peaks (m/z): 508.39, 549.48, 557.94, 563.45, 608.44, 690.56, 704.59, 721.59, 735.53, 776.78, 795.31, 852.58, 903.72, 931.85, 1015.74, 1048.89, 1114.93, 1189.25</p> <p>Metadata: NL: 109E6, m/z: 776.00, 777.00 MS, 6G</p> |
| GFIAPFC | 718 | <p>F:\Other...data\XXIAPFC_11231116H 11/28/2011 4:41:10 PM</p>  <p>Chromatogram peaks (min): 0.57, 0.83, 2.03, 2.48, 3.01, 4.67, 7.13, 7.51, 8.26, 9.52, 9.74, 10.67, 11.34, 11.47, 11.63, 11.94, 13.90, 14.14, 15.25, 16.54, 16.73, 19.70</p> <p>Mass spectrum peaks (m/z): 549.43, 552.36, 572.29, 627.54, 671.45, 718.48, 721.58, 770.67, 802.73, 868.70, 903.90, 954.95, 991.81, 1038.93, 1107.09, 1167.95</p> <p>Metadata: NL: 13E6, m/z: 718.00, 719.00 MS, 6H</p>     |
| SNIAPFC | 715 | <p>F:\Other...data\XXIAPFC_11231117A 11/28/2011 5:08:12 PM</p>  <p>Chromatogram peaks (min): 0.69, 2.31, 2.49, 3.89, 4.81, 6.05, 7.49, 7.82, 8.73, 9.16, 9.36, 10.63, 11.79, 13.88, 14.64, 17.09, 17.56, 17.85</p> <p>Mass spectrum peaks (m/z): 513.37, 550.83, 576.38, 617.33, 659.27, 715.40, 765.62, 814.41, 852.30, 926.70, 965.99, 1001.75, 1065.69, 1101.01, 1136.93, 1174.06</p> <p>Metadata: NL: 11E6, m/z: 715.00, 716.00 MS, 7A</p>                              |



|                           |                                                                         |                                                                                                                                                                                                                                                                                                                                                                                                                            |
|---------------------------|-------------------------------------------------------------------------|----------------------------------------------------------------------------------------------------------------------------------------------------------------------------------------------------------------------------------------------------------------------------------------------------------------------------------------------------------------------------------------------------------------------------|
| <p>EFIAPFC</p> <p>790</p> | <p>F:\Other...data\XXIAPFC_11231111\B</p> <p>11/28/2011 5:35:10 PM</p>  | <p>Chromatogram peaks (min): 0.69, 1.00, 2.36, 3.44, 4.66, 5.34, 7.58, 8.33, 9.23, 9.62, 9.96, 10.05, 10.12, 10.58, 11.84, 13.72, 13.86, 15.03, 16.95, 17.62, 19.12</p> <p>Mass spectrum peaks (m/z): 530.28, 563.49, 627.35, 704.67, 735.42, 790.57, 868.81, 889.75, 932.69, 986.81, 1049.24, 1108.26, 1138.70</p> <p>Parameters: NL: 1.0E6, m/z: 790.00, 79100 MS, 7B</p>                                                |
| <p>NYIAPFC</p> <p>791</p> | <p>F:\Other...data\XXIAPFC_11231111\C</p> <p>11/28/2011 9:38:54 PM</p>  | <p>Chromatogram peaks (min): 0.95, 1.07, 2.22, 2.49, 3.76, 4.67, 6.67, 7.87, 8.85, 9.00, 9.69, 10.08, 10.15, 10.74, 11.65, 12.52, 13.74, 13.83, 14.00, 15.51, 17.86, 18.50, 19.24</p> <p>Mass spectrum peaks (m/z): 513.35, 550.83, 563.51, 632.45, 690.53, 704.59, 721.56, 791.49, 827.56, 866.64, 926.78, 976.55, 1025.90, 1093.74, 1100.95, 1143.01, 1189.16</p> <p>Parameters: NL: 2.3E5, m/z: 79100, 79200 MS, 8C</p> |
| <p>GIIAPFC</p> <p>684</p> | <p>F:\Other...data\XXIAPFC_11231111\E</p> <p>11/28/2011 10:32:56 PM</p> | <p>Chromatogram peaks (min): 0.95, 2.12, 2.92, 3.68, 5.33, 6.07, 7.37, 8.28, 8.57, 8.49, 10.53, 11.27, 11.53, 12.35, 14.19, 14.34, 17.23, 18.64, 18.74</p> <p>Mass spectrum peaks (m/z): 547.18, 552.32, 572.33, 580.29, 609.35, 643.36, 671.47, 684.39, 704.65, 770.67, 807.53, 868.72, 903.75, 935.46, 993.70, 1059.47, 1086.84, 1129.93, 1175.22</p> <p>Parameters: NL: 1.1E6, m/z: 684.00, 685.00 MS, 8E</p>           |

|         |     |                                                                 |
|---------|-----|-----------------------------------------------------------------|
| QLIAPFC | 755 | <p>F:\Other...data\XXIAPFC_112311198 11/29/2011 12:47:59 AM</p> |
| NLIAPFC | 741 | <p>F:\Other...data\XXIAPFC_112311198 11/29/2011 2:09:00 AM</p>  |
| YAIAPFC | 748 | <p>F:\Other...data\XXIAPFC_112311198 11/29/2011 3:30:00 AM</p>  |

|         |     |                                                                                                                                                                                                                                                                                                                                                                                                                                                                                 |
|---------|-----|---------------------------------------------------------------------------------------------------------------------------------------------------------------------------------------------------------------------------------------------------------------------------------------------------------------------------------------------------------------------------------------------------------------------------------------------------------------------------------|
| GVIAPFC | 670 | <p>F:\Other...data\XXIAPFC_11231110B 11/29/2011 9:51:31 AM</p> <p>Chromatogram peaks (min): 0.74, 0.93, 2.17, 3.08, 4.80, 6.34, 7.30, 8.23, 8.52, 9.90, 10.20, 10.26, 10.96, 11.06, 12.42, 13.45, 13.95, 15.68, 17.42, 17.81, 17.90</p> <p>Mass spectrum peaks (m/z): 508.30, 557.88, 563.51, 577.86, 608.31, 670.33, 704.53, 718.58, 749.73, 790.35, 852.56, 882.41, 919.88, 1015.77, 1081.00, 1114.77, 1173.12</p> <p>Parameters: NL: 4.36E5, m/z: 670.00, 671.00 MS, 308</p> |
| SNIAPFC | 715 | <p>F:\Other...data\XXIAPFC_11231110C 11/29/2011 10:18:31 AM</p> <p>Chromatogram peaks (min): 0.18, 1.00, 2.30, 3.71, 4.69, 6.08, 7.13, 8.08, 8.95, 9.16, 9.47, 10.36, 11.58, 13.23, 15.24, 16.87, 17.61, 19.82</p> <p>Mass spectrum peaks (m/z): 540.66, 563.31, 617.58, 689.43, 715.32, 730.41, 799.53, 838.52, 885.74, 931.58, 965.80, 989.41, 1079.90, 1139.80, 1186.69</p> <p>Parameters: NL: 2.42E6, m/z: 715.00-716.00, MS, 308</p>                                       |
| HSIAPFC | 738 | <p>F:\Other...data\XXIAPFC_11231110E 11/29/2011 11:12:32 AM</p> <p>Chromatogram peaks (min): 0.43, 0.72, 2.10, 2.87, 3.99, 5.00, 6.74, 7.78, 8.52, 9.45, 9.55, 10.51, 10.72, 11.08, 11.97, 12.76, 14.75, 15.41, 17.66, 18.62</p> <p>Mass spectrum peaks (m/z): 508.04, 547.11, 563.41, 571.84, 628.37, 671.46, 704.57, 738.44, 749.59, 807.55, 852.71, 915.37, 952.17, 988.89, 1037.96, 1115.63, 1174.94</p> <p>Parameters: NL: 3.84E5, m/z: 738.00-739.00 MS, 308</p>          |

|         |     |                                                                                                                                                                                                                                                                                                                                                                                                                                                                                                                  |
|---------|-----|------------------------------------------------------------------------------------------------------------------------------------------------------------------------------------------------------------------------------------------------------------------------------------------------------------------------------------------------------------------------------------------------------------------------------------------------------------------------------------------------------------------|
| SDIAPFC | 716 | <p>F:\Other...data\XXIAPFC_112311111C 11/29/2011 1:54:35 PM</p> <p>Chromatogram peaks (min): 0.67, 0.72, 2.12, 2.24, 3.56, 4.74, 7.15, 7.92, 8.42, 9.14, 9.47, 11.17, 12.66, 13.76, 13.96, 14.27, 15.22, 16.15, 18.55</p> <p>Mass spectrum peaks (m/z): 511.19, 550.76, 563.39, 576.46, 627.34, 650.33, 704.61, 733.60, 764.73, 852.90, 926.91, 1001.83, 1042.75, 1100.86, 1137.05, 1172.02</p> <p>Parameters: NL: 4.26E5, m/z: 78.00-717.00, MS 1C</p>                                                          |
| PLIAPFC | 724 | <p>F:\Other...data\XXIAPFC_112311111F 11/29/2011 3:15:38 PM</p> <p>Chromatogram peaks (min): 0.98, 1.07, 2.01, 4.26, 5.83, 7.06, 7.53, 7.71, 8.99, 9.19, 9.33, 9.28, 9.45, 9.62, 9.96, 11.53, 12.71, 14.48, 14.74, 17.14, 18.83</p> <p>Mass spectrum peaks (m/z): 513.37, 530.25, 553.28, 627.37, 659.38, 724.47, 751.46, 758.51, 765.58, 827.60, 877.61, 926.73, 976.70, 1025.89, 1100.96, 1187.19</p> <p>Parameters: NL: 3.08E5, m/z: 724.00-725.00, MS 1F</p>                                                 |
| VLIAPFC | 726 | <p>F:\Other...data\XXIAPFC_112311111H 11/29/2011 4:09:38 PM</p> <p>Chromatogram peaks (min): 0.18, 0.86, 2.25, 3.39, 3.94, 5.31, 6.60, 7.97, 8.52, 9.09, 9.62, 10.12, 11.92, 12.42, 12.75, 13.98, 14.98, 16.99, 18.38, 19.24</p> <p>Mass spectrum peaks (m/z): 541.01, 563.46, 577.45, 636.18, 690.46, 704.69, 726.53, 735.49, 773.54, 834.90, 903.90, 937.50, 999.45, 1075.12, 1121.74, 1191.30</p> <p>Parameters: NL: 8.29E5, m/z: 726.00-727.00, MS 1H</p>                                                    |
| HLIAPFC | 764 | <p>F:\Other...data\XXIAPFC_112311112A 11/29/2011 4:36:36 PM</p> <p>Chromatogram peaks (min): 0.74, 0.88, 1.07, 2.19, 2.36, 4.54, 5.00, 5.91, 7.29, 8.13, 8.95, 9.71, 10.31, 11.94, 12.06, 12.23, 12.33, 12.47, 12.73, 13.71, 14.70, 16.49, 17.49, 18.50, 19.51</p> <p>Mass spectrum peaks (m/z): 511.26, 549.44, 563.48, 577.24, 636.60, 690.60, 704.61, 718.68, 764.55, 807.59, 875.75, 853.91, 937.27, 976.92, 1023.74, 1107.04, 1148.16, 1185.09</p> <p>Parameters: NL: 3.38E5, m/z: 764.00-765.00, MS 1A</p> |

|                |            |                                                                                                                                                                                                                                                                                                                                                                                                                                                                                                                                              |
|----------------|------------|----------------------------------------------------------------------------------------------------------------------------------------------------------------------------------------------------------------------------------------------------------------------------------------------------------------------------------------------------------------------------------------------------------------------------------------------------------------------------------------------------------------------------------------------|
| <p>TQIAPFC</p> | <p>743</p> | <p>F:\Other...data\XXIAPFC_112311112C 11/29/2011 5:30:38 PM</p> 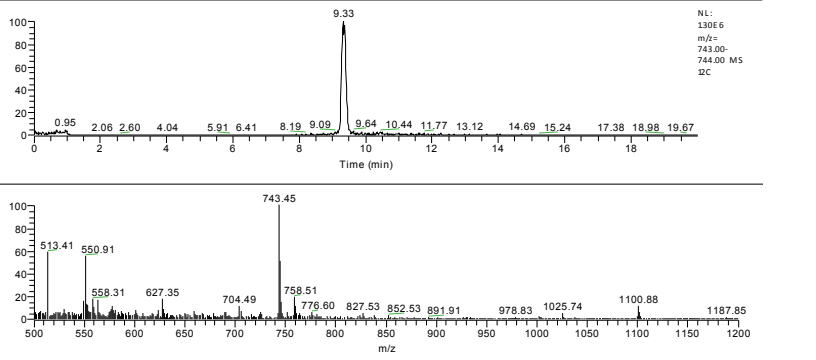 <p>Chromatogram (Time in min): 0.95, 2.06, 2.60, 4.04, 5.91, 6.41, 8.19, 9.09, 9.33, 9.64, 10.44, 11.77, 13.12, 14.69, 15.24, 17.38, 18.98, 19.67</p> <p>Mass Spectrum (m/z): 513.41, 550.91, 558.31, 627.35, 704.49, 743.45, 759.51, 776.60, 827.53, 852.53, 891.91, 978.83, 1025.74, 1100.88, 1187.85</p> <p>Parameters: NL: 130E6, m/z: 743.00, 744.00 MS, I2C</p>                     |
| <p>YQIAPFC</p> | <p>805</p> | <p>F:\Other...data\XXIAPFC_112311112E 11/29/2011 6:24:39 PM</p>  <p>Chromatogram (Time in min): 0.12, 0.95, 2.75, 3.89, 5.31, 7.34, 7.59, 9.26, 9.40, 10.00, 10.17, 11.72, 12.08, 13.74, 14.03, 15.15, 17.62, 19.96</p> <p>Mass Spectrum (m/z): 540.41, 570.15, 576.24, 628.12, 659.43, 704.65, 730.48, 763.23, 805.47, 838.59, 852.50, 898.07, 965.89, 1001.91, 1066.03, 1127.06, 1156.95</p> <p>Parameters: NL: 4.55E5, m/z: 805.00, 806.00 MS, I2E</p> |

## S4B. TSIXPXC

Note: An additional complication with this series is that if X is Ser or Thr in position 2 (adjacent to thiazoline), it is readily dehydrated. This dehydration, rather than heterocyclization, was confirmed by MS/MS in previous studies.

| Sequence   | m/z | Extracted ion chromatogram and mass spectrum at time point                                                                                                                                                                                                                                                                                                                                                                                                                                                              |
|------------|-----|-------------------------------------------------------------------------------------------------------------------------------------------------------------------------------------------------------------------------------------------------------------------------------------------------------------------------------------------------------------------------------------------------------------------------------------------------------------------------------------------------------------------------|
| TSIAPNC    | 669 | <p>F:\Other_data\TSIXPXC_1d_9611b 9/19/2011 11:18:41 AM</p> <p>NL: 9.00E6<br/>m/z: 669.00<br/>700.00 MS</p> <p>F:\Other_data\TSIXPXC_1d_9611b 9/19/2011 11:18:41 AM</p> <p>F:\Other_data\TSIXPXC_1d_9611b 9/19/2011 11:18:41 AM</p> <p>NL: 5.53E5<br/>m/z: 737.00<br/>738.00 MS</p> <p>F:\Other_data\TSIXPXC_1d_9611b 9/19/2011 11:18:41 AM</p> <p>F:\Other_data\TSIXPXC_1d_9611b 9/19/2011 11:18:41 AM</p> <p>NL: 1.95E5<br/>m/z: 805.00<br/>806.00 MS</p> <p>F:\Other_data\TSIXPXC_1d_9611b 9/19/2011 11:18:41 AM</p> |
| +isoprene  | 737 |                                                                                                                                                                                                                                                                                                                                                                                                                                                                                                                         |
| +2isoprene | 805 |                                                                                                                                                                                                                                                                                                                                                                                                                                                                                                                         |

|            |     |                                                         |
|------------|-----|---------------------------------------------------------|
| TSIVPHC    | 720 | F:\Other...data\TSIXPXC_1st_9b11C 9/19/2011 11:45:45 AM |
| +isoprene  | 788 |                                                         |
| +2isoprene | 856 |                                                         |
| TSIVPHC    | 769 | F:\Other...data\TSIXPXC_1st_9b11C 9/19/2011 11:45:45 AM |
| +isoprene  | 837 |                                                         |
|            |     |                                                         |
| TSIVPHC    | 769 | F:\Other...data\TSIXPXC_1st_9b11D 9/19/2011 12:12:45 PM |
| +isoprene  | 837 |                                                         |
|            |     |                                                         |
|            |     |                                                         |
|            |     |                                                         |

|                                                   |                                  |                                                                                                                                                                                                                                                                                                                                                                                                                                                                                                                                                                                                                                                                                                          |
|---------------------------------------------------|----------------------------------|----------------------------------------------------------------------------------------------------------------------------------------------------------------------------------------------------------------------------------------------------------------------------------------------------------------------------------------------------------------------------------------------------------------------------------------------------------------------------------------------------------------------------------------------------------------------------------------------------------------------------------------------------------------------------------------------------------|
| <p>TSILPLC</p> <p>+isoprene</p> <p>+2isoprene</p> | <p>710</p> <p>778</p> <p>846</p> | <p>F:\Other_data\TSIXPXC_18_9611E 9/19/2011 12:39:51 PM</p> 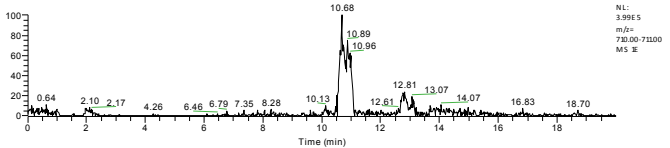  <p>F:\Other_data\TSIXPXC_18_9611E 9/19/2011 12:39:51 PM</p>   <p>F:\Other_data\TSIXPXC_18_9611E 9/19/2011 12:39:51 PM</p>   |
| <p>TSIHPLC</p> <p>+isoprene</p>                   | <p>734</p> <p>802</p>            | <p>F:\Other_data\TSIXPXC_18_9611E 9/19/2011 1:06:53 PM</p> <p>RT: 0.00 - 19.99</p>                                                                                                                                                                                                                                                                                                                                                                                                                                               |



|                                                   |                                  |                                                                                                                                                                                                                                                                                                                                                                                                                                                                                      |
|---------------------------------------------------|----------------------------------|--------------------------------------------------------------------------------------------------------------------------------------------------------------------------------------------------------------------------------------------------------------------------------------------------------------------------------------------------------------------------------------------------------------------------------------------------------------------------------------|
|                                                   |                                  | <p>F:\Other...data\TSIXPXC_1st_9e\117 9/19/2011 1:06:53 PM</p> <p>RT: 0.00 - 19.99</p> <p>11.23<br/>11.29</p> <p>NL: 2.26E5<br/>m/z: 802.00<br/>803.00 MS<br/>F</p>                                                                                                                                                                                                                                                                                                                  |
| <p>TSISPQC</p> <p>+isoprene</p> <p>+2isoprene</p> | <p>699</p> <p>767</p> <p>835</p> | <p>F:\Other...data\TSIXPXC_1st_9e\12 9/19/2011 4:16:13 PM</p> <p>RT: 0.00 - 19.99</p> <p>9.24</p> <p>NL: 3.33E5<br/>m/z: 699.00<br/>700.00 MS<br/>2E</p> <p>F:\Other...data\TSIXPXC_1st_9e\12 9/19/2011 4:16:13 PM</p> <p>RT: 0.00 - 19.99</p> <p>9.23<br/>9.26</p> <p>NL: 5.95E5<br/>m/z: 767.00<br/>768.00 MS<br/>2E</p> <p>F:\Other...data\TSIXPXC_1st_9e\12 9/19/2011 4:16:13 PM</p> <p>RT: 0.00 - 19.99</p> <p>11.06</p> <p>NL: 5.08E4<br/>m/z: 835.00<br/>836.00 MS<br/>2E</p> |

|                                                   |                                  |                                                                                                                                                                                                                                                                                                                                                                                                                                                                                                                                                                                                                                                                                                                                                                                                                                                                                                           |
|---------------------------------------------------|----------------------------------|-----------------------------------------------------------------------------------------------------------------------------------------------------------------------------------------------------------------------------------------------------------------------------------------------------------------------------------------------------------------------------------------------------------------------------------------------------------------------------------------------------------------------------------------------------------------------------------------------------------------------------------------------------------------------------------------------------------------------------------------------------------------------------------------------------------------------------------------------------------------------------------------------------------|
| <p>TSIVPLC</p> <p>+isoprene</p> <p>+2isoprene</p> | <p>696</p> <p>764</p> <p>832</p> | <p>F:\Other...data\TSIXPXC_1st_9e1us 9/19/2011 6:31:26 PM</p> <p>RT: 0.00 - 19.99</p> <p>10.41, 10.53, 12.68</p> <p>696.39</p> <p>549.35, 597.20, 668.33, 718.55, 749.41, 808.79, 852.46, 889.67, 957.31, 1024.30, 1115.22, 1180.27</p> <p>F:\Other...data\TSIXPXC_1st_9e1us 9/19/2011 6:31:26 PM</p> <p>RT: 0.00 - 19.99</p> <p>12.64, 12.73</p> <p>696.39, 764.55</p> <p>549.42, 597.21, 668.42, 698.53, 704.43, 786.50, 808.72, 876.39, 903.41, 952.62, 1021.64, 1102.14, 1142.32, 1170.25</p> <p>F:\Other...data\TSIXPXC_1st_9e1us 9/19/2011 6:31:26 PM</p> <p>RT: 0.00 - 19.99</p> <p>8.64, 16.81, 16.95</p> <p>663.42</p> <p>1.07, 2.27, 2.20, 3.59, 6.10, 6.51, 7.83, 8.43, 8.49, 8.93, 9.73, 10.62, 11.65, 12.76, 13.02, 14.94, 16.81, 18.89, 18.98</p> <p>663.42, 615.33, 577.43, 636.39, 676.65, 704.42, 743.72, 771.00, 832.78, 854.68, 871.45, 943.95, 1007.29, 1039.92, 1123.42, 1163.32</p> |
| <p>TSIGPVC</p> <p>+isoprene</p>                   | <p>640</p> <p>708</p>            | <p>F:\Other...data\TSIXPXC_1st_9e1us 9/19/2011 6:58:30 PM</p> <p>RT: 0.00 - 19.99</p> <p>10.26, 10.68, 13.50</p> <p>640.29, 730.43</p> <p>0.40, 2.13, 2.55, 4.69, 5.36, 6.08, 7.02, 8.19, 8.56, 8.88, 9.07, 11.42, 13.33, 13.62, 14.81, 17.37, 18.07, 19.41</p> <p>640.29, 553.28, 562.21, 549.25, 578.39, 662.39, 716.35, 780.98, 838.69, 880.59, 939.04, 965.83, 1019.76, 1076.60, 1121.66, 1176.83</p>                                                                                                                                                                                                                                                                                                                                                                                                                                                                                                 |

|            |     |                                                                                                                            |
|------------|-----|----------------------------------------------------------------------------------------------------------------------------|
|            |     | <p>F:\Other...data\TSIXPXC_1st_8e1a.d</p> <p>9/19/2011 6:58:30 PM</p> <p>RT: 0.00 - 19.99</p> <p>Time (min)</p> <p>m/z</p> |
| TSIWPLC    | 783 | <p>F:\Other...data\TSIXPXC_1st_8e1a.d</p> <p>9/19/2011 7:25:32 PM</p> <p>RT: 0.00 - 19.99</p> <p>Time (min)</p> <p>m/z</p> |
| +isoprene  | 851 | <p>F:\Other...data\TSIXPXC_1st_8e1a.d</p> <p>9/19/2011 7:25:32 PM</p> <p>RT: 0.00 - 19.99</p> <p>Time (min)</p> <p>m/z</p> |
| TSIGPVC    | 640 | <p>F:\Other...data\TSIXPXC_1st_8e1a.d</p> <p>9/19/2011 7:52:35 PM</p> <p>RT: 0.00 - 19.99</p> <p>Time (min)</p> <p>m/z</p> |
| +isoprene  | 708 |                                                                                                                            |
| +2isoprene | 776 |                                                                                                                            |

|                                             |                            |                                                                                                                                                                                                                                                                                                                                                                                                                                                                              |
|---------------------------------------------|----------------------------|------------------------------------------------------------------------------------------------------------------------------------------------------------------------------------------------------------------------------------------------------------------------------------------------------------------------------------------------------------------------------------------------------------------------------------------------------------------------------|
|                                             |                            | <p>F:\Other...data\TSIXPXC_1d_9e\4c 9/19/2011 7:52:35 PM</p> 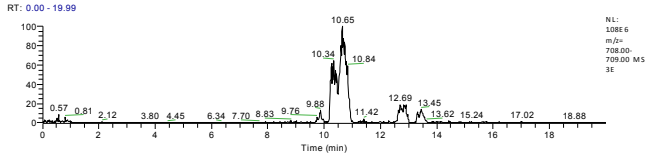  <p>F:\Other...data\TSIXPXC_1d_9e\4c 9/19/2011 7:52:35 PM</p>          |
| <p>TSIPPVC<br/>+isoprene<br/>+2isoprene</p> | <p>680<br/>748<br/>816</p> | <p>F:\Other...data\TSIXPXC_1d_9e\4d 9/19/2011 8:19:39 PM</p>   <p>F:\Other...data\TSIXPXC_1d_9e\4d 9/19/2011 8:19:39 PM</p>   |

|                              |                    |                                                                                                                                                                                                                                                                                                                                                                                                                                                                                                                                                                                                                                                                                                                                                                                                                                                                                                                                                                                                                                                                                                                     |
|------------------------------|--------------------|---------------------------------------------------------------------------------------------------------------------------------------------------------------------------------------------------------------------------------------------------------------------------------------------------------------------------------------------------------------------------------------------------------------------------------------------------------------------------------------------------------------------------------------------------------------------------------------------------------------------------------------------------------------------------------------------------------------------------------------------------------------------------------------------------------------------------------------------------------------------------------------------------------------------------------------------------------------------------------------------------------------------------------------------------------------------------------------------------------------------|
|                              |                    | <p>F:\Other...data\TSIXPXC_1st_90v3r 9/19/2011 8:19:39 PM</p> 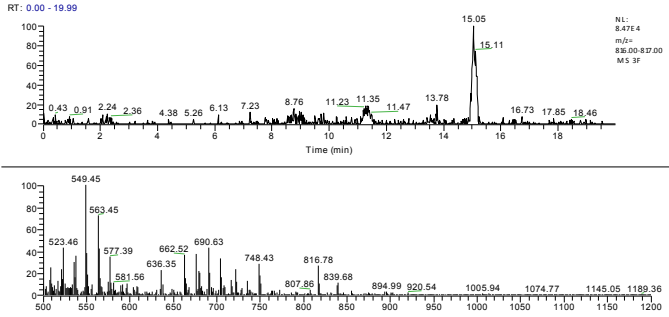 <p>RT: 0.00 - 19.99</p> <p>15.05</p> <p>NL: 8.47E4<br/>m/z= 836.00 837.00<br/>MS 3F</p> <p>Time (min)</p> <p>549.45</p> <p>563.45</p> <p>523.46</p> <p>577.39</p> <p>581.56</p> <p>636.35</p> <p>662.52</p> <p>690.63</p> <p>748.43</p> <p>816.78</p> <p>807.86</p> <p>839.68</p> <p>894.99</p> <p>920.54</p> <p>1005.94</p> <p>1074.77</p> <p>1145.05</p> <p>1189.36</p> <p>m/z</p>                                                                                                                                                                                                                                                                                                                                                                                                                                                                                                                                                                               |
| <p>TSIYPFC<br/>+isoprene</p> | <p>794<br/>862</p> | <p>F:\Other...data\TSIXPXC_1st_90v3r 9/19/2011 8:46:39 PM</p>  <p>RT: 0.00 - 19.99</p> <p>9.43</p> <p>9.64</p> <p>9.74</p> <p>11.11</p> <p>11.30</p> <p>NL: 6.06E5<br/>m/z= 794.00<br/>795.00 MS<br/>3G</p> <p>Time (min)</p> <p>794.51</p> <p>513.33</p> <p>563.45</p> <p>577.44</p> <p>636.55</p> <p>704.49</p> <p>758.51</p> <p>827.43</p> <p>863.69</p> <p>911.46</p> <p>941.84</p> <p>1025.85</p> <p>1101.06</p> <p>1167.03</p> <p>m/z</p> <p>F:\Other...data\TSIXPXC_1st_90v3r 9/19/2011 8:46:39 PM</p>  <p>RT: 0.00 - 19.99</p> <p>11.10</p> <p>11.18</p> <p>11.03</p> <p>10.91</p> <p>11.32</p> <p>NL: 4.59E5<br/>m/z= 862.00<br/>863.00 MS<br/>3G</p> <p>Time (min)</p> <p>862.56</p> <p>549.43</p> <p>563.38</p> <p>535.45</p> <p>577.47</p> <p>636.55</p> <p>704.46</p> <p>735.55</p> <p>794.55</p> <p>812.43</p> <p>884.54</p> <p>920.26</p> <p>967.85</p> <p>1030.95</p> <p>1077.78</p> <p>1120.41</p> <p>1162.82</p> <p>m/z</p> |
| <p>TSINPWC<br/>+isoprene</p> | <p>784<br/>852</p> | <p>F:\Other...data\TSIXPXC_1st_90v3r 9/20/2011 12:20:29 PM</p>  <p>RT: 0.00 - 19.99</p> <p>8.71</p> <p>8.88</p> <p>9.69</p> <p>10.87</p> <p>12.26</p> <p>13.38</p> <p>14.50</p> <p>15.30</p> <p>16.15</p> <p>17.93</p> <p>19.68</p> <p>NL: 1.02E6<br/>m/z= 784.00<br/>785.00 MS<br/>4C</p> <p>Time (min)</p> <p>730.36</p> <p>784.41</p> <p>553.22</p> <p>562.21</p> <p>549.42</p> <p>576.21</p> <p>646.37</p> <p>674.32</p> <p>735.77</p> <p>814.59</p> <p>838.54</p> <p>842.54</p> <p>906.84</p> <p>945.48</p> <p>972.32</p> <p>1009.16</p> <p>1076.86</p> <p>1168.43</p> <p>m/z</p>                                                                                                                                                                                                                                                                                                                                                                                                                                          |

|            |     |                                                                                                                                                                         |
|------------|-----|-------------------------------------------------------------------------------------------------------------------------------------------------------------------------|
|            |     | <p>F:\Other...data\TSIXPXC_1d_9e4u 9/20/2011 12:20:29 PM</p> <p>RT: 0.00 - 19.99</p> <p>Time (min)</p> <p>m/z</p> <p>NL: 2485<br/>m/z: 832.00<br/>833.00 MS<br/>4C</p>  |
| TSISPLC    | 649 | <p>F:\Other...data\TSIXPXC_1d_9e4u 9/20/2011 12:47:31 PM</p> <p>RT: 0.00 - 19.99</p> <p>Time (min)</p> <p>m/z</p> <p>NL: 2986<br/>m/z: 684.00<br/>685.00 MS<br/>4D</p>  |
| +isoprene  | 752 | <p>F:\Other...data\TSIXPXC_1d_9e4u 9/20/2011 12:47:31 PM</p> <p>RT: 0.00 - 19.99</p> <p>Time (min)</p> <p>m/z</p> <p>NL: 5336<br/>m/z: 752.00<br/>753.00 MS<br/>4D</p>  |
| TSILPTC    | 698 | <p>F:\Other...data\TSIXPXC_1d_9e4u 9/20/2011 11:14:34 PM</p> <p>RT: 0.00 - 19.99</p> <p>Time (min)</p> <p>m/z</p> <p>NL: 457E5<br/>m/z: 698.00<br/>699.00 MS<br/>4E</p> |
| (dehydroT) | 680 |                                                                                                                                                                         |
| +isoprene  | 766 |                                                                                                                                                                         |
| +2isoprene | 834 |                                                                                                                                                                         |
| dht+ipr    | 748 |                                                                                                                                                                         |
| dht+2ipr   | 816 |                                                                                                                                                                         |

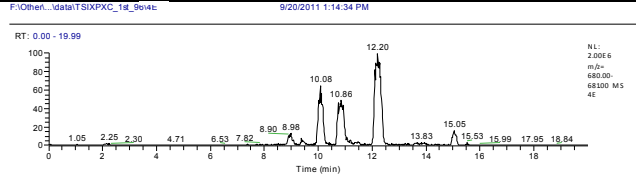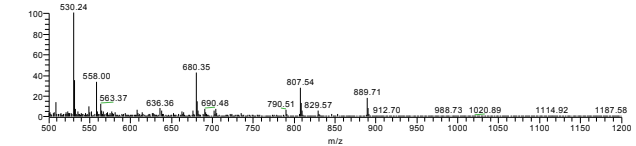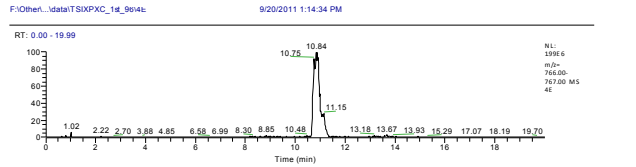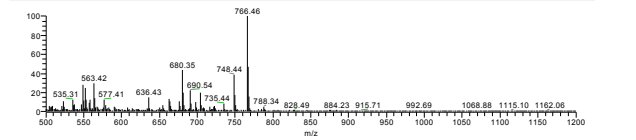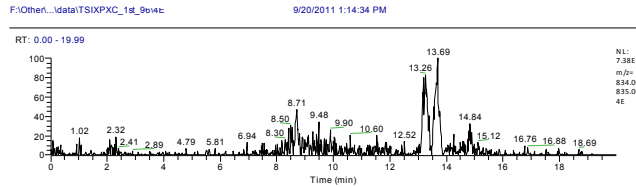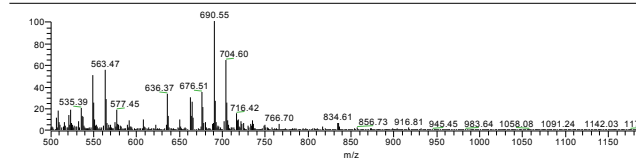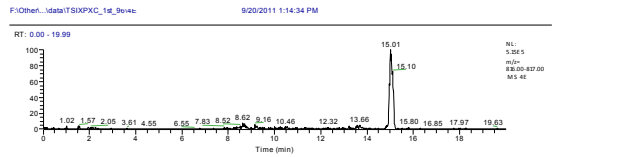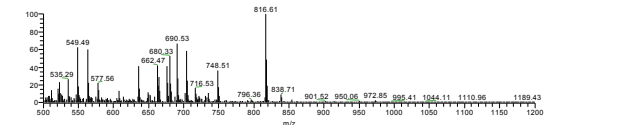

|                                                   |                                  |                                                                                                                                                                                                                                                                                                                                                                                                                                                                                                                                                                                                                                                                                                                                                                                                                                                                                                                                                                                                                                                                                                                                                                                                                                                                                                                                                                        |
|---------------------------------------------------|----------------------------------|------------------------------------------------------------------------------------------------------------------------------------------------------------------------------------------------------------------------------------------------------------------------------------------------------------------------------------------------------------------------------------------------------------------------------------------------------------------------------------------------------------------------------------------------------------------------------------------------------------------------------------------------------------------------------------------------------------------------------------------------------------------------------------------------------------------------------------------------------------------------------------------------------------------------------------------------------------------------------------------------------------------------------------------------------------------------------------------------------------------------------------------------------------------------------------------------------------------------------------------------------------------------------------------------------------------------------------------------------------------------|
|                                                   |                                  | <p>F:\Other...data\TSIXPXC_1st_9e14E 9/20/2011 1:14:34 PM</p> <p>RT: 0.00 - 19.99</p> <p>12.11 12.32</p> <p>10.84 12.56 15.05 15.29 17.76 18.34 19.80</p> <p>Time (min)</p> <p>748.49</p> <p>680.35</p> <p>523.24 563.49 614.36 662.39 690.52 770.44 807.59 875.63 897.57 972.78 999.73 1090.32 1135.81 1188.65</p> <p>m/z</p> <p>NL: 5336.6<br/>m/z: 748.00<br/>749.00 MS<br/>4E</p>                                                                                                                                                                                                                                                                                                                                                                                                                                                                                                                                                                                                                                                                                                                                                                                                                                                                                                                                                                                  |
| <p>TSIGPLC</p> <p>+isoprene</p> <p>+2isoprene</p> | <p>654</p> <p>722</p> <p>790</p> | <p>F:\Other...data\TSIXPXC_1st_9e14G 9/20/2011 2:08:40 PM</p> <p>RT: 0.00 - 19.99</p> <p>8.97 9.31 10.89 11.20</p> <p>0.86 1.53 2.32 3.32 4.16 5.21 7.03 7.78 7.90 9.65 13.21 13.42 13.59 14.60 16.54 17.88 18.89</p> <p>Time (min)</p> <p>654.33</p> <p>676.22</p> <p>550.84 589.35 631.43 694.25 758.49 800.47 852.67 877.36 942.76 1003.66 1059.31 1100.91 1153.94</p> <p>m/z</p> <p>NL: 244E.6<br/>m/z: 654.00<br/>655.00 MS<br/>4G</p> <p>F:\Other...data\TSIXPXC_1st_9e14G 9/20/2011 2:08:40 PM</p> <p>RT: 0.00 - 19.99</p> <p>10.75 10.87 11.18 11.25</p> <p>1.05 2.12 2.55 3.94 5.79 6.72 7.46 8.06 8.56 10.55 13.21 13.36 13.59 14.62 16.92 18.26 18.82</p> <p>Time (min)</p> <p>722.41</p> <p>654.32</p> <p>549.42 535.40 577.49 636.36 672.35 740.50 744.39 785.28 882.74 958.36 1009.66 1079.11 1116.75 1153.02</p> <p>m/z</p> <p>NL: 287E.6<br/>m/z: 722.00<br/>723.00 MS<br/>4G</p> <p>F:\Other...data\TSIXPXC_1st_9e14G 9/20/2011 2:08:40 PM</p> <p>RT: 0.00 - 19.99</p> <p>9.72 9.88 13.24 13.42 13.62 13.77</p> <p>0.26 1.55 1.46 3.16 4.85 5.65 6.44 7.95 8.81 9.57 11.34 12.14 13.95 14.98 15.67 17.93 18.77</p> <p>Time (min)</p> <p>690.56</p> <p>676.48</p> <p>549.53 535.37 577.48 608.41 662.50 722.48 749.56 790.67 812.59 880.91 917.95 985.76 1072.45 1116.13 1155.26</p> <p>m/z</p> <p>NL: 442E.5<br/>m/z: 790.00<br/>791.00 MS<br/>4G</p> |



|            |     |                                 |                                               |
|------------|-----|---------------------------------|-----------------------------------------------|
| TSIGPTC    | 642 | F:\Other...data\TSIXPXC_1a_9e1a | 9/20/2011 3:02:46 PM                          |
| (dehydroT) | 624 | RT: 0.00 - 19.99                |                                               |
| +isoprene  | 710 |                                 | NL: 3.49E5<br>m/z = 642.00<br>643.00 MS<br>SA |
| +2isoprene | 778 | F:\Other...data\TSIXPXC_1a_9e1a | 9/20/2011 3:02:46 PM                          |
| dht+ipr    | 692 | RT: 0.00 - 19.99                |                                               |
| dht+2ipr   | 760 |                                 | NL: 4.94E5<br>m/z = 624.00<br>625.00 MS<br>SA |
|            |     | F:\Other...data\TSIXPXC_1a_9e1a | 9/20/2011 3:02:46 PM                          |
|            |     | RT: 0.00 - 19.99                |                                               |
|            |     |                                 | NL: 5.76E5<br>m/z = 725.00<br>720.00 MS<br>SA |
|            |     | F:\Other...data\TSIXPXC_1a_9e1a | 9/20/2011 3:02:46 PM                          |
|            |     | RT: 0.00 - 19.99                |                                               |
|            |     |                                 | NL: 2.49E5<br>m/z = 778.00<br>779.00 MS<br>SA |

|                              |                    |                                                                                                                                                                                                                                                                                                                                                                                                                                                                                                                                                 |
|------------------------------|--------------------|-------------------------------------------------------------------------------------------------------------------------------------------------------------------------------------------------------------------------------------------------------------------------------------------------------------------------------------------------------------------------------------------------------------------------------------------------------------------------------------------------------------------------------------------------|
|                              |                    | <p>F:\Other...data\TSIXPXC_1st_9e\5A 9/20/2011 3:02:46 PM</p> 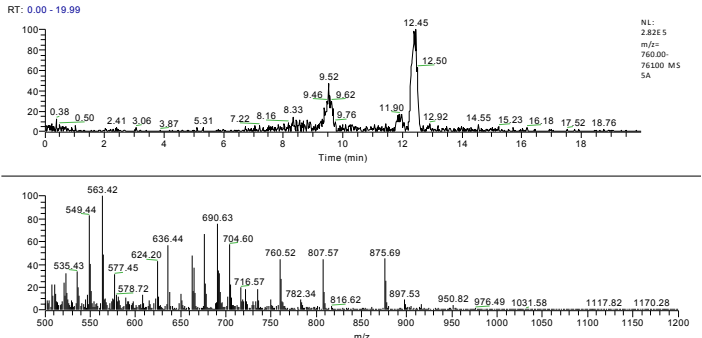 <p>RT: 0.00 - 19.99</p> <p>Time (min)</p> <p>563.42, 549.44, 636.44, 690.63, 704.60, 760.52, 807.57, 875.69</p> <p>m/z</p> <p>F:\Other...data\TSIXPXC_1st_9e\5A 9/20/2011 3:02:46 PM</p>  <p>RT: 0.00 - 19.99</p> <p>Time (min)</p> <p>671.41, 549.38, 624.25, 692.31, 704.62, 735.59, 807.43</p> <p>m/z</p> |
| <p>TSISPIC<br/>+isoprene</p> | <p>684<br/>752</p> | <p>F:\Other...data\TSIXPXC_1st_9e\5B 9/20/2011 3:29:49 PM</p>  <p>RT: 0.00 - 19.99</p> <p>Time (min)</p> <p>684.33, 562.21, 706.43, 747.42, 805.51, 838.61</p> <p>m/z</p> <p>F:\Other...data\TSIXPXC_1st_9e\5B 9/20/2011 3:29:49 PM</p>  <p>RT: 0.00 - 19.99</p> <p>Time (min)</p> <p>752.49, 684.39, 690.49, 774.41, 807.44, 867.95</p> <p>m/z</p>                      |

TSIGPVC  
 +isoprene  
 +2isoprene

640  
 708  
 776

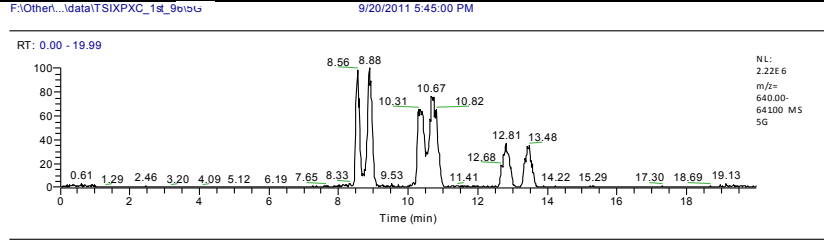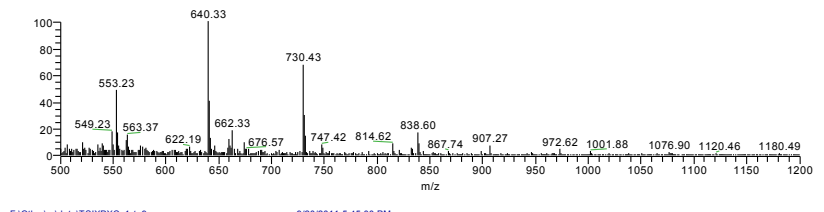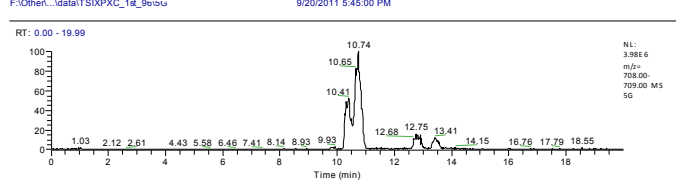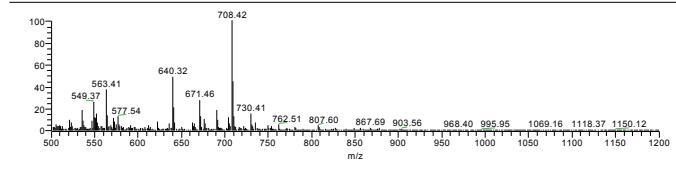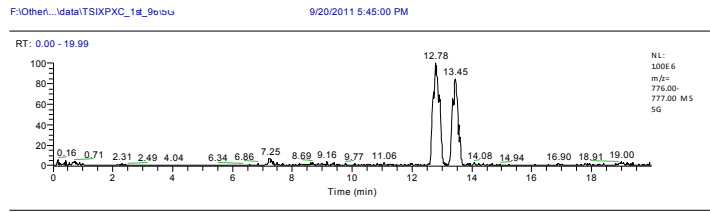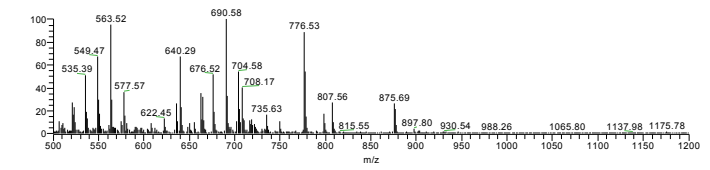

TSIVPLC  
 +isoprene  
 +2isoprene

696  
 764  
 832

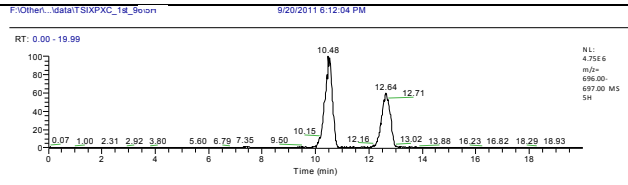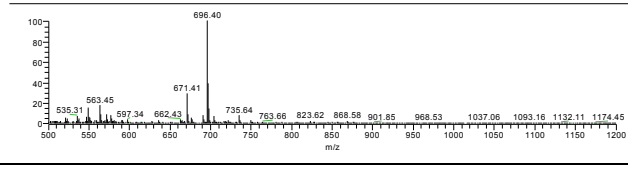

|                                             |                            |                                                                                                                                                                                                                                                                                                                                                                                                                                                                            |
|---------------------------------------------|----------------------------|----------------------------------------------------------------------------------------------------------------------------------------------------------------------------------------------------------------------------------------------------------------------------------------------------------------------------------------------------------------------------------------------------------------------------------------------------------------------------|
|                                             |                            | <p>F:\Other...data\TSIXPXC_1a_9e3h 9/20/2011 6:12:04 PM</p> 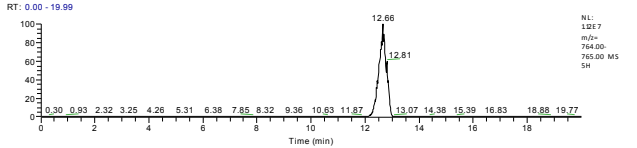  <p>F:\Other...data\TSIXPXC_1a_9e3h 9/20/2011 6:12:04 PM</p>          |
| <p>TSIPPYC<br/>+isoprene<br/>+2isoprene</p> | <p>744<br/>812<br/>880</p> | <p>F:\Other...data\TSIXPXC_1a_9e3a 9/20/2011 6:39:08 PM</p>   <p>F:\Other...data\TSIXPXC_1a_9e3a 9/20/2011 6:39:08 PM</p>   |

|                                    |                   |                                                                                                                                                                                                                                                                                           |
|------------------------------------|-------------------|-------------------------------------------------------------------------------------------------------------------------------------------------------------------------------------------------------------------------------------------------------------------------------------------|
|                                    |                   | <p>F:\Other...data\TSIXPXC_1st_9@v6A 9/20/2011 6:39:08 PM</p> <p>RT: 0.00 - 19.99</p> <p>NL: 185E5<br/>m/z: 880.00<br/>88100 MS<br/>6A</p>                                                                                                                                                |
| TSIVPWC<br>+isoprene               | 769<br>837        | <p>F:\Other...data\TSIXPXC_1st_9@v6U 9/20/2011 8:00:16 PM</p> <p>RT: 0.00 - 19.99</p> <p>NL: 3.96E5<br/>m/z: 769.00<br/>770.00 MS<br/>6D</p> <p>F:\Other...data\TSIXPXC_1st_9@v6U 9/20/2011 8:00:16 PM</p> <p>RT: 0.00 - 19.99</p> <p>NL: 4.66E5<br/>m/z: 837.00<br/>838.00 MS<br/>6D</p> |
| TSIGPYC<br>+isoprene<br>+2isoprene | 704<br>772<br>840 | <p>F:\Other...data\TSIXPXC_1st_9@v6e 9/20/2011 8:27:19 PM</p> <p>RT: 0.00 - 19.99</p> <p>NL: 4.8E6<br/>m/z: 704.00<br/>705.00 MS<br/>6E</p>                                                                                                                                               |

|                                             |                            |                                                                                                                                                                                                                                                                                                                                                                                                                                                                                                                                                                                                                                                                                                                                                                                   |
|---------------------------------------------|----------------------------|-----------------------------------------------------------------------------------------------------------------------------------------------------------------------------------------------------------------------------------------------------------------------------------------------------------------------------------------------------------------------------------------------------------------------------------------------------------------------------------------------------------------------------------------------------------------------------------------------------------------------------------------------------------------------------------------------------------------------------------------------------------------------------------|
|                                             |                            | <p>F:\Other...data\TSIXPXC_1st_9e0e2 9/20/2011 8:27:19 PM</p> <p>RT: 0.00 - 19.99</p> <p>10.20<br/>10.31</p> <p>NL:<br/>4.08E6<br/>m/z=<br/>772.00<br/>773.00 MS<br/>6E</p> <p>530.19<br/>549.34<br/>577.48<br/>646.55<br/>704.38<br/>721.52<br/>790.43<br/>822.56<br/>889.69<br/>932.78<br/>986.73<br/>1021.50<br/>1092.98<br/>1146.63<br/>1191.84</p> <p>F:\Other...data\TSIXPXC_1st_9e0e2 9/20/2011 8:27:19 PM</p> <p>RT: 0.00 - 19.99</p> <p>12.32<br/>12.44</p> <p>NL:<br/>7.04E5<br/>m/z=<br/>840.00<br/>841.00 MS<br/>6E</p> <p>511.24<br/>549.41<br/>563.48<br/>577.38<br/>581.44<br/>636.45<br/>676.55<br/>690.52<br/>704.62<br/>721.53<br/>735.49<br/>749.46<br/>808.64<br/>840.55<br/>875.71<br/>904.95<br/>961.88<br/>1015.42<br/>1063.22<br/>1116.19<br/>1154.00</p> |
| <p>TSIPPLC<br/>+isoprene</p>                | <p>762</p>                 | <p>F:\Other...data\TSIXPXC_1st_9e0e2 9/20/2011 8:27:19 PM</p> <p>RT: 0.00 - 19.99</p> <p>11.06<br/>11.17</p> <p>NL:<br/>1.38E5<br/>m/z=<br/>782.00<br/>783.00 MS<br/>6E</p> <p>721.56<br/>722.54<br/>723.56<br/>730.62<br/>735.57<br/>736.59<br/>743.65<br/>749.69<br/>750.66<br/>756.37<br/>762.49<br/>763.52<br/>770.58<br/>775.68<br/>778.55<br/>785.66<br/>790.48<br/>791.44</p>                                                                                                                                                                                                                                                                                                                                                                                              |
| <p>TSIDPIC<br/>+isoprene<br/>+2isoprene</p> | <p>712<br/>780<br/>848</p> | <p>F:\Other...data\TSIXPXC_1st_9e0e2 9/20/2011 9:21:23 PM</p> <p>RT: 0.00 - 19.99</p> <p>10.50<br/>10.39<br/>10.65<br/>10.70</p> <p>NL:<br/>4.35E5<br/>m/z=<br/>730.00-730.00<br/>MS 9E</p> <p>540.10<br/>553.31<br/>576.38<br/>636.15<br/>659.36<br/>671.29<br/>712.34<br/>727.44<br/>838.54<br/>821.43<br/>885.60<br/>907.10<br/>965.62<br/>1001.77<br/>1066.15<br/>1112.76<br/>1180.10</p>                                                                                                                                                                                                                                                                                                                                                                                     |

|                                                   |                                  |                                                                                                                                                                                                                                                                                                                                                                                                                                                                                                                                                                                                                                                                                                                                                                                                                                                                                                                                                                                               |
|---------------------------------------------------|----------------------------------|-----------------------------------------------------------------------------------------------------------------------------------------------------------------------------------------------------------------------------------------------------------------------------------------------------------------------------------------------------------------------------------------------------------------------------------------------------------------------------------------------------------------------------------------------------------------------------------------------------------------------------------------------------------------------------------------------------------------------------------------------------------------------------------------------------------------------------------------------------------------------------------------------------------------------------------------------------------------------------------------------|
|                                                   |                                  | <p>F:\Other...data\TSIXPXC_1st_9e1e1u 9/20/2011 9:21:23 PM</p> <p>RT: 0.00 - 19.99</p> <p>10.50</p> <p>10.36</p> <p>10.95 11.48 12.56 13.72 15.12 17.04 18.14 19.36</p> <p>Time (min)</p> <p>NL: 3.69E6<br/>m/z: 780.00-78100 MS<br/>6G</p> <p>780.50</p> <p>549.41 572.32 664.53 671.44 712.38 735.60 822.52 859.86 889.62 932.55 968.65 1078.88 1107.00 1183.25</p> <p>m/z</p> <p>F:\Other...data\TSIXPXC_1st_9e1e1u 9/20/2011 9:21:23 PM</p> <p>RT: 0.00 - 19.99</p> <p>12.56</p> <p>12.47 12.64 12.69</p> <p>0.12 1.03 2.31 2.25 3.89 5.59 7.42 8.20 8.93 9.69 10.17 12.33 13.12 14.70 15.60 17.09 19.13</p> <p>Time (min)</p> <p>NL: 3.44E5<br/>m/z: 848.00-849.00 MS<br/>6G</p> <p>690.54</p> <p>549.45 563.45 577.48 622.34 664.51 676.53 704.59 721.58 735.55 749.61 807.60 848.58 875.72 903.48 979.28 1032.80 1064.10 1142.46 1187.19</p> <p>m/z</p>                                                                                                                                |
| <p>TSIGPYC</p> <p>+isoprene</p> <p>+2isoprene</p> | <p>704</p> <p>772</p> <p>840</p> | <p>F:\Other...data\TSIXPXC_1st_9e1e1H 9/20/2011 9:48:27 PM</p> <p>13.91</p> <p>13.76 14.03 14.10 14.63 15.06 15.53 16.99 18.98</p> <p>0.21 1.02 1.57 2.20 3.47 4.85 6.20 7.99 8.78 8.87 10.84 10.87 11.17 12.71 13.50 13.91 14.03 14.10 14.63 15.06 15.53 16.99 18.98</p> <p>Time (min)</p> <p>NL: 2.63E6<br/>m/z: 704.00-705.00 MS<br/>6H</p> <p>730.40</p> <p>540.17 553.24 576.33 619.09 659.33 704.35 747.57 821.50 838.60 881.22 907.11 917.45 972.99 1001.63 1065.88 1121.37 1180.34</p> <p>m/z</p> <p>F:\Other...data\TSIXPXC_1st_9e1e1H 9/20/2011 9:48:27 PM</p> <p>RT: 0.00 - 19.99</p> <p>11.13</p> <p>11.46 13.59 14.86 15.56 16.99 18.19 19.20</p> <p>0.19 1.00 2.48 3.77 4.92 5.81 6.70 7.27 8.54 9.33 9.90 11.13 11.46 13.59 14.86 15.56 16.99 18.19 19.20</p> <p>Time (min)</p> <p>NL: 6.79E6<br/>m/z: 772.00-773.00 MS<br/>6H</p> <p>772.47</p> <p>549.42 577.63 636.45 690.56 704.46 721.53 772.47 790.45 824.70 889.58 919.65 981.28 1061.97 1157.26 1187.31</p> <p>m/z</p> |

|                                                   |                                  |                                                                                                                                                                                                                                                                                                                                                                                                                                                                                                                                                                                                                                                                                                                                                                                                    |
|---------------------------------------------------|----------------------------------|----------------------------------------------------------------------------------------------------------------------------------------------------------------------------------------------------------------------------------------------------------------------------------------------------------------------------------------------------------------------------------------------------------------------------------------------------------------------------------------------------------------------------------------------------------------------------------------------------------------------------------------------------------------------------------------------------------------------------------------------------------------------------------------------------|
|                                                   |                                  | <p>F:\Other...data\TSIXPXC_1st_9e\evr 9/20/2011 9:48:27 PM</p> <p>RT: 0.00 - 19.99</p> 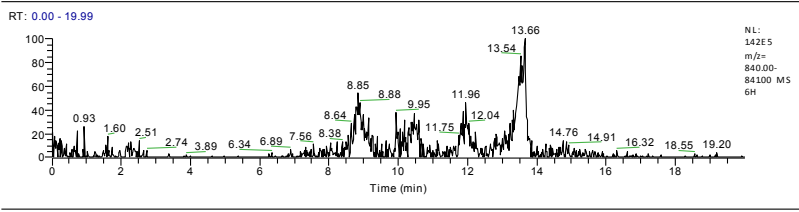                                                                                                                                                                                                                                                                                                                                                                                                                                                                                                                                        |
| <p>TSIPPVC</p> <p>+isoprene</p> <p>+2isoprene</p> | <p>680</p> <p>748</p> <p>816</p> | <p>F:\Other...data\TSIXPXC_1st_9e\evr 9/21/2011 10:47:57 AM</p> <p>RT: 0.00 - 19.99</p>   <p>F:\Other...data\TSIXPXC_1st_9e\evr 9/21/2011 10:47:57 AM</p> <p>RT: 0.00 - 19.99</p>   <p>F:\Other...data\TSIXPXC_1st_9e\evr 9/21/2011 10:47:57 AM</p> <p>RT: 0.00 - 19.99</p>   |



TSIGPVC  
 +isoprene  
 +2isoprene

640

708

776

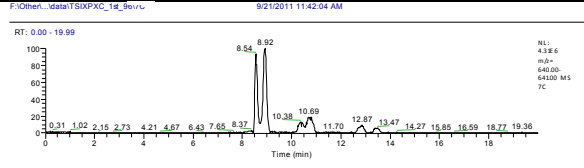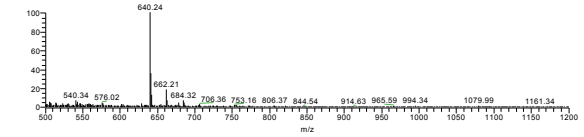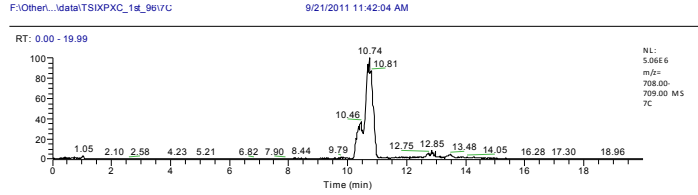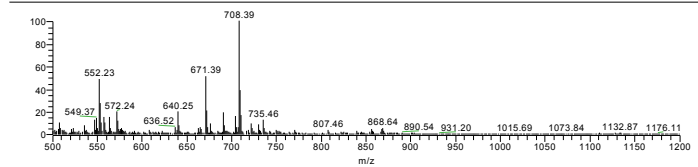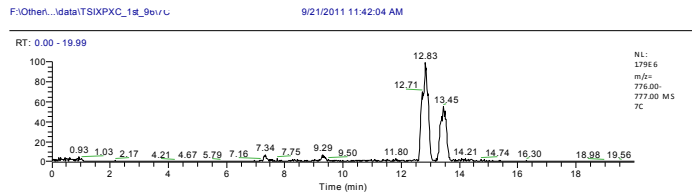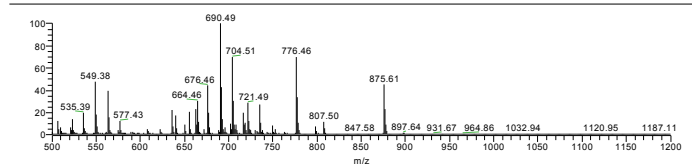

TSILPWC  
 +isoprene

783

851

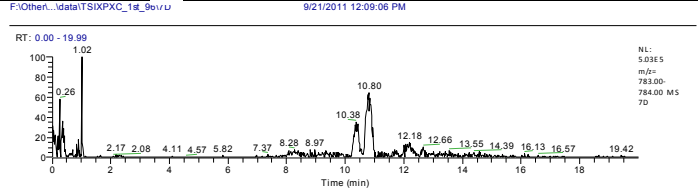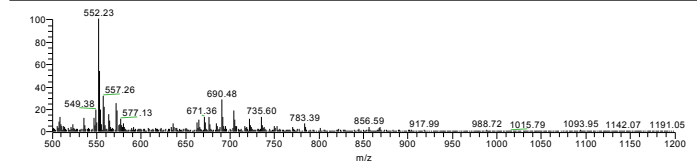

|            |     |                                                                                         |
|------------|-----|-----------------------------------------------------------------------------------------|
|            |     | <p>F:\Other...data\TSIXPXC_1st_961v.r 9/21/2011 12:09:06 PM</p> <p>RT: 0.00 - 19.99</p> |
| TSILPSC    | 684 | <p>F:\Other...data\TSIXPXC_1st_961v.r 9/21/2011 1:03:13 PM</p> <p>RT: 0.00 - 19.99</p>  |
| (dehydroS) | 666 |                                                                                         |
| +isoprene  | 752 |                                                                                         |
| +2isoprene | 820 |                                                                                         |
| dhs+ipr    | 734 |                                                                                         |
| dhs+2ipr   | 802 |                                                                                         |
|            |     | <p>F:\Other...data\TSIXPXC_1st_961v.r 9/21/2011 1:03:13 PM</p> <p>RT: 0.00 - 19.99</p>  |
|            |     | <p>F:\Other...data\TSIXPXC_1st_961v.r 9/21/2011 1:03:13 PM</p> <p>RT: 0.00 - 19.99</p>  |

|                                                   |                                  |                                                                                                                                                                                                                                                                                                                                                                                                                                                                                                                                                                                                                                                                                                                                                                                         |
|---------------------------------------------------|----------------------------------|-----------------------------------------------------------------------------------------------------------------------------------------------------------------------------------------------------------------------------------------------------------------------------------------------------------------------------------------------------------------------------------------------------------------------------------------------------------------------------------------------------------------------------------------------------------------------------------------------------------------------------------------------------------------------------------------------------------------------------------------------------------------------------------------|
|                                                   |                                  | <p>F:\Other...data\TSIXPXC_1st_9617F 9/21/2011 1:03:13 PM</p> <p>RT: 0.00 - 19.99</p> 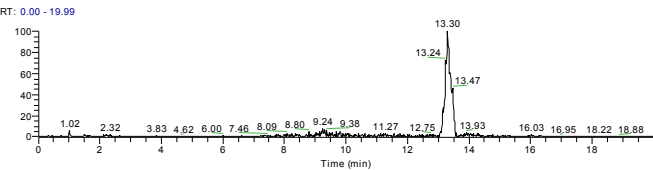  <p>F:\Other...data\TSIXPXC_1st_9617F 9/21/2011 1:03:13 PM</p> <p>RT: 0.00 - 19.99</p>   <p>F:\Other...data\TSIXPXC_1st_9617F 9/21/2011 1:03:13 PM</p> <p>RT: 0.00 - 19.99</p>   |
| <p>TSITPQC</p> <p>+isoprene</p> <p>+2isoprene</p> | <p>713</p> <p>781</p> <p>849</p> | <p>F:\Other...data\TSIXPXC_1st_9617H 9/21/2011 1:57:18 PM</p> <p>RT: 0.00 - 19.99</p>                                                                                                                                                                                                                                                                                                                                                                                                                                                                                                                           |

|                                                           |  |                                                                                                                                                                                                                                                                                                                                                                                                                                                                                                               |
|-----------------------------------------------------------|--|---------------------------------------------------------------------------------------------------------------------------------------------------------------------------------------------------------------------------------------------------------------------------------------------------------------------------------------------------------------------------------------------------------------------------------------------------------------------------------------------------------------|
|                                                           |  | <p>F:\Other...data\TSIXPXC_1d_901.rn 9/21/2011 1:57:18 PM</p> 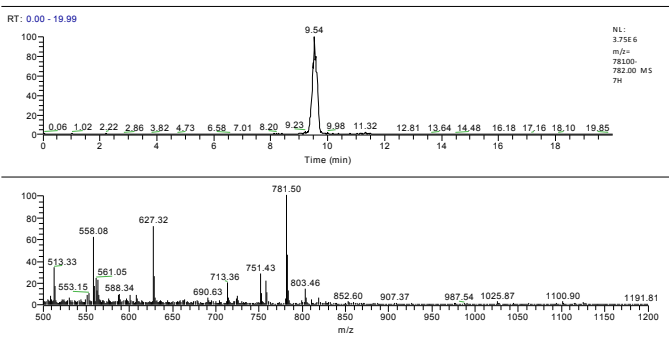 <p>RT: 0.00 - 19.99</p> <p>9.54</p> <p>NI: 3.75E4<br/>m/z: 781.00<br/>782.00 MS<br/>7H</p> <p>F:\Other...data\TSIXPXC_1d_901.rn 9/21/2011 1:57:18 PM</p>  <p>RT: 0.00 - 19.99</p> <p>11.20 11.30</p> <p>NI: 2.64E5<br/>m/z: 849.00<br/>850.00 MS<br/>7H</p>                |
| <p>TSISPFC</p> <p>+isoprene 786</p> <p>+2isoprene 854</p> |  | <p>F:\Other...data\TSIXPXC_1d_901a.rn 9/21/2011 2:25:42 PM</p>  <p>RT: 0.00 - 19.99</p> <p>9.41 9.55 9.60</p> <p>NI: 7.26E5<br/>m/z: 786.00<br/>787.00 MS<br/>8A</p> <p>F:\Other...data\TSIXPXC_1d_901a.rn 9/21/2011 2:25:42 PM</p>  <p>RT: 0.00 - 19.99</p> <p>13.40 13.50</p> <p>NI: 2.34E5<br/>m/z: 854.00<br/>855.00 MS<br/>8A</p> |

|                                                                                                  |  |                                                                                                                                                                                                                                                                                                                                                                                                                                                                                                                   |
|--------------------------------------------------------------------------------------------------|--|-------------------------------------------------------------------------------------------------------------------------------------------------------------------------------------------------------------------------------------------------------------------------------------------------------------------------------------------------------------------------------------------------------------------------------------------------------------------------------------------------------------------|
| <p>TSIQPNC</p> <p>+isoprene 794</p>                                                              |  | <p>F:\Other...data\TSIXPXC_1st_9e10u 9/21/2011 2:52:39 PM</p> <p>RT: 0.00 - 19.99</p> <p>Time (min)</p> <p>m/z</p> <p>NL: 1.88E5<br/>m/z: 794.00<br/>795.00 MS<br/>88</p>                                                                                                                                                                                                                                                                                                                                         |
| <p>TSIAPSC</p> <p>+isoprene 710</p> <p>+2isoprene 784</p> <p>dhs+ipr 732</p> <p>dhs+2ipr 804</p> |  | <p>F:\Other...data\TSIXPXC_1st_9e10u 9/21/2011 3:46:48 PM</p> <p>RT: 0.00 - 19.99</p> <p>Time (min)</p> <p>m/z</p> <p>NL: 5.33E5<br/>m/z: 783.00-710.00<br/>MS 8D</p> <p>F:\Other...data\TSIXPXC_1st_9e10u 9/21/2011 3:46:48 PM</p> <p>RT: 0.00 - 19.99</p> <p>Time (min)</p> <p>m/z</p> <p>NL: 2.26E5<br/>m/z: 778.00-779.00 MS<br/>8D</p> <p>F:\Other...data\TSIXPXC_1st_9e10u 9/21/2011 3:46:48 PM</p> <p>RT: 0.00 - 19.99</p> <p>Time (min)</p> <p>m/z</p> <p>NL: 4.32E5<br/>m/z: 760.00-765.00 MS<br/>8D</p> |

|                                                                                      |  |                                                                                                                                                                                                                                                                                                                                                                                                                                                                                                                                                                                                                                                                                                                                                                                                |
|--------------------------------------------------------------------------------------|--|------------------------------------------------------------------------------------------------------------------------------------------------------------------------------------------------------------------------------------------------------------------------------------------------------------------------------------------------------------------------------------------------------------------------------------------------------------------------------------------------------------------------------------------------------------------------------------------------------------------------------------------------------------------------------------------------------------------------------------------------------------------------------------------------|
|                                                                                      |  | <p>F:\Other...data\TSIXPXC_1st_9618U 9/21/2011 3:46:48 PM</p> 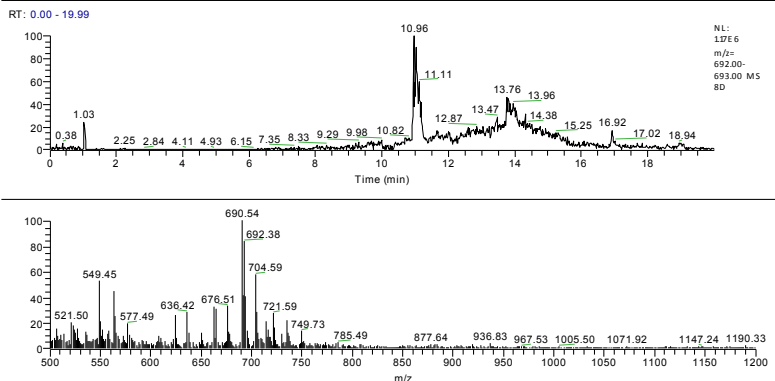 <p>RT: 0.00 - 19.99</p> <p>NL: 1.07E6<br/>m/z= 692.00-<br/>693.00 MS<br/>8D</p> <p>Time (min)</p> <p>m/z</p>                                                                                                                                                                                                                                                                                                                                                                                                                                                                                                                                  |
| <p>TSISPTC<br/>(dehydroT) 654<br/>+isoprene 740<br/>dht+ipr 722<br/>dht+2ipr 790</p> |  | <p>F:\Other...data\TSIXPXC_1st_9618U 9/21/2011 5:07:52 PM</p>  <p>RT: 0.00 - 19.99</p> <p>NL: 5.85E5<br/>m/z= 654.00-<br/>655.00 MS<br/>8G</p> <p>Time (min)</p> <p>m/z</p> <p>F:\Other...data\TSIXPXC_1st_9618G 9/21/2011 5:07:52 PM</p>  <p>RT: 0.00 - 19.99</p> <p>NL: 6.59E5<br/>m/z= 740.00-<br/>741.00 MS<br/>8G</p> <p>Time (min)</p> <p>m/z</p> <p>F:\Other...data\TSIXPXC_1st_9618U 9/21/2011 5:07:52 PM</p>  <p>RT: 0.00 - 19.99</p> <p>NL: 2.72E5<br/>m/z= 790.00-<br/>791.00 MS<br/>8G</p> <p>Time (min)</p> <p>m/z</p> |

|                                             |                            |                                                                                                                                                                                                                                                                                                                                                                                                                                                                                                                                                                                                                                                                                                                         |
|---------------------------------------------|----------------------------|-------------------------------------------------------------------------------------------------------------------------------------------------------------------------------------------------------------------------------------------------------------------------------------------------------------------------------------------------------------------------------------------------------------------------------------------------------------------------------------------------------------------------------------------------------------------------------------------------------------------------------------------------------------------------------------------------------------------------|
|                                             |                            | <p>F:\Other...data\TSIXPXC_1st_9e1e1e 9/21/2011 5:07:52 PM</p> 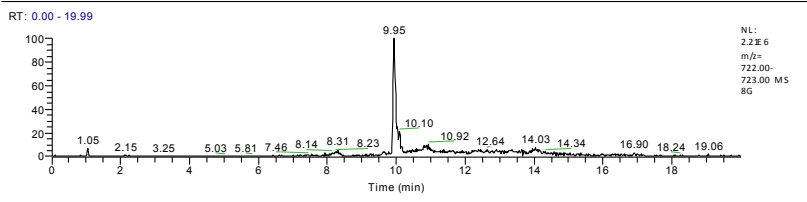                                                                                                                                                                                                                                                                                                                                                                                                                                                                                     |
| <p>TSIAPVC<br/>+isoprene<br/>+2isoprene</p> | <p>654<br/>722<br/>790</p> | <p>F:\Other...data\TSIXPXC_1st_9e1e1e 9/21/2011 5:34:57 PM</p>   <p>F:\Other...data\TSIXPXC_1st_9e1e1e 9/21/2011 5:34:57 PM</p>   <p>F:\Other...data\TSIXPXC_1st_9e1e1e 9/21/2011 5:34:57 PM</p>   |

|            |     |                                                        |
|------------|-----|--------------------------------------------------------|
| TSIPPVC    | 680 | F:\Other...data\TSIXPXC_1st_9000A 9/22/2011 9:29:10 AM |
| +isoprene  | 748 |                                                        |
| +2isoprene | 816 |                                                        |
|            |     | F:\Other...data\TSIXPXC_1st_9000A 9/22/2011 9:29:10 AM |
|            |     |                                                        |
|            |     |                                                        |
|            |     | F:\Other...data\TSIXPXC_1st_9000A 9/22/2011 9:29:10 AM |
|            |     |                                                        |
|            |     |                                                        |
| TSIGPYC    | 704 | F:\Other...data\TSIXPXC_1st_9000A 9/22/2011 9:56:14 AM |
| +isoprene  | 772 |                                                        |
| +2isoprene | 840 |                                                        |



|                                             |                            |                                                                                                                                                                                                                                         |
|---------------------------------------------|----------------------------|-----------------------------------------------------------------------------------------------------------------------------------------------------------------------------------------------------------------------------------------|
|                                             |                            | <p>F:\Other...data\TSIXPXC_1st_9e\9s 9/22/2011 9:56:14 AM</p> <p>RT: 0.00 - 19.99</p> <p>Time (min)</p> <p>m/z</p> <p>F:\Other...data\TSIXPXC_1st_9e\9s 9/22/2011 9:56:14 AM</p> <p>RT: 0.00 - 19.99</p> <p>Time (min)</p> <p>m/z</p>   |
| <p>TSIGPYC<br/>+isoprene<br/>+2isoprene</p> | <p>704<br/>772<br/>840</p> | <p>F:\Other...data\TSIXPXC_1st_9e\9c 9/22/2011 10:23:18 AM</p> <p>RT: 0.00 - 19.99</p> <p>Time (min)</p> <p>m/z</p> <p>F:\Other...data\TSIXPXC_1st_9e\9c 9/22/2011 10:23:18 AM</p> <p>RT: 0.00 - 19.99</p> <p>Time (min)</p> <p>m/z</p> |

|                                                   |                                  |                                                                                                                                                                                                                                                                                                                                                                                                                                                                                                                                                                                                                                                                                                                                                                                                                                                                                                                                                                                                                                                                                                                                                                                                                                                                                                                                                                                                                                                                                                                                                                                                                                                                         |
|---------------------------------------------------|----------------------------------|-------------------------------------------------------------------------------------------------------------------------------------------------------------------------------------------------------------------------------------------------------------------------------------------------------------------------------------------------------------------------------------------------------------------------------------------------------------------------------------------------------------------------------------------------------------------------------------------------------------------------------------------------------------------------------------------------------------------------------------------------------------------------------------------------------------------------------------------------------------------------------------------------------------------------------------------------------------------------------------------------------------------------------------------------------------------------------------------------------------------------------------------------------------------------------------------------------------------------------------------------------------------------------------------------------------------------------------------------------------------------------------------------------------------------------------------------------------------------------------------------------------------------------------------------------------------------------------------------------------------------------------------------------------------------|
|                                                   |                                  | <p>F:\Other...data\TSIXPXC_1d_9e9u 9/22/2011 10:23:18 AM</p> 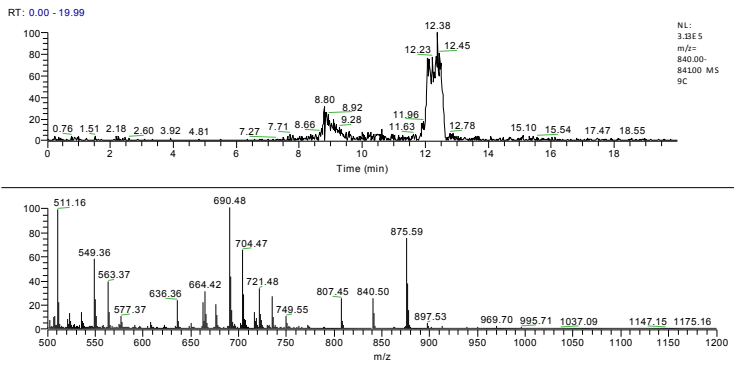 <p>RT: 0.00 - 19.99</p> <p>100<br/>80<br/>60<br/>40<br/>20<br/>0</p> <p>0.76 1.51 2.18 2.60 3.92 4.81 7.27 7.71 8.66 8.80 8.92 9.28 11.63 11.96 12.23 12.38 12.45 12.78 15.10 15.54 17.47 18.55</p> <p>Time (min)</p> <p>100<br/>80<br/>60<br/>40<br/>20<br/>0</p> <p>500 550 600 650 700 750 800 850 900 950 1000 1050 1100 1150 1200</p> <p>m/z</p> <p>NL: 3.38E5<br/>m/z= 840.00-<br/>84100 MS<br/>9C</p>                                                                                                                                                                                                                                                                                                                                                                                                                                                                                                                                                                                                                                                                                                                                                                                                                                                                                                                                                                                                                                                                                                            |
| <p>TSITPMC</p> <p>+isoprene</p> <p>+2isoprene</p> | <p>716</p> <p>784</p> <p>852</p> | <p>F:\Other...data\TSIXPXC_1d_9e9u 9/22/2011 10:50:18 AM</p>  <p>RT: 0.00 - 19.99</p> <p>100<br/>80<br/>60<br/>40<br/>20<br/>0</p> <p>1.02 2.22 2.73 4.76 5.83 6.84 7.54 8.69 8.95 10.02 10.82 10.91 12.66 13.02 13.86 14.03 15.01 16.90 18.95</p> <p>Time (min)</p> <p>100<br/>80<br/>60<br/>40<br/>20<br/>0</p> <p>500 550 600 650 700 750 800 850 900 950 1000 1050 1100 1150 1200</p> <p>m/z</p> <p>NL: 3.87E6<br/>m/z= 785.00-77.00<br/>MS 9D</p> <p>F:\Other...data\TSIXPXC_1d_9e9u 9/22/2011 10:50:18 AM</p>  <p>RT: 0.00 - 19.99</p> <p>100<br/>80<br/>60<br/>40<br/>20<br/>0</p> <p>1.00 2.29 3.16 4.42 5.02 6.24 7.06 7.59 9.02 9.62 10.65 10.81 11.15 12.64 13.57 14.50 15.72 16.95 18.57 19.38</p> <p>Time (min)</p> <p>100<br/>80<br/>60<br/>40<br/>20<br/>0</p> <p>500 550 600 650 700 750 800 850 900 950 1000 1050 1100 1150 1200</p> <p>m/z</p> <p>NL: 5.45E6<br/>m/z= 784.00-<br/>785.00 MS<br/>9D</p> <p>F:\Other...data\TSIXPXC_1d_9e9u 9/22/2011 10:50:18 AM</p>  <p>RT: 0.00 - 19.99</p> <p>100<br/>80<br/>60<br/>40<br/>20<br/>0</p> <p>0.66 1.58 2.20 2.39 4.01 4.86 6.89 7.66 7.87 8.13 8.81 8.99 9.12 9.26 9.71 9.90 11.89 12.80 13.67 13.85 14.93 16.85 17.62 19.31</p> <p>Time (min)</p> <p>100<br/>80<br/>60<br/>40<br/>20<br/>0</p> <p>500 550 600 650 700 750 800 850 900 950 1000 1050 1100 1150 1200</p> <p>m/z</p> <p>NL: 1.88E5<br/>m/z= 852.00-<br/>853.00 MS<br/>9D</p> |

TSIYPSC 734  
 (dehydroS) 716  
 +isoprene 802  
 dhS+ipr 784

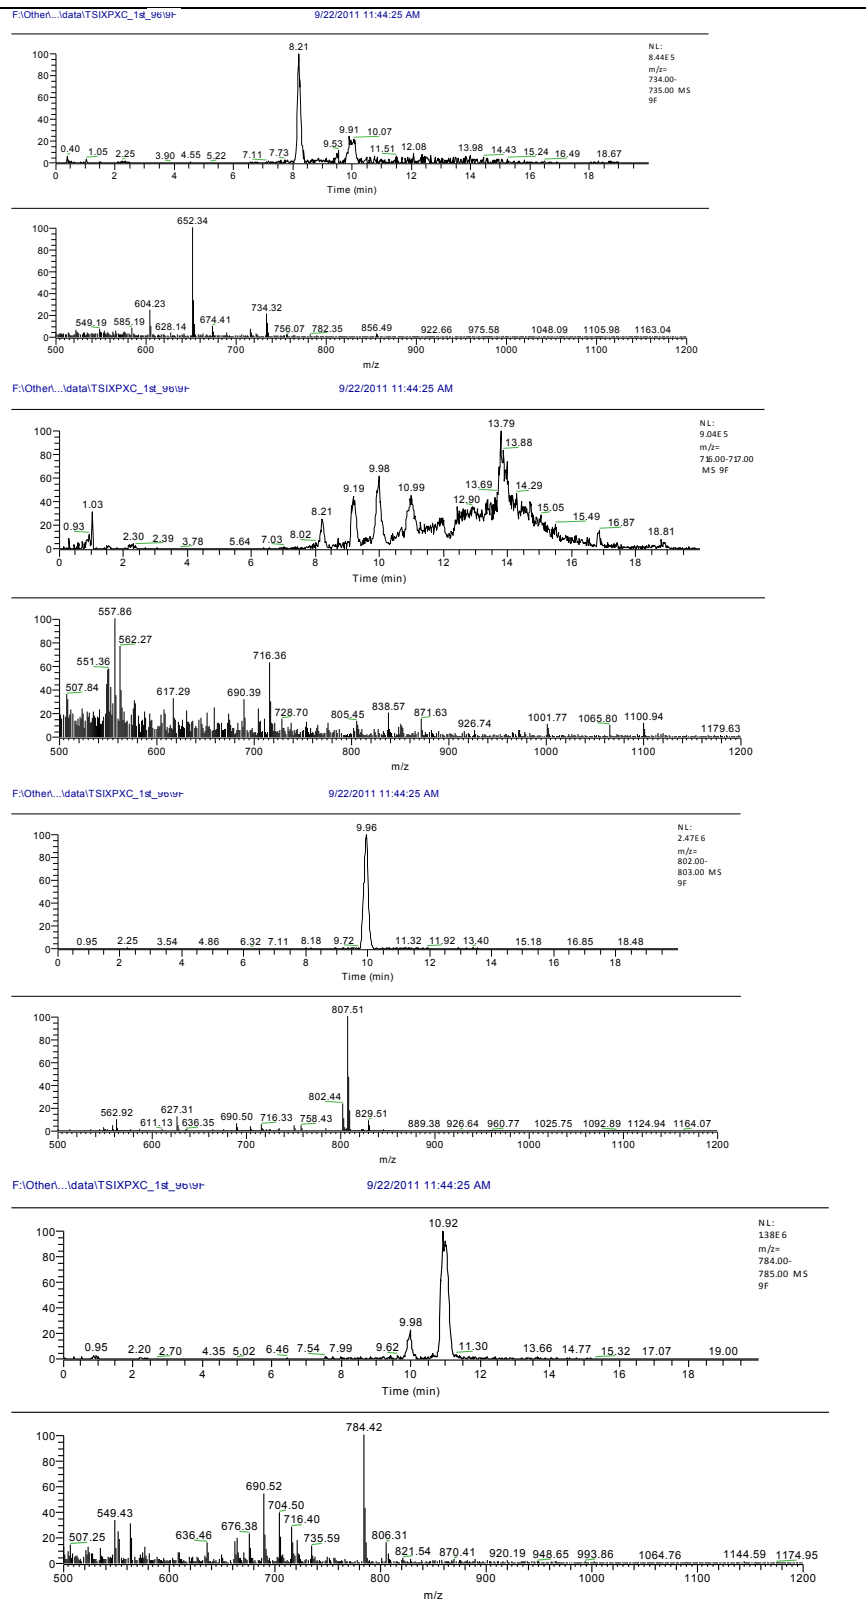

|                                                   |                                  |                                                                                                                                                                                                                                                                                                                                                                                                                                                                                                                                                                                                                                                                                                                                                                                                                                                              |
|---------------------------------------------------|----------------------------------|--------------------------------------------------------------------------------------------------------------------------------------------------------------------------------------------------------------------------------------------------------------------------------------------------------------------------------------------------------------------------------------------------------------------------------------------------------------------------------------------------------------------------------------------------------------------------------------------------------------------------------------------------------------------------------------------------------------------------------------------------------------------------------------------------------------------------------------------------------------|
| <p>TSITPVC</p> <p>+isoprene</p> <p>+2isoprene</p> | <p>684</p> <p>752</p> <p>820</p> | <p>F:\Other...data\TSIXPXC_1st_90999 9/22/2011 12:38:29 PM</p> 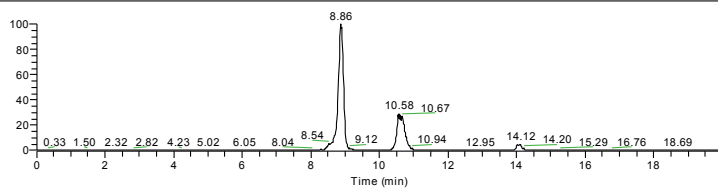 <p>NL: 12E7<br/>m/z= 684.00-685.00 MS 9H</p>  <p>F:\Other...data\TSIXPXC_1st_90999 9/22/2011 12:38:29 PM</p>  <p>NL: 190E7<br/>m/z= 752.00-753.00 MS 9H</p>  <p>F:\Other...data\TSIXPXC_1st_90999 9/22/2011 12:38:29 PM</p>  <p>NL: 238E6<br/>m/z= 820.00-821.00 MS 9H</p>  |
| <p>TSIQPLC</p> <p>+isoprene</p> <p>+2isoprene</p> | <p>725</p> <p>793</p> <p>861</p> | <p>F:\Other...data\TSIXPXC_1st_90110A 9/22/2011 1:05:33 PM</p>  <p>NL: 24E6<br/>m/z= 725.00-726.00 MS 9A</p>                                                                                                                                                                                                                                                                                                                                                                                                                                                                                                                                                                         |

|                                    |                   |                                                                                                                                                                                                                                                                                                       |
|------------------------------------|-------------------|-------------------------------------------------------------------------------------------------------------------------------------------------------------------------------------------------------------------------------------------------------------------------------------------------------|
|                                    |                   | <p>F:\Other...data\TSIXPXC_1f_96110A 9/22/2011 1:05:33 PM</p> <p>Time (min)</p> <p>NI: 3.33E6<br/>m/z: 793.00<br/>794.00 MS<br/>DA</p> <p>m/z</p> <p>F:\Other...data\TSIXPXC_1f_96110A 9/22/2011 1:05:33 PM</p> <p>Time (min)</p> <p>NI: 4.33E5<br/>m/z: 86100-<br/>862.00 MS<br/>DA</p> <p>m/z</p>   |
| TSIFPWC<br>+isoprene               | 885               | <p>F:\Other...data\TSIXPXC_1f_96110C 9/22/2011 1:39:36 PM</p> <p>Time (min)</p> <p>NI: 8.40E4<br/>m/z: 885.00-<br/>886.00 MS<br/>DC</p> <p>m/z</p>                                                                                                                                                    |
| TSIHPVC<br>+isoprene<br>+2isoprene | 720<br>788<br>856 | <p>F:\Other...data\TSIXPXC_1f_96110C 9/22/2011 2:33:45 PM</p> <p>Time (min)</p> <p>NI: 1.86E6<br/>m/z: 720.00-<br/>722.00 MS<br/>DC</p> <p>m/z</p> <p>F:\Other...data\TSIXPXC_1f_96110C 9/22/2011 2:33:45 PM</p> <p>Time (min)</p> <p>NI: 1.86E7<br/>m/z: 788.00-<br/>789.00 MS<br/>DC</p> <p>m/z</p> |

|            |     |                                                              |
|------------|-----|--------------------------------------------------------------|
|            |     | <p>F:\Other_data\TSIXPXC_1st_96\10E 9/22/2011 2:33:45 PM</p> |
| TSIAPYC    | 718 | <p>F:\Other_data\TSIXPXC_1st_96\10F 9/22/2011 3:00:47 PM</p> |
| +isoprene  | 786 |                                                              |
| +2isoprene | 854 |                                                              |
|            |     | <p>F:\Other_data\TSIXPXC_1st_96\10F 9/22/2011 3:00:47 PM</p> |
|            |     | <p>F:\Other_data\TSIXPXC_1st_96\10F 9/22/2011 3:00:47 PM</p> |

|            |     |                                                                                                                                                                                                                                                                                                                                                                                                                                                                                                                                                                                                                                                                                                                   |
|------------|-----|-------------------------------------------------------------------------------------------------------------------------------------------------------------------------------------------------------------------------------------------------------------------------------------------------------------------------------------------------------------------------------------------------------------------------------------------------------------------------------------------------------------------------------------------------------------------------------------------------------------------------------------------------------------------------------------------------------------------|
| TSIVPVC    | 682 | <p>F:\Other...data\TSIXPXC_1st_96110G 9/22/2011 3:27:51 PM</p> 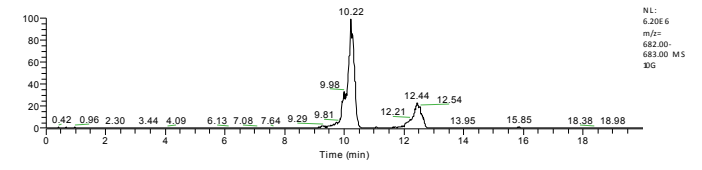  <p>F:\Other...data\TSIXPXC_1st_96110G 9/22/2011 3:27:51 PM</p>   <p>F:\Other...data\TSIXPXC_1st_96110G 9/22/2011 3:27:51 PM</p>   |
| +isoprene  | 750 |                                                                                                                                                                                                                                                                                                                                                                                                                                                                                                                                                                                                                                                                                                                   |
| +2isoprene | 818 |                                                                                                                                                                                                                                                                                                                                                                                                                                                                                                                                                                                                                                                                                                                   |
| TSISPNC    | 754 | <p>F:\Other...data\TSIXPXC_1st_96110H 9/22/2011 3:54:54 PM</p>   <p>10H#548 RT: 9.40 AV: 1 NL: 3.61E6<br/>T: + e-ESI Q1MS (500.000-1200.000)</p>                                                                                                                                                                                                                                                                                                                                                                                          |
| +isoprene  | 754 |                                                                                                                                                                                                                                                                                                                                                                                                                                                                                                                                                                                                                                                                                                                   |
| +2isoprene | 821 |                                                                                                                                                                                                                                                                                                                                                                                                                                                                                                                                                                                                                                                                                                                   |

|                                             |                            |                                                                                                                                                                                                                                                                                                                                                                                                                                                           |
|---------------------------------------------|----------------------------|-----------------------------------------------------------------------------------------------------------------------------------------------------------------------------------------------------------------------------------------------------------------------------------------------------------------------------------------------------------------------------------------------------------------------------------------------------------|
|                                             |                            | <p>F:\Other...data\TSIXPXC_1st_9610H 9/22/2011 3:54:54 PM</p> 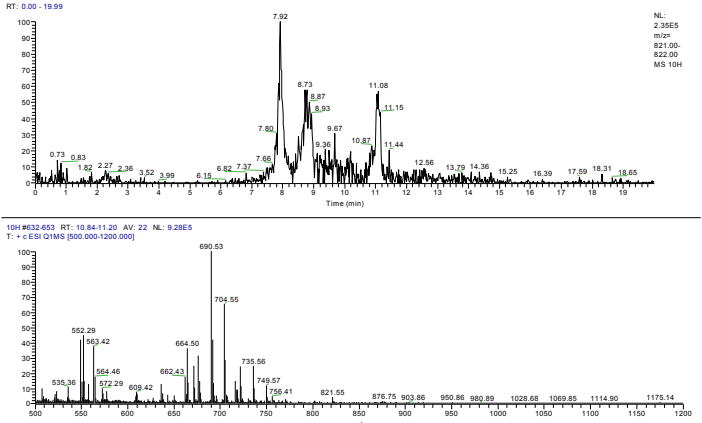 <p>10H#622 663 RT: 10.84-11.20 AV: 22 NL: 9.28E5<br/>T: + c ESI Q1MS [500.000-1200.000]</p>                                                                                                                                                                                                              |
| <p>TSIIPAC<br/>+isoprene<br/>+2isoprene</p> | <p>668<br/>736<br/>804</p> | <p>F:\Other...data\TSIXPXC_1st_96111B 9/22/2011 4:48:58 PM</p>  <p>F:\Other...data\TSIXPXC_1st_96111B 9/22/2011 4:48:58 PM</p>  <p>F:\Other...data\TSIXPXC_1st_96111B 9/22/2011 4:48:58 PM</p>  |



|                                                   |                                  |                                                                                                                                                                                                                                                                                                                                                                                                                                                                                                                                                                                                                                                                                                                                                                                                                                                                         |
|---------------------------------------------------|----------------------------------|-------------------------------------------------------------------------------------------------------------------------------------------------------------------------------------------------------------------------------------------------------------------------------------------------------------------------------------------------------------------------------------------------------------------------------------------------------------------------------------------------------------------------------------------------------------------------------------------------------------------------------------------------------------------------------------------------------------------------------------------------------------------------------------------------------------------------------------------------------------------------|
| <p>TSIIPAC</p> <p>+isoprene</p> <p>+2isoprene</p> | <p>668</p> <p>736</p> <p>804</p> | <p>F:\Other...data\TSIXPXC_18_96111C 9/22/2011 5:16:00 PM</p> 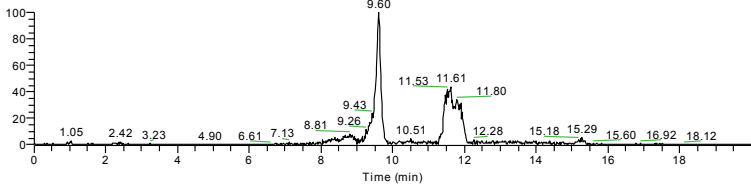 <p>NL: 154E6<br/>m/z= 668.00-669.00 MS<br/>IC</p>  <p>F:\Other...data\TSIXPXC_18_96111C 9/22/2011 5:16:00 PM</p>  <p>NL: 3.99E6<br/>m/z= 736.00-737.00 MS<br/>IC</p>  <p>F:\Other...data\TSIXPXC_18_96111C 9/22/2011 5:16:00 PM</p>  <p>NL: 8.38E5<br/>m/z= 804.00-805.00 MS<br/>IC</p>  |
| <p>TSITPLC</p> <p>+isoprene</p> <p>+2isoprene</p> | <p>698</p> <p>766</p> <p>834</p> | <p>F:\Other...data\TSIXPXC_18_96111D 9/22/2011 5:43:02 PM</p>  <p>NL: 3.93E6<br/>m/z= 698.00-699.00 MS<br/>ID</p>                                                                                                                                                                                                                                                                                                                                                                                                                                                                                                                                                                               |

|                                             |                            |                                                                                                                                                                                                                                                                                                                                                                                                                                                                                       |
|---------------------------------------------|----------------------------|---------------------------------------------------------------------------------------------------------------------------------------------------------------------------------------------------------------------------------------------------------------------------------------------------------------------------------------------------------------------------------------------------------------------------------------------------------------------------------------|
|                                             |                            | <p>F:\Other...data\TSIXPXC_1st_961111.D 9/22/2011 5:43:02 PM</p> 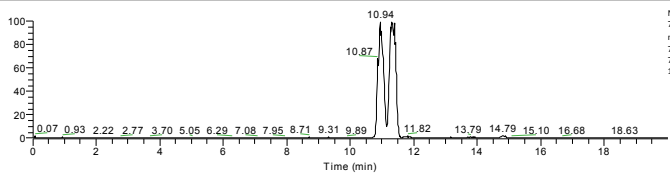  <p>F:\Other...data\TSIXPXC_1st_961111.D 9/22/2011 5:43:02 PM</p>           |
| <p>TSIQPQC<br/>+isoprene<br/>+2isoprene</p> | <p>740<br/>808<br/>876</p> | <p>F:\Other...data\TSIXPXC_1st_961128.D 9/22/2011 8:25:17 PM</p>   <p>F:\Other...data\TSIXPXC_1st_961128.D 9/22/2011 8:25:17 PM</p>   |

|                                             |                            |                                                                                                                                                                                              |
|---------------------------------------------|----------------------------|----------------------------------------------------------------------------------------------------------------------------------------------------------------------------------------------|
|                                             |                            | <p>F:\Other...data\TSIXPXC_18_9611.zC 9/22/2011 8:25:17 PM</p>                                                                                                                               |
| <p>TSIVPAC<br/>+isoprene<br/>+2isoprene</p> | <p>654<br/>722<br/>790</p> | <p>F:\Other...data\TSIXPXC_18_9611.zC 9/22/2011 8:52:19 PM</p> <p>F:\Other...data\TSIXPXC_18_9611.zC 9/22/2011 8:52:19 PM</p> <p>F:\Other...data\TSIXPXC_18_9611.zC 9/22/2011 8:52:19 PM</p> |

TSIQPLC 725  
 +isoprene 793  
 +2isoprene 861

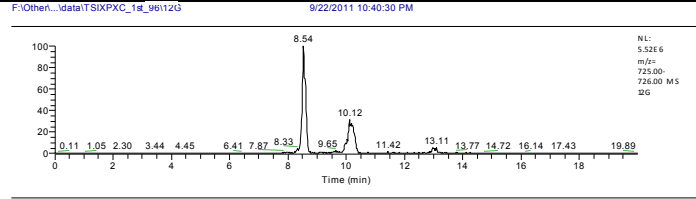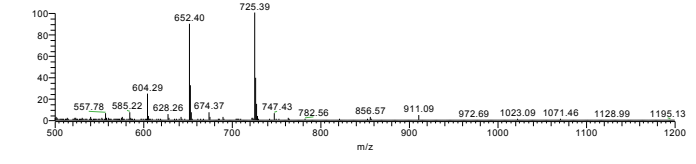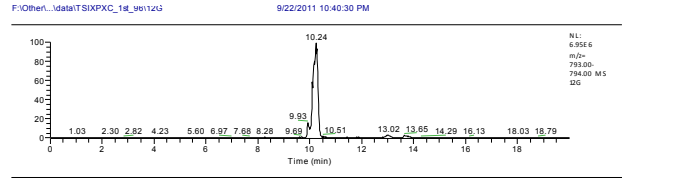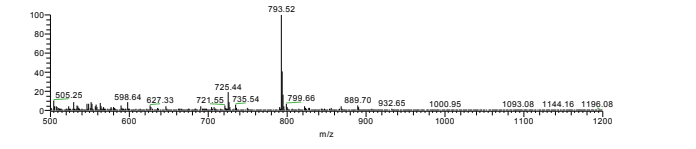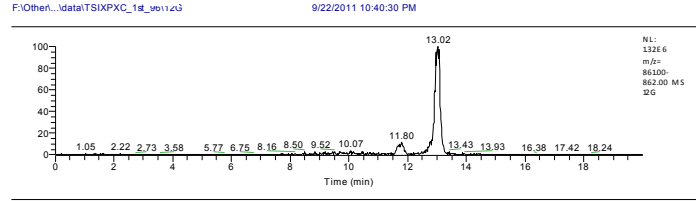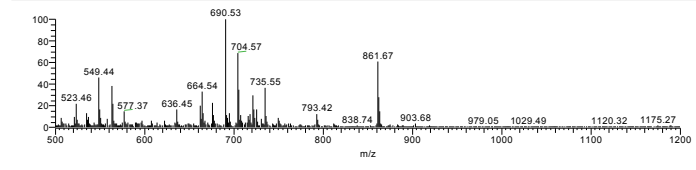

S4C. TSXXPFC

| Sequence   | m/z | Extracted ion chromatogram and mass spectrum at time point                                                                        |
|------------|-----|-----------------------------------------------------------------------------------------------------------------------------------|
| TSKQFC     | 774 | <p>F:\Other...data\TSXXPFC_96_b021111A 9/26/2011 10:14:34 AM</p>                                                                  |
| TSSIPFC    | 718 | <p>F:\Other...data\TSXXPFC_96_b021111E 9/26/2011 12:02:44 PM</p> <p>F:\Other...data\TSXXPFC_96_b021111E 9/26/2011 12:02:44 PM</p> |
| TSLVPFC    | 730 | <p>F:\Other...data\TSXXPFC_96_b021111F 9/26/2011 12:29:48 PM</p>                                                                  |
| +isoprene  | 798 |                                                                                                                                   |
| +2isoprene | 866 |                                                                                                                                   |

|         |     |                                                                                                                                                                                                                                                                                                         |
|---------|-----|---------------------------------------------------------------------------------------------------------------------------------------------------------------------------------------------------------------------------------------------------------------------------------------------------------|
|         |     | <p>F:\Other...data\TSXXPFC_96_buz1111F 9/26/2011 12:29:48 PM</p> 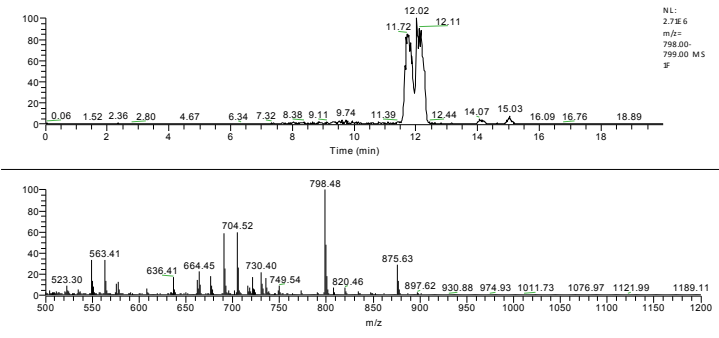 <p>F:\Other...data\TSXXPFC_96_buz1111F 9/26/2011 12:29:48 PM</p>  |
| TSEQPFC | 775 | <p>F:\Other...data\TSXXPFC_96_buz1112E 9/26/2011 3:38:59 PM</p>                                                                                                                                                     |
| TSWNPFC | 818 | <p>F:\Other...data\TSXXPFC_96_buz1112F 9/26/2011 4:06:01 PM</p>                                                                                                                                                     |

TSSSPFC 692  
 +isoprene 760  
 +2isoprene 828

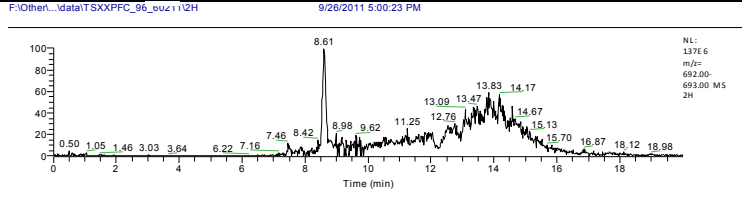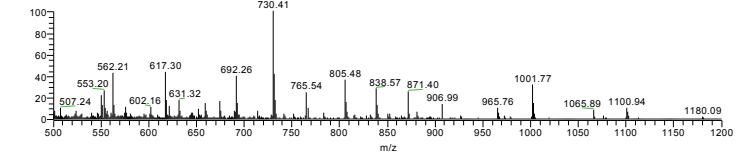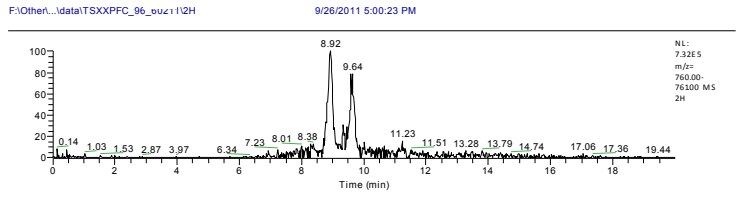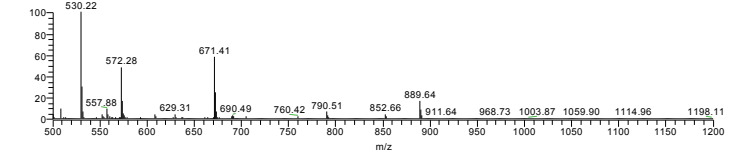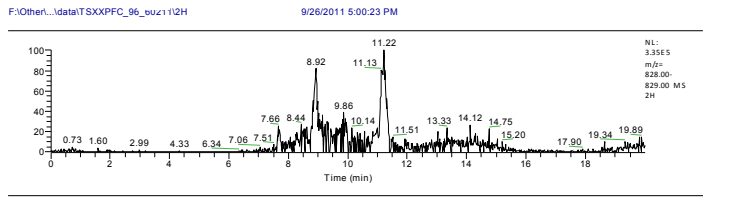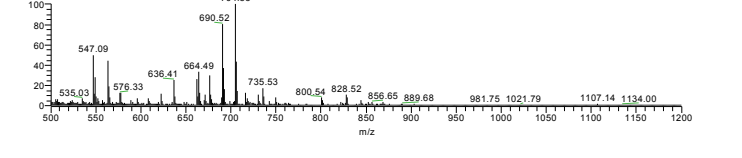

TSAVPFC 688

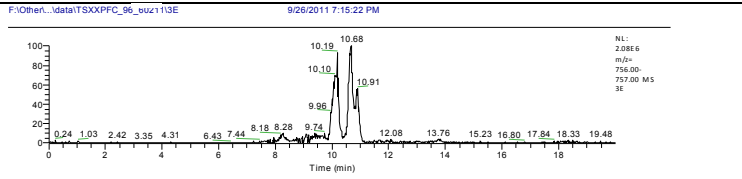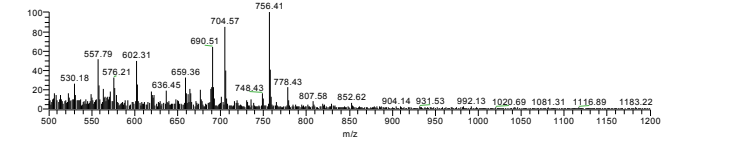

|                                    |            |                                                                                                                                                                                                                                                                                                                                                                                                                                                                                                                                                                                                                                                                                                                                                                                                                                                                                                                                                                                                                                                                                                                                                                                                                                                                                                                                                                                                                                                                                                                                                                                      |
|------------------------------------|------------|--------------------------------------------------------------------------------------------------------------------------------------------------------------------------------------------------------------------------------------------------------------------------------------------------------------------------------------------------------------------------------------------------------------------------------------------------------------------------------------------------------------------------------------------------------------------------------------------------------------------------------------------------------------------------------------------------------------------------------------------------------------------------------------------------------------------------------------------------------------------------------------------------------------------------------------------------------------------------------------------------------------------------------------------------------------------------------------------------------------------------------------------------------------------------------------------------------------------------------------------------------------------------------------------------------------------------------------------------------------------------------------------------------------------------------------------------------------------------------------------------------------------------------------------------------------------------------------|
| TSHGPFC                            | 712        | <p>F:\Other...data\TSXXPFC_96_euz113F 9/26/2011 7:42:24 PM</p> 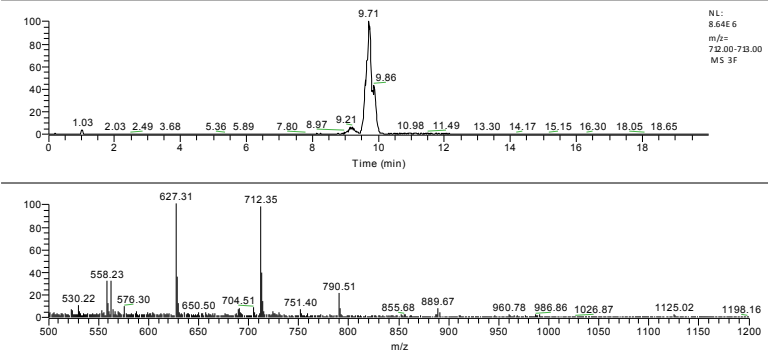 <p>Chromatogram (Time vs. Intensity):</p> <ul style="list-style-type: none"> <li>Peak 1: 9.71 min (Intensity ~100)</li> <li>Peak 2: 9.86 min (Intensity ~80)</li> <li>Other labeled peaks: 1.03, 2.03, 2.49, 3.68, 5.36, 5.89, 7.80, 8.97, 9.21, 10.98, 11.49, 13.30, 14.17, 15.15, 16.30, 18.05, 18.65</li> </ul> <p>Mass Spectrum (m/z vs. Intensity):</p> <ul style="list-style-type: none"> <li>Major peaks: 627.31, 712.35</li> <li>Other labeled peaks: 530.22, 558.23, 576.30, 650.50, 704.51, 751.40, 790.51, 855.68, 889.67, 960.78, 986.86, 1026.87, 1125.02, 1198.16</li> </ul> <p>Metadata: NL: 8.64E 6, m/z: 712.00-718.00, MS 3F</p>                                                                                                                                                                                                                                                                                                                                                                                                                                                                                                                                                                                                                                                                                                                                                                                 |
| TSVDPFC<br>+isoprene<br>+2isoprene | 800<br>868 | <p>F:\Other...data\TSXXPFC_96_euz113G 9/26/2011 8:09:28 PM</p>  <p>Chromatogram (Time vs. Intensity):</p> <ul style="list-style-type: none"> <li>Major peaks: 11.03, 11.08, 11.30</li> <li>Other labeled peaks: 1.00, 2.63, 3.58, 4.97, 6.62, 7.42, 7.85, 8.81, 9.04, 9.12, 9.88, 12.69, 14.14, 14.26, 15.60, 17.78, 18.40</li> </ul> <p>Mass Spectrum (m/z vs. Intensity):</p> <ul style="list-style-type: none"> <li>Major peaks: 704.56, 690.47</li> <li>Other labeled peaks: 508.11, 549.62, 563.41, 577.41, 591.32, 636.36, 664.46, 735.57, 749.61, 800.53, 822.62, 868.55, 889.62, 919.66, 955.71, 1066.68, 1107.17, 1151.17</li> </ul> <p>Metadata: NL: 3.44E 5, m/z: 800.00-80100 MS 3G</p> <p>F:\Other...data\TSXXPFC_96_euz113G 9/26/2011 8:09:28 PM</p>  <p>Chromatogram (Time vs. Intensity):</p> <ul style="list-style-type: none"> <li>Major peaks: 10.81, 10.24, 10.87, 12.08</li> <li>Other labeled peaks: 0.16, 1.05, 2.29, 3.63, 4.38, 5.28, 6.94, 7.65, 8.37, 8.62, 9.98, 12.28, 12.71, 13.48, 15.01, 16.16, 17.11, 19.50</li> </ul> <p>Mass Spectrum (m/z vs. Intensity):</p> <ul style="list-style-type: none"> <li>Major peaks: 704.57, 690.52</li> <li>Other labeled peaks: 548.41, 563.43, 577.41, 636.42, 676.49, 735.57, 749.58, 800.55, 822.56, 868.66, 882.64, 919.68, 978.80, 999.84, 1067.03, 1107.09, 1150.98</li> </ul> <p>Metadata: NL: 3.45E 5, m/z: 868.00-869.00 MS 3G</p> |
| TSRDPFC                            | 789        | <p>F:\Other...data\TSXXPFC_96_euz114A 9/26/2011 9:03:35 PM</p>  <p>Chromatogram (Time vs. Intensity):</p> <ul style="list-style-type: none"> <li>Major peak: 9.26 min (Intensity ~100)</li> <li>Other labeled peaks: 1.02, 1.70, 2.41, 3.70, 5.00, 6.61, 7.63, 8.88, 9.53, 10.34, 12.20, 13.91, 15.66, 16.23, 18.10, 19.48</li> </ul> <p>Mass Spectrum (m/z vs. Intensity):</p> <ul style="list-style-type: none"> <li>Major peaks: 627.34, 789.45</li> <li>Other labeled peaks: 530.23, 562.90, 575.02, 636.32, 724.47, 751.45, 799.54, 855.60, 926.64, 990.76, 1043.87, 1124.99, 1164.64</li> </ul> <p>Metadata: NL: 5.08E 6, m/z: 789.00-790.00 MS 4A</p>                                                                                                                                                                                                                                                                                                                                                                                                                                                                                                                                                                                                                                                                                                                                                                                                                                     |



|         |     |                                                                                                                                                                                                                                                                                                                                                                                                                                                                                                                                                                          |
|---------|-----|--------------------------------------------------------------------------------------------------------------------------------------------------------------------------------------------------------------------------------------------------------------------------------------------------------------------------------------------------------------------------------------------------------------------------------------------------------------------------------------------------------------------------------------------------------------------------|
| TSESPFC | 734 | <p>F:\Other...data\TSXXPFC_96_buz114B 9/26/2011 9:30:37 PM</p> 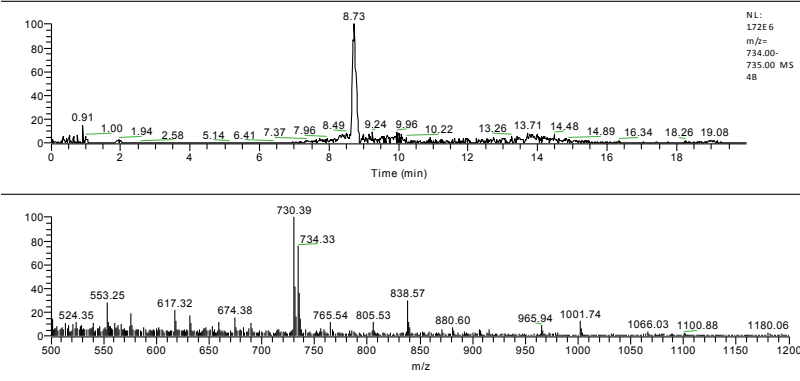 <p>Chromatogram peaks (min): 0.91, 1.00, 1.94, 2.58, 5.14, 6.41, 7.37, 7.96, 8.49, 8.73, 9.24, 9.96, 10.22, 13.26, 13.71, 14.48, 14.89, 16.34, 18.26, 19.08</p> <p>Mass spectrum peaks (m/z): 524.35, 553.25, 617.32, 674.38, 730.39, 734.33, 765.54, 805.53, 838.57, 880.60, 965.94, 1001.74, 1066.03, 1100.88, 1180.06</p> <p>Metadata: NL: 172E6, m/z: 734.00, 735.00 MS, 4B</p>                                    |
| TSMRPFC | 805 | <p>F:\Other...data\TSXXPFC_96_802114D 9/26/2011 10:24:41 PM</p>  <p>Chromatogram peaks (min): 0.26, 0.73, 2.34, 2.79, 4.78, 7.30, 7.71, 7.95, 8.16, 8.59, 9.33, 9.93, 10.50, 11.18, 13.91, 14.29, 16.06, 16.95, 18.55, 19.94</p> <p>Mass spectrum peaks (m/z): 524.25, 553.22, 576.40, 617.31, 631.33, 659.27, 674.41, 751.32, 765.57, 805.47, 838.61, 871.39, 907.05, 965.71, 1019.00, 1065.89, 1100.88, 1111.44, 1180.10</p> <p>Metadata: NL: 9.22E5, m/z: 805.00, 806.00 MS, 4D</p> |
| TSESPFC | 734 | <p>F:\Other...data\TSXXPFC_96_buz114E 9/26/2011 10:51:43 PM</p>  <p>Chromatogram peaks (min): 0.91, 1.03, 1.96, 2.58, 4.71, 5.58, 7.23, 8.16, 8.28, 8.69, 9.84, 10.00, 11.87, 13.26, 13.90, 14.27, 15.41, 17.16, 18.67</p> <p>Mass spectrum peaks (m/z): 513.29, 550.88, 553.26, 558.30, 627.37, 659.29, 689.63, 734.32, 758.46, 760.59, 805.42, 871.43, 926.68, 972.93, 1001.77, 1065.66, 1100.95, 1112.94, 1180.21</p> <p>Metadata: NL: 2.80E6, m/z: 734.00, 735.00 MS, 4E</p>     |
| TSMTPFC | 750 | <p>F:\Other...data\TSXXPFC_96_buz114F 9/26/2011 11:18:47 PM</p>  <p>Chromatogram peaks (min): 1.02, 1.64, 2.29, 3.28, 4.43, 5.86, 7.22, 8.30, 9.05, 9.35, 10.72, 11.27, 13.50, 14.22, 15.06, 16.92, 18.07, 18.65</p> <p>Mass spectrum peaks (m/z): 530.20, 562.86, 627.34, 689.42, 724.42, 750.35, 758.45, 772.32, 834.44, 861.44, 926.69, 976.75, 1025.88, 1100.95, 1165.18</p> <p>Metadata: NL: 102E7, m/z: 750.00, 75100 MS, 4F</p>                                               |

|         |     |                                                                                                                                                                                                                                                                                                       |
|---------|-----|-------------------------------------------------------------------------------------------------------------------------------------------------------------------------------------------------------------------------------------------------------------------------------------------------------|
|         |     | <p>F:\Other...data\TSXXPFC_96_buz114F 9/26/2011 11:18:47 PM</p> 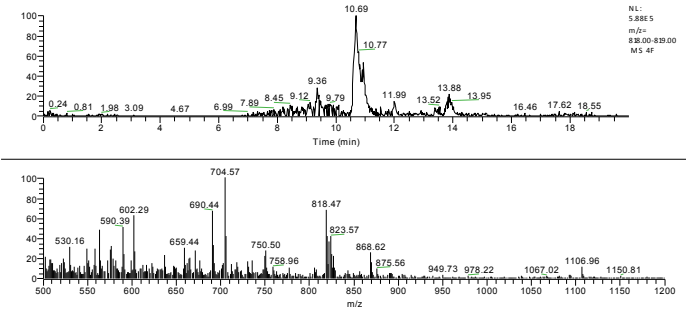 <p>F:\Other...data\TSXXPFC_96_buz114F 9/26/2011 11:18:47 PM</p>  |
| TSTPPFC | 716 | <p>F:\Other...data\TSXXPFC_96_buz114H 9/27/2011 12:12:52 AM</p>                                                                                                                                                    |
| TSNSPFC | 719 | <p>F:\Other...data\TSXXPFC_96_buz114G 9/26/2011 11:45:49 PM</p>                                                                                                                                                   |

|         |     |                                                                                                                                                                                                                                                                                                                                                                                                                                                                                                                           |
|---------|-----|---------------------------------------------------------------------------------------------------------------------------------------------------------------------------------------------------------------------------------------------------------------------------------------------------------------------------------------------------------------------------------------------------------------------------------------------------------------------------------------------------------------------------|
| TSTTPFC | 716 | <p>F:\Other...data\TSXXPFC_96_buz1114H 9/27/2011 12:12:52 AM</p> <p>Chromatogram peaks (min): 1.02, 1.55, 2.43, 2.70, 3.70, 6.07, 6.86, 7.84, 8.35, 8.50, 9.69, 10.26, 11.87, 12.83, 13.69, 13.81, 13.97, 14.26, 14.45, 15.06, 15.48, 16.13, 17.81, 19.07</p> <p>Mass spectrum peaks (m/z): 524.26, 553.22, 562.15, 602.19, 631.28, 674.47, 716.29, 730.39, 765.54, 805.45, 838.54, 871.32, 907.05, 937.85, 965.74, 1001.80, 1018.94, 1065.97, 1102.57, 1188.82</p> <p>Metadata: NL: 134E6, m/z: 786.00-717.00, MS 4H</p> |
| TSLMPFC | 762 | <p>F:\Other...data\TSXXPFC_96_buz1115A 9/27/2011 12:39:54 AM</p> <p>Chromatogram peaks (min): 0.35, 1.93, 2.99, 3.85, 4.74, 6.46, 7.49, 7.87, 9.79, 10.10, 11.85, 12.06, 14.22, 14.72, 15.44, 18.03, 19.73</p> <p>Mass spectrum peaks (m/z): 528.62, 552.30, 557.93, 572.29, 608.35, 671.40, 704.60, 756.68, 762.37, 784.38, 852.63, 889.31, 938.59, 1015.82, 1053.92, 1115.03, 1154.03</p> <p>Metadata: NL: 5.37E6, m/z: 762.00, 763.00 MS, SA</p>                                                                       |
| TSVRPFC | 773 | <p>F:\Other...data\TSXXPFC_96_buz1115E 9/27/2011 2:28:02 AM</p> <p>Chromatogram peaks (min): 0.08, 1.00, 1.50, 2.67, 3.85, 4.78, 6.72, 7.54, 8.08, 8.73, 9.31, 9.43, 9.50, 9.59, 10.02, 11.87, 12.13, 13.18, 14.98, 17.13, 17.97, 19.29, 19.89</p> <p>Mass spectrum peaks (m/z): 530.21, 572.25, 627.31, 671.38, 689.42, 733.49, 751.23, 773.49, 790.48, 838.42, 889.65, 902.85, 967.76, 988.73, 1081.00, 1125.10, 1198.19</p> <p>Metadata: NL: 1.85E6, m/z: 773.00, 774.00 MS, SE</p>                                    |
| TSWSPFC | 791 | <p>F:\Other...data\TSXXPFC_96_buz1115G 9/27/2011 3:22:08 AM</p> <p>Chromatogram peaks (min): 0.31, 0.93, 1.93, 3.32, 4.30, 5.65, 7.58, 8.33, 9.25, 9.67, 10.22, 12.02, 13.95, 14.48, 16.95, 19.03, 19.51</p> <p>Mass spectrum peaks (m/z): 530.20, 558.23, 621.99, 627.31, 636.32, 689.46, 781.43, 791.41, 813.39, 838.57, 889.67, 911.67, 967.76, 988.80, 1101.93, 1139.08, 1198.27</p> <p>Metadata: NL: 9.73E6, m/z: 792.00 MS, SG</p>                                                                                  |

TSVMPFC 748

+isoprene 816

+2isoprene 884

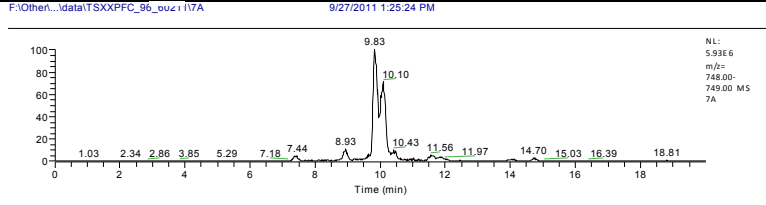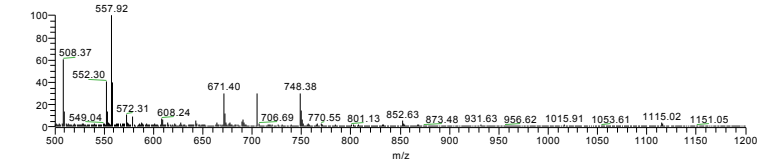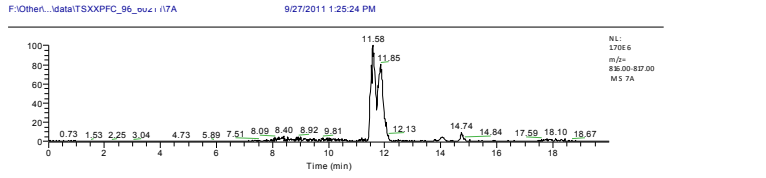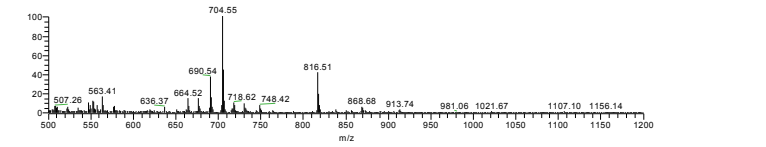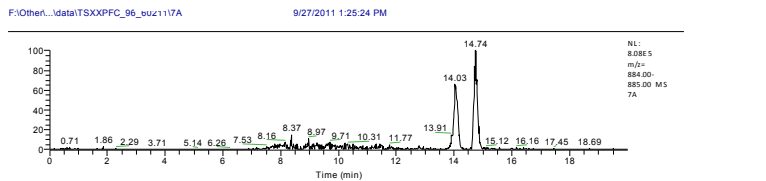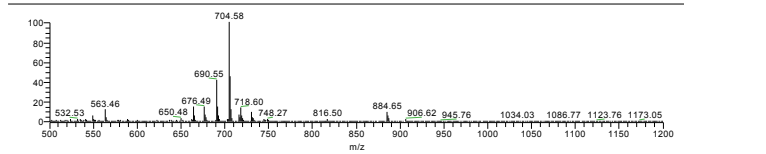

TSTTPFC 720

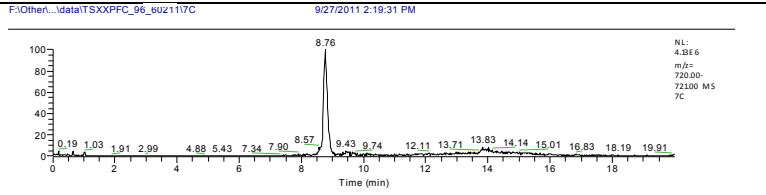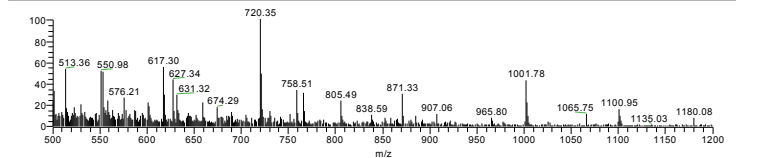

|                                             |                            |                                                                                                                                                                                                                                                                                                                                                                                                                                                                                                                                                                                                                                                                                                                                                                                                                                                                                                                                                                                                                                                                                             |
|---------------------------------------------|----------------------------|---------------------------------------------------------------------------------------------------------------------------------------------------------------------------------------------------------------------------------------------------------------------------------------------------------------------------------------------------------------------------------------------------------------------------------------------------------------------------------------------------------------------------------------------------------------------------------------------------------------------------------------------------------------------------------------------------------------------------------------------------------------------------------------------------------------------------------------------------------------------------------------------------------------------------------------------------------------------------------------------------------------------------------------------------------------------------------------------|
| <p>TSLSPFC</p>                              | <p>718</p>                 | <p>F:\Other...data\TSXXPFC_96_buz117F 9/27/2011 3:40:38 PM</p> 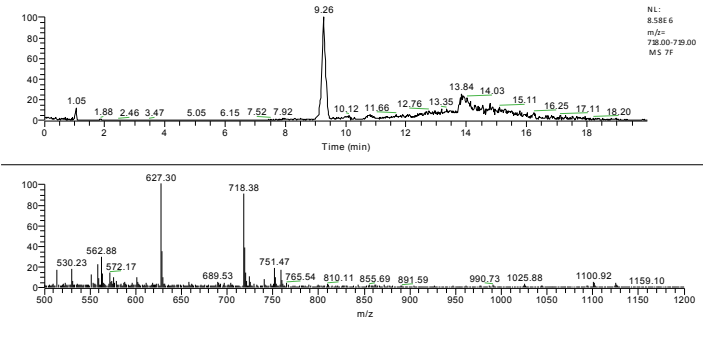 <p>Chromatogram peaks (min): 1.05, 1.88, 2.46, 3.47, 5.05, 6.15, 7.52, 7.92, 9.26, 10.12, 11.66, 12.76, 13.35, 13.84, 14.03, 15.11, 16.25, 17.11, 18.20</p> <p>Mass spectrum peaks (m/z): 530.23, 562.88, 572.17, 627.30, 689.53, 718.38, 751.47, 765.54, 810.11, 855.69, 891.59, 900.73, 1025.88, 1100.92, 1159.10</p> <p>Parameters: NL: 8.58E6, m/z: 738.00-739.00, MS 7F</p>                                                                                                                                                                                                                                                                                                                                                                                                                                                                                                                                                          |
| <p>TSAPPFC<br/>+isoprene</p>                | <p>686<br/>754</p>         | <p>F:\Other...data\TSXXPFC_96_buz117G 9/27/2011 4:07:41 PM</p>  <p>Chromatogram peaks (min): 0.43, 0.97, 2.39, 2.68, 3.59, 6.17, 6.74, 7.32, 8.57, 9.81, 10.00, 11.66, 13.07, 13.23, 15.79, 15.94, 18.79, 18.98</p> <p>Mass spectrum peaks (m/z): 513.30, 551.02, 553.23, 602.15, 631.32, 659.35, 686.29, 724.47, 758.49, 785.53, 871.41, 926.61, 965.76, 1001.81, 1065.93, 1100.93, 1114.13, 1180.26</p> <p>Parameters: NL: 1.08E6, m/z: 686.00-687.00, MS 7G</p> <p>F:\Other...data\TSXXPFC_96_buz117G 9/27/2011 4:07:41 PM</p>  <p>Chromatogram peaks (min): 1.07, 2.31, 2.77, 4.38, 5.65, 7.46, 8.13, 8.25, 9.29, 10.07, 10.31, 12.04, 13.33, 15.34, 15.99, 17.98, 18.53</p> <p>Mass spectrum peaks (m/z): 508.37, 552.31, 557.92, 572.29, 578.00, 627.26, 671.43, 704.53, 754.43, 807.51, 852.65, 889.64, 935.10, 1015.86, 1053.59, 1115.00, 1155.00</p> <p>Parameters: NL: 5.53E6, m/z: 754.00-755.00, MS 7G</p> |
| <p>TSIHPFC<br/>+isoprene<br/>+2isoprene</p> | <p>768<br/>836<br/>904</p> | <p>F:\Other...data\TSXXPFC_96_buz117H 9/27/2011 4:34:43 PM</p>  <p>Chromatogram peaks (min): 0.16, 0.95, 2.27, 3.01, 4.44, 6.44, 7.65, 7.96, 8.92, 9.16, 10.02, 10.15, 11.03, 11.96, 12.61, 14.70, 15.34, 16.11, 18.07, 18.81</p> <p>Mass spectrum peaks (m/z): 530.22, 558.26, 627.33, 636.30, 704.54, 768.43, 807.55, 829.54, 889.65, 932.72, 967.74, 999.68, 1059.92, 1111.95, 1198.10</p> <p>Parameters: NL: 2.42E6, m/z: 768.00-769.00, MS 7H</p>                                                                                                                                                                                                                                                                                                                                                                                                                                                                                                                                                  |

|         |     |                                                                                                                                                                                                                                          |
|---------|-----|------------------------------------------------------------------------------------------------------------------------------------------------------------------------------------------------------------------------------------------|
|         |     | <p>F:\Other...data\TSXXPFC_06_buz117H 9/27/2011 4:34:43 PM</p> <p>NL: 10716<br/>m/z: 836.00<br/>837.00 MS<br/>7H</p> <p>F:\Other...data\TSXXPFC_06_buz117H 9/27/2011 4:34:43 PM</p> <p>NL: 5375<br/>m/z: 954.00<br/>955.00 MS<br/>7H</p> |
| TSRSPFC | 761 | <p>F:\Other...data\TSXXPFC_06_buz118A 9/27/2011 5:01:46 PM</p> <p>NL: 672E5<br/>m/z: 762.00<br/>762.00 MS<br/>8A</p>                                                                                                                     |
| TSDQPC  | 761 | <p>F:\Other...data\TSXXPFC_06_buz118E 9/27/2011 6:49:58 PM</p> <p>NL: 357E6<br/>m/z: 761.00<br/>762.00 MS<br/>8E</p>                                                                                                                     |

TSTNPFC  
+isoprene

733  
801

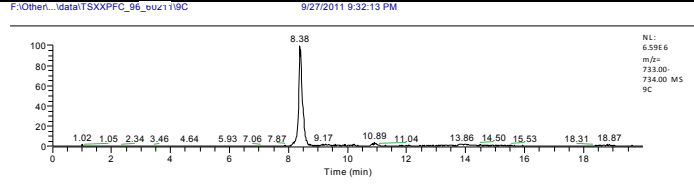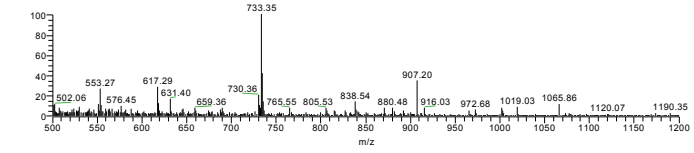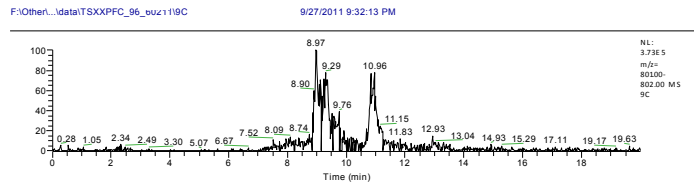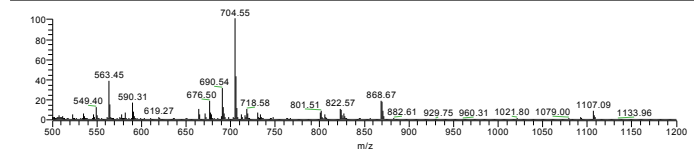

TSRQFC

802

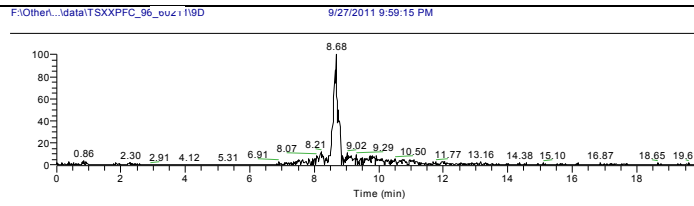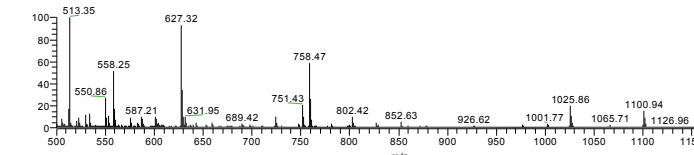

TSRTPFC

775

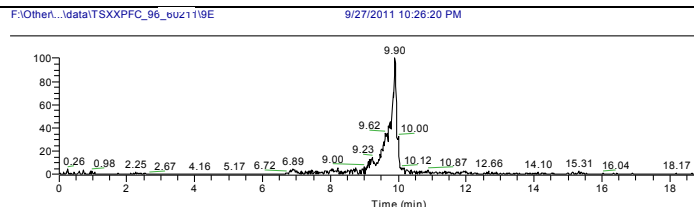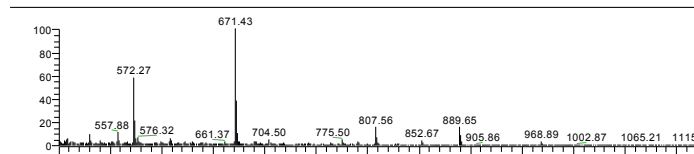

|                      |            |                                                                                                                                                                                                                               |
|----------------------|------------|-------------------------------------------------------------------------------------------------------------------------------------------------------------------------------------------------------------------------------|
| TSHPPFC              | 752        | <p>F:\Other...data\TSXXPFC_96_u02119F 9/27/2011 10:53:22 PM</p> <p>NL: 2.92E6<br/>m/z: 752.00-753.00 MS 9F</p>                                                                                                                |
| TSVPPFC<br>+isoprene | 714<br>782 | <p>F:\Other...data\TSXXPFC_96_u02119G 9/27/2011 11:20:24 PM</p> <p>NL: 6.88E6<br/>m/z: 782.00-783.00 MS 9G</p> <p>F:\Other...data\TSXXPFC_96_u02119G 9/27/2011 11:20:24 PM</p> <p>NL: 2.44E6<br/>m/z: 782.00-783.00 MS 9G</p> |
| TSLNPFC<br>+isoprene | 745<br>813 | <p>F:\Other...data\TSXXPFC_96_u02119H 9/27/2011 11:47:26 PM</p> <p>NL: 3.85E6<br/>m/z: 745.00-746.00 MS 9H</p>                                                                                                                |



|                      |            |                                                                                                                                                                                                                                                                                                                                                                                                                                                                                                                                                                                                                                                                                                                                                                                                                                                                                                                                                                                                                                                                                                                                           |
|----------------------|------------|-------------------------------------------------------------------------------------------------------------------------------------------------------------------------------------------------------------------------------------------------------------------------------------------------------------------------------------------------------------------------------------------------------------------------------------------------------------------------------------------------------------------------------------------------------------------------------------------------------------------------------------------------------------------------------------------------------------------------------------------------------------------------------------------------------------------------------------------------------------------------------------------------------------------------------------------------------------------------------------------------------------------------------------------------------------------------------------------------------------------------------------------|
|                      |            | <p>F:\Other...data\TSPXPFC_96_buz1109H 9/27/2011 11:47:26 PM</p> 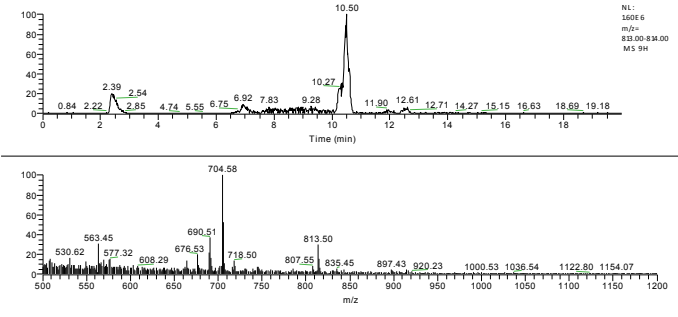 <p>Chromatogram peaks (min): 0.84, 2.22, 2.39, 2.54, 4.74, 5.55, 6.75, 6.92, 7.83, 8.25, 10.27, 10.50, 11.50, 12.61, 12.71, 14.27, 15.15, 16.63, 18.69, 19.18</p> <p>Mass spectrum peaks (m/z): 530.62, 563.45, 577.32, 608.29, 676.53, 690.51, 704.58, 718.50, 807.55, 813.50, 835.45, 897.43, 920.23, 1000.53, 1038.54, 1122.80, 1154.07</p> <p>Parameters: NL: 1505.6, m/z: 833.00-834.00, MS 3H</p>                                                                                                                                                                                                                                                                                                                                                                                                                                                                                                                                                                               |
| TSEKPC               | 775        | <p>F:\Other...data\TSPXPFC_96_buz1110A 9/28/2011 12:14:30 AM</p>  <p>Chromatogram peaks (min): 0.93, 2.32, 3.34, 4.18, 5.11, 6.96, 7.20, 8.21, 8.56, 8.90, 9.83, 10.53, 11.97, 13.98, 14.69, 16.16, 18.10, 18.77</p> <p>Mass spectrum peaks (m/z): 513.33, 550.89, 576.26, 627.25, 659.28, 689.36, 724.62, 758.47, 775.39, 805.40, 871.14, 907.27, 965.76, 1001.78, 1065.80, 1100.93, 1112.99, 1180.18</p> <p>Parameters: NL: 4.096.6, m/z: 775.00-776.00, MS 3A</p>                                                                                                                                                                                                                                                                                                                                                                                                                                                                                                                                                                                    |
| TSTSPFC<br>+isoprene | 706<br>774 | <p>F:\Other...data\TSPXPFC_96_buz1110E 9/28/2011 2:02:39 AM</p>  <p>Chromatogram peaks (min): 0.04, 1.05, 2.29, 2.61, 4.88, 6.41, 7.20, 7.53, 7.87, 8.59, 8.84, 9.92, 11.66, 12.99, 13.35, 13.81, 14.17, 14.55, 15.13, 15.99, 16.18, 17.19, 18.34</p> <p>Mass spectrum peaks (m/z): 513.58, 550.80, 553.20, 627.33, 659.30, 706.27, 751.45, 758.45, 761.48, 852.68, 926.77, 965.79, 1025.84, 1065.57, 1100.95, 1126.89, 1180.50</p> <p>Parameters: NL: 2256.6, m/z: 706.00-707.00, MS 3E</p> <p>F:\Other...data\TSPXPFC_96_buz1110E 9/28/2011 2:02:39 AM</p>  <p>Chromatogram peaks (min): 0.23, 0.66, 2.32, 2.39, 5.64, 6.63, 7.32, 7.95, 8.00, 9.82, 9.81, 9.86, 10.19, 11.65, 11.94, 13.16, 13.47, 16.15, 16.88, 18.34, 18.67</p> <p>Mass spectrum peaks (m/z): 552.29, 557.91, 576.27, 619.26, 671.41, 704.56, 718.50, 774.41, 807.55, 829.53, 867.66, 930.88, 980.83, 1024.17, 1114.98, 1145.94</p> <p>Parameters: NL: 5.88E.5, m/z: 774.00-775.00, MS 3D</p> |

|                      |            |                                                                                                                                                |
|----------------------|------------|------------------------------------------------------------------------------------------------------------------------------------------------|
|                      |            | <p>F:\Other...data\TSSXPFC_96_buz1110E 9/28/2011 2:02:39 AM</p> <p>Chromatogram Peak: 11.66 min</p> <p>Mass Spectrum Base Peak: 704.55 m/z</p> |
| TSSSPFC              | 692        | <p>F:\Other...data\TSSXPFC_96_buz1110G 9/28/2011 2:56:45 AM</p> <p>Chromatogram Peak: 8.61 min</p> <p>Mass Spectrum Base Peak: 730.39 m/z</p>  |
| TSDGPFC              | 690        | <p>F:\Other...data\TSSXPFC_96_buz1110H 9/28/2011 3:23:45 AM</p> <p>Chromatogram Peak: 13.95 min</p> <p>Mass Spectrum Base Peak: 704.54 m/z</p> |
| TSASPFC<br>+isoprene | 676<br>744 | <p>F:\Other...data\TSSXPFC_96_buz1111B 9/28/2011 4:17:52 AM</p> <p>Chromatogram Peak: 8.73 min</p> <p>Mass Spectrum Base Peak: 676.21 m/z</p>  |

|            |     |                                                                 |
|------------|-----|-----------------------------------------------------------------|
|            |     | <p>F:\Other...data\TSXXPFC_96_buz1111B 9/28/2011 4:17:52 AM</p> |
| TSKVPFC    | 745 | <p>F:\Other...data\TSXXPFC_96_buz1111C 9/28/2011 4:44:54 AM</p> |
| TSRFPFC    | 821 | <p>F:\Other...data\TSXXPFC_96_buz1111G 9/28/2011 6:33:06 AM</p> |
| TSVWPFC    | 803 | <p>F:\Other...data\TSXXPFC_96_buz1111H 9/28/2011 7:00:08 AM</p> |
| +isoprene  | 871 |                                                                 |
| +2isoprene | 939 |                                                                 |

|                                            |                            |                                                                                                                                                                                                                                                                                                         |
|--------------------------------------------|----------------------------|---------------------------------------------------------------------------------------------------------------------------------------------------------------------------------------------------------------------------------------------------------------------------------------------------------|
|                                            |                            | <p>F:\Other_data\TSXXPFC_96_buz11111H 9/28/2011 7:00:08 AM</p> 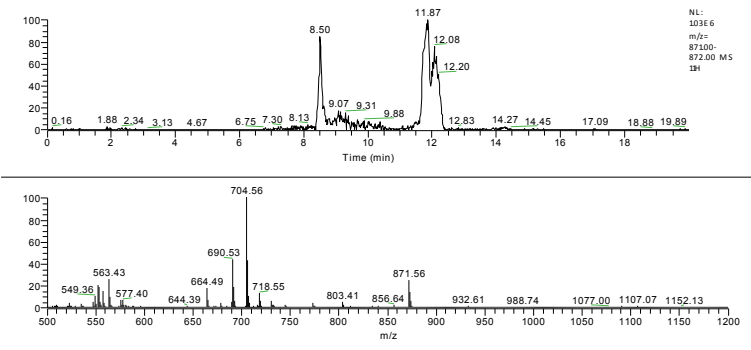 <p>F:\Other_data\TSXXPFC_96_buz11111H 9/28/2011 7:00:08 AM</p>      |
| <p>TSISPC<br/>+isoprene<br/>+2isoprene</p> | <p>718<br/>786<br/>854</p> | <p>F:\Other_data\TSXXPFC_96_buz11112C 9/28/2011 8:21:15 AM</p>  <p>F:\Other_data\TSXXPFC_96_buz11112C 9/28/2011 8:21:15 AM</p>  |

|                                            |                            |                                                                                                                                                                                                                                                                                                                                                                                                                                                                                                                                                                                                                                                                                                                           |
|--------------------------------------------|----------------------------|---------------------------------------------------------------------------------------------------------------------------------------------------------------------------------------------------------------------------------------------------------------------------------------------------------------------------------------------------------------------------------------------------------------------------------------------------------------------------------------------------------------------------------------------------------------------------------------------------------------------------------------------------------------------------------------------------------------------------|
|                                            |                            | <p>F:\Other...data\TSXXPFC_96_buz1112C 9/28/2011 8:21:15 AM</p> 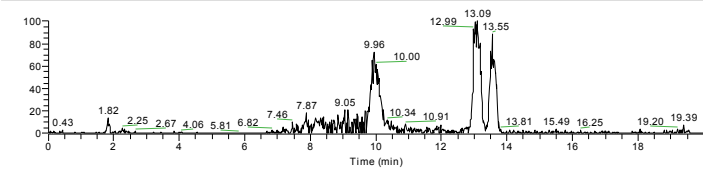                                                                                                                                                                                                                                                                                                                                                                                                                                                                                      |
| <p>TSVQFC<br/>+isoprene<br/>+2isoprene</p> | <p>745<br/>813<br/>881</p> | <p>F:\Other...data\TSXXPFC_96_buz1112D 9/28/2011 8:48:19 AM</p>   <p>F:\Other...data\TSXXPFC_96_buz1112D 9/28/2011 8:48:19 AM</p>   <p>F:\Other...data\TSXXPFC_96_buz1112D 9/28/2011 8:48:19 AM</p>   |

|                              |                    |                                                                                                                                                                                                                                                                                                                                                                                                                                                                                                                                     |
|------------------------------|--------------------|-------------------------------------------------------------------------------------------------------------------------------------------------------------------------------------------------------------------------------------------------------------------------------------------------------------------------------------------------------------------------------------------------------------------------------------------------------------------------------------------------------------------------------------|
| <p>TSIQPFC<br/>+isoprene</p> | <p>827<br/>895</p> | <p>F:\Other_data\TSXXPFC_96_60z1\112F 9/28/2011 9:42:23 AM</p> 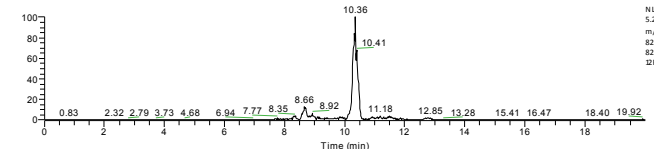 <p>Time (min)</p>  <p>m/z</p> <p>F:\Other_data\TSXXPFC_96_60z1\112F 9/28/2011 9:42:23 AM</p>  <p>Time (min)</p>  <p>m/z</p> |
| <p>TSETPFC</p>               | <p>748</p>         | <p>F:\Other_data\TSXXPFC_96_60z1\112H 9/28/2011 10:36:28 AM</p>  <p>Time (min)</p>  <p>m/z</p>                                                                                                                                                                                                                                                              |
| <p>TSGSPFC</p>               | <p>662</p>         | <p>F:\Other_data\TSXXPFC_96_60b1\111A 9/29/2011 10:19:31 AM</p>  <p>Time (min)</p>  <p>m/z</p>                                                                                                                                                                                                                                                              |

|                      |            |                                                                                                                                                                                                                                                                                                                                                                                                                                                                                                                                                                                                                                             |
|----------------------|------------|---------------------------------------------------------------------------------------------------------------------------------------------------------------------------------------------------------------------------------------------------------------------------------------------------------------------------------------------------------------------------------------------------------------------------------------------------------------------------------------------------------------------------------------------------------------------------------------------------------------------------------------------|
| TSRVPCF              | 773        | <p>F:\Other...data\TSXXPCF_96_006111B 9/29/2011 10:46:33 AM</p> 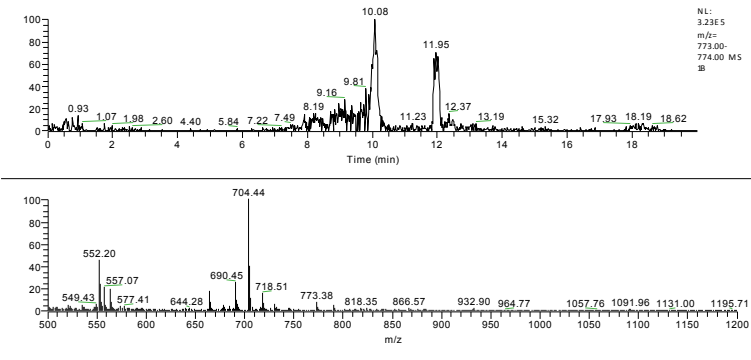 <p>Chromatogram (Time (min) vs. Intensity) showing peaks at 10.08 and 11.95. Mass spectrum (m/z vs. Intensity) showing peaks at 552.20, 704.44, and 718.51.</p>                                                                                                                                                                                                                                                                                                                          |
| TSSLPCF<br>+isoprene | 718<br>786 | <p>F:\Other...data\TSXXPCF_96_006111D 9/29/2011 11:40:39 AM</p>  <p>Chromatogram (Time (min) vs. Intensity) showing peaks at 9.52, 13.78, and 13.88. Mass spectrum (m/z vs. Intensity) showing peaks at 572.28, 718.30, and 790.39.</p> <p>F:\Other...data\TSXXPCF_96_006111D 9/29/2011 11:40:39 AM</p>  <p>Chromatogram (Time (min) vs. Intensity) showing a major peak at 10.70. Mass spectrum (m/z vs. Intensity) showing peaks at 704.53, 786.39, and 822.51.</p> |
| TSQAPCF              | 717        | <p>F:\Other...data\TSXXPCF_96_006111H 9/29/2011 1:28:53 PM</p>  <p>Chromatogram (Time (min) vs. Intensity) showing a major peak at 8.59. Mass spectrum (m/z vs. Intensity) showing peaks at 652.38, 717.31, and 753.07.</p>                                                                                                                                                                                                                                                                                                                             |

|                                                   |                                  |                                                                                                                                                                                                                                                                                                                                                                                                                                                                                                                                                                                                                                                                                                                                                                                                                                                                                                                                                                                                                                                                                                                                                                                                                                                                                                                                                                                                                                                                                                                                                                                                                                                                                                                     |
|---------------------------------------------------|----------------------------------|---------------------------------------------------------------------------------------------------------------------------------------------------------------------------------------------------------------------------------------------------------------------------------------------------------------------------------------------------------------------------------------------------------------------------------------------------------------------------------------------------------------------------------------------------------------------------------------------------------------------------------------------------------------------------------------------------------------------------------------------------------------------------------------------------------------------------------------------------------------------------------------------------------------------------------------------------------------------------------------------------------------------------------------------------------------------------------------------------------------------------------------------------------------------------------------------------------------------------------------------------------------------------------------------------------------------------------------------------------------------------------------------------------------------------------------------------------------------------------------------------------------------------------------------------------------------------------------------------------------------------------------------------------------------------------------------------------------------|
| <p>TSTSPFC</p> <p>+isoprene</p> <p>+2isoprene</p> | <p>706</p> <p>774</p> <p>842</p> | <p>F:\Other...data\TSTSPFC_96_6061102A 9/29/2011 1:55:53 PM</p> 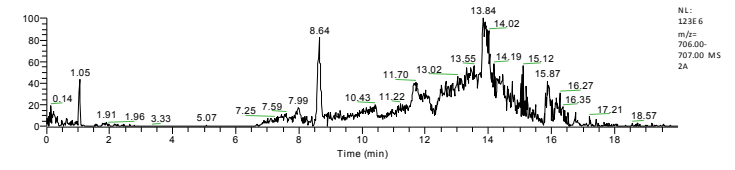 <p>Chromatogram showing peaks at 8.64, 13.84, 14.02, 14.19, 15.12, 15.87, 16.27, 16.35, 17.21, 18.57. NL: 12366, m/z: 706.00-707.00 MS 2A.</p>  <p>Mass spectrum showing major peak at 550.95. Other peaks at 530.14, 553.25, 627.32, 659.33, 698.26, 706.25, 724.36, 758.49, 764.25, 852.59, 877.53, 926.59, 966.66, 1001.75, 1066.23, 1100.95, 1122.97, 1180.01.</p> <p>F:\Other...data\TSTSPFC_96_6061102A 9/29/2011 1:55:53 PM</p>  <p>Chromatogram showing peaks at 9.86, 9.91, 11.63, 11.99, 13.43, 14.03, 15.85, 16.15, 18.57. NL: 23765, m/z: 774.00-775.00 MS 2A.</p>  <p>Mass spectrum showing major peak at 704.53. Other peaks at 549.35, 552.20, 577.46, 664.43, 690.51, 718.54, 774.44, 801.28, 842.50, 864.53, 903.66, 927.75, 1014.71, 1062.89, 1107.06, 1186.15.</p> <p>F:\Other...data\TSTSPFC_96_6061102A 9/29/2011 1:55:53 PM</p>  <p>Chromatogram showing major peak at 11.66. NL: 12916, m/z: 842.00-843.00 MS 2A.</p>  <p>Mass spectrum showing major peak at 704.53. Other peaks at 553.41, 577.57, 690.49, 674.36, 718.48, 774.44, 826.89, 842.46, 864.56, 889.38, 933.92, 1015.27, 1121.65, 1151.92.</p> |
| <p>TSTFPFC</p> <p>+isoprene</p> <p>+2isoprene</p> | <p>766</p> <p>834</p> <p>902</p> | <p>F:\Other...data\TSTFPFC_96_6061102G 9/29/2011 4:38:10 PM</p>  <p>Chromatogram showing peaks at 9.64, 10.00, 10.20, 11.32, 13.74, 14.88, 16.75, 17.66, 19.46. NL: 102E6, m/z: 766.00-767.00 MS 2G.</p>  <p>Mass spectrum showing major peak at 627.32. Other peaks at 513.38, 562.85, 587.22, 632.00, 704.54, 758.46, 768.38, 810.09, 855.61, 877.55, 926.69, 990.73, 1025.86, 1100.93, 1165.10.</p>                                                                                                                                                                                                                                                                                                                                                                                                                                                                                                                                                                                                                                                                                                                                                                                                                                                                                                                                                                                                                                                                                                                                      |



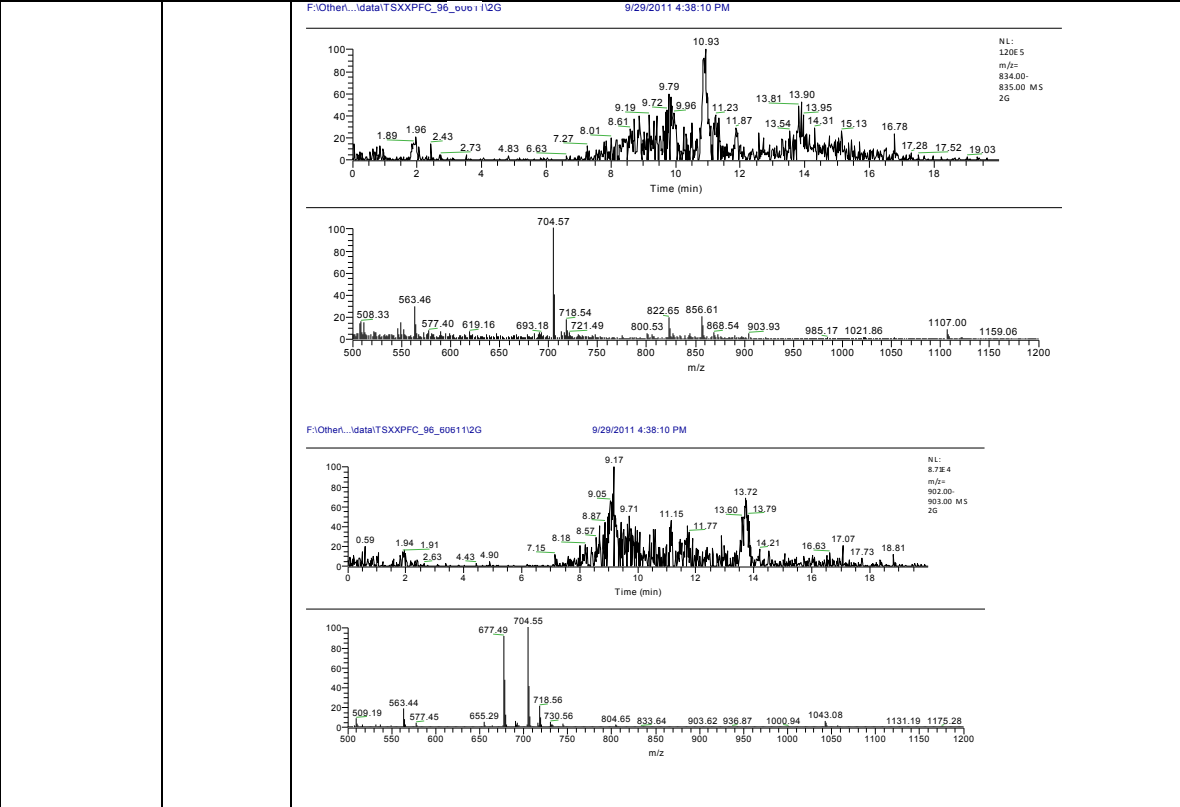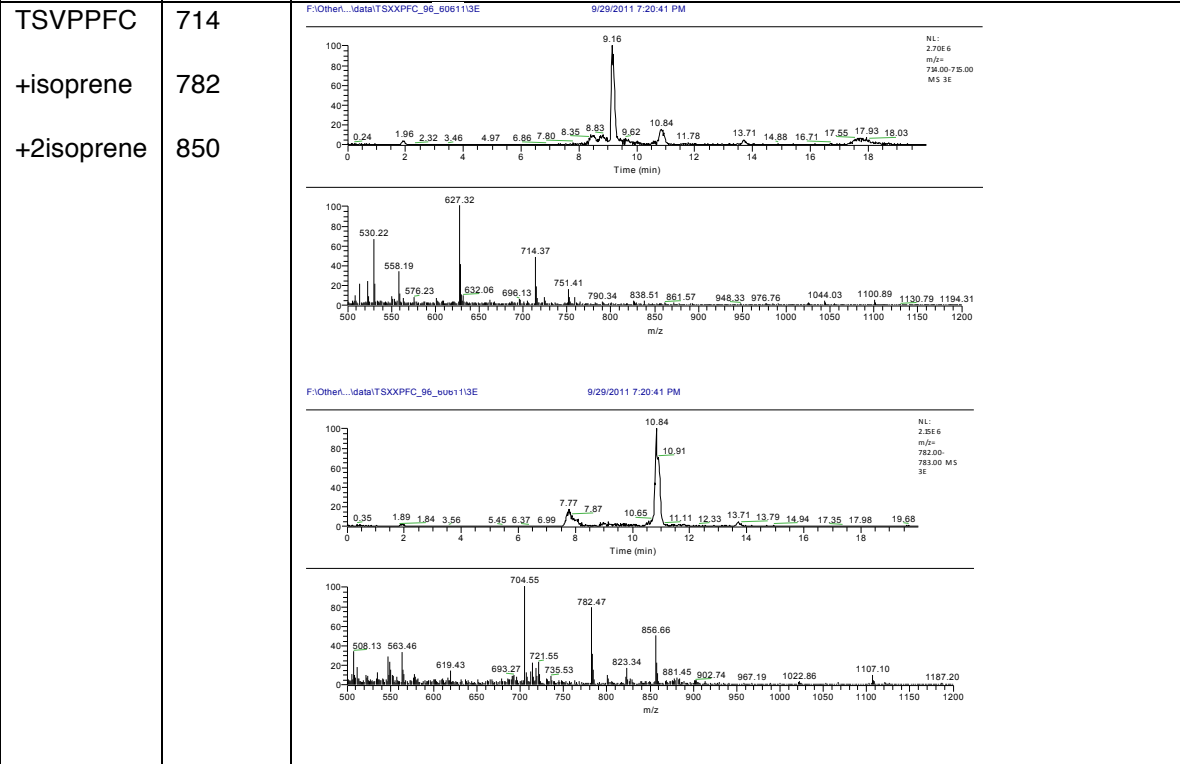

|         |     |                                                                                                                                                                                                                                                                                                                                                                                                                                                                                                                                                                                                                                                                                                                                                                                                                                                                                                                                                                                                                                                                                                     |
|---------|-----|-----------------------------------------------------------------------------------------------------------------------------------------------------------------------------------------------------------------------------------------------------------------------------------------------------------------------------------------------------------------------------------------------------------------------------------------------------------------------------------------------------------------------------------------------------------------------------------------------------------------------------------------------------------------------------------------------------------------------------------------------------------------------------------------------------------------------------------------------------------------------------------------------------------------------------------------------------------------------------------------------------------------------------------------------------------------------------------------------------|
|         |     | <p>F:\Other...data\TSXXPFC_96_sub113E 9/29/2011 7:20:41 PM</p> 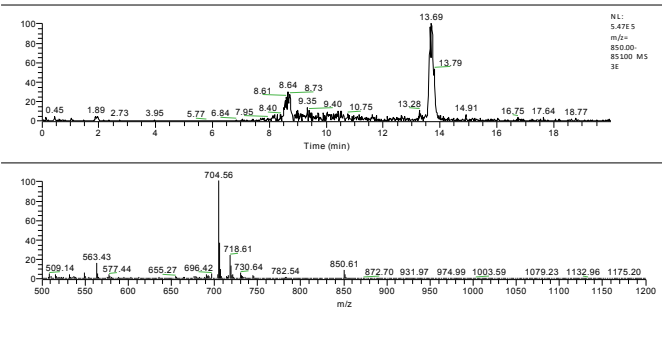 <p>Chromatogram peaks (min): 0.45, 1.89, 2.73, 3.95, 5.77, 6.84, 7.95, 8.40, 8.61, 8.64, 8.73, 9.35, 9.40, 10.75, 13.28, 13.69, 14.91, 16.75, 17.64, 18.77</p> <p>Mass spectrum peaks (m/z): 509.14, 563.43, 577.44, 655.27, 696.42, 704.56, 715.61, 730.64, 782.54, 850.61, 872.70, 931.97, 974.99, 1003.59, 1079.23, 1132.96, 1175.20</p> <p>Parameters: NL: 5.47E5, m/z: 850.00, 85.00 MS, 3E</p>                                                                                                                                                                                                                                                                                                                                                                                                                                                                                                                                              |
| TSQEPFC | 775 | <p>F:\Other...data\TSXXPFC_96_sub114A 9/29/2011 9:08:49 PM</p>  <p>Chromatogram peaks (min): 0.76, 1.91, 1.81, 3.63, 4.06, 5.84, 7.28, 7.35, 8.44, 9.07, 9.19, 9.93, 11.94, 12.01, 14.09, 14.22, 16.33, 17.90, 18.52</p> <p>Mass spectrum peaks (m/z): 540.41, 553.33, 562.16, 605.11, 654.54, 659.31, 684.36, 730.41, 775.31, 805.47, 838.54, 852.51, 882.67, 939.77, 965.70, 995.83, 1072.16, 1079.99, 1102.42, 1153.23</p> <p>Parameters: NL: 5.90E5, m/z: 775.00, 776.00 MS, 4A</p>                                                                                                                                                                                                                                                                                                                                                                                                                                                                                                                           |
| TSFSPFC | 752 | <p>F:\Other...data\TSXXPFC_96_sub114B 9/29/2011 9:35:53 PM</p>  <p>Chromatogram peaks (min): 1.03, 2.63, 4.19, 5.62, 6.60, 7.70, 8.31, 8.44, 9.47, 9.79, 11.01, 11.61, 13.02, 13.69, 14.60, 15.85, 17.88, 18.65</p> <p>Mass spectrum peaks (m/z): 513.35, 551.10, 572.21, 631.28, 659.29, 704.55, 752.39, 758.49, 774.41, 827.49, 877.39, 926.76, 976.87, 1001.82, 1044.07, 1100.92, 1144.13, 1185.23</p> <p>Parameters: NL: 2.30E6, m/z: 752.00, 753.00 MS, 4B</p> <p>F:\Other...data\TSXXPFC_96_sub114B 9/29/2011 9:35:53 PM</p>  <p>Chromatogram peaks (min): 1.07, 1.89, 2.34, 4.31, 4.91, 5.70, 7.15, 7.90, 8.81, 9.26, 9.93, 10.99, 12.08, 13.35, 14.33, 15.30, 17.50, 18.40</p> <p>Mass spectrum peaks (m/z): 547.10, 552.26, 557.19, 590.23, 619.34, 684.28, 704.58, 752.34, 801.58, 820.47, 821.54, 856.63, 882.88, 988.82, 1021.74, 1107.12, 1176.76</p> <p>Parameters: NL: 2.34E6, m/z: 820.00, 821.00 MS, 4B</p> |

|                              |                    |                                                                                                                                                                                                                                                                                                                                                                                                                                                                                                                                                                                                                                                                                                                                                                                                                                                                                                                                                 |
|------------------------------|--------------------|-------------------------------------------------------------------------------------------------------------------------------------------------------------------------------------------------------------------------------------------------------------------------------------------------------------------------------------------------------------------------------------------------------------------------------------------------------------------------------------------------------------------------------------------------------------------------------------------------------------------------------------------------------------------------------------------------------------------------------------------------------------------------------------------------------------------------------------------------------------------------------------------------------------------------------------------------|
| <p>TSQAPFC</p>               | <p>717</p>         | <p>F:\Other...data\TSXXPFC_96_00e114C 9/29/2011 10:02:55 PM</p> <p>Chromatogram (Time (min)) peaks: 0.40, 1.58, 2.29, 2.37, 4.59, 5.29, 7.03, 7.94, 8.38, 8.57, 9.77, 10.12, 11.82, 13.81, 13.91, 14.70, 16.78, 17.11, 18.36</p> <p>Mass Spectrum (m/z) peaks: 540.23, 562.14, 617.33, 674.37, 717.33, 730.41, 739.39, 805.48, 838.55, 890.69, 907.07, 965.83, 1001.78, 1065.84, 1121.48, 1159.33</p> <p>Metadata: NL: 9.66E5, m/z: 717.00, MS: 4C</p>                                                                                                                                                                                                                                                                                                                                                                                                                                                                                          |
| <p>TSTTPFC</p>               | <p>720</p>         | <p>F:\Other...data\TSXXPFC_96_00e114F 9/29/2011 11:24:04 PM</p> <p>Chromatogram (Time (min)) peaks: 1.05, 2.27, 3.03, 4.02, 4.69, 7.10, 8.18, 8.57, 8.74, 8.95, 9.50, 12.80, 13.79, 13.91, 14.32, 15.10, 16.76, 18.02, 19.56</p> <p>Mass Spectrum (m/z) peaks: 513.08, 550.94, 553.27, 562.12, 617.27, 631.41, 659.41, 720.30, 758.50, 765.59, 805.48, 838.58, 871.33, 907.10, 965.82, 1001.84, 1065.90, 1100.99, 1173.02, 1180.31</p> <p>Metadata: NL: 1.87E6, m/z: 720.00, MS: 4F</p>                                                                                                                                                                                                                                                                                                                                                                                                                                                         |
| <p>TSFLPFC<br/>+isoprene</p> | <p>778<br/>846</p> | <p>F:\Other...data\TSXXPFC_96_00e114G 9/29/2011 11:51:06 PM</p> <p>Chromatogram (Time (min)) peaks: 1.03, 1.96, 2.85, 3.25, 4.57, 5.05, 7.22, 7.80, 9.12, 9.81, 10.36, 10.77, 11.04, 12.62, 13.98, 14.10, 16.56, 18.31, 18.69</p> <p>Mass Spectrum (m/z) peaks: 508.00, 553.48, 577.43, 619.23, 692.54, 704.56, 718.58, 749.72, 778.43, 822.48, 856.63, 867.57, 903.63, 945.08, 1021.77, 1067.58, 1107.10, 1158.16</p> <p>Metadata: NL: 8.59E5, m/z: 778.00, MS: 4G</p> <p>F:\Other...data\TSXXPFC_96_00e114G 9/29/2011 11:51:06 PM</p> <p>Chromatogram (Time (min)) peaks: 1.03, 1.96, 2.44, 4.42, 4.85, 6.44, 7.80, 8.47, 9.17, 9.91, 10.92, 12.00, 12.68, 13.14, 15.10, 16.68, 17.16, 18.12, 19.17</p> <p>Mass Spectrum (m/z) peaks: 511.19, 563.42, 577.46, 636.44, 692.52, 704.57, 718.61, 778.46, 807.46, 846.56, 875.66, 903.66, 936.69, 964.94, 1023.84, 1082.17, 1121.11, 1173.28</p> <p>Metadata: NL: 2.46E6, m/z: 846.00, MS: 4G</p> |

|                                                   |                                  |                                                                                                                                                                                                                                                                                                                                                                                                                                                                                                                                                                                                                                                                                                                                                                                                                                                                                 |
|---------------------------------------------------|----------------------------------|---------------------------------------------------------------------------------------------------------------------------------------------------------------------------------------------------------------------------------------------------------------------------------------------------------------------------------------------------------------------------------------------------------------------------------------------------------------------------------------------------------------------------------------------------------------------------------------------------------------------------------------------------------------------------------------------------------------------------------------------------------------------------------------------------------------------------------------------------------------------------------|
| <p>TSMYPFC</p> <p>+isoprene</p> <p>+2isoprene</p> | <p>812</p> <p>880</p> <p>948</p> | <p>F:\Other...data\TSMYPFC_96_bu06114H 9/30/2011 12:18:06 AM</p> 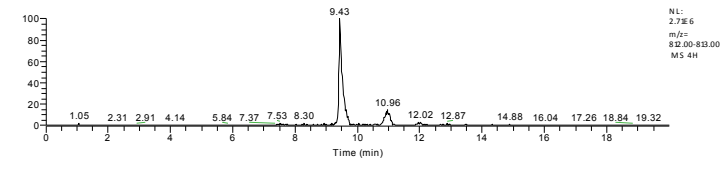 <p>NL: 2.7E6<br/>m/z: 812.00-813.00<br/>MS 4H</p>  <p>F:\Other...data\TSMYPFC_96_bu06114H 9/30/2011 12:18:06 AM</p>  <p>NL: 1.95E6<br/>m/z: 880.00-88100 MS<br/>4H</p>  <p>F:\Other...data\TSMYPFC_96_bu06114H 9/30/2011 12:18:06 AM</p>  <p>NL: 1.07E5<br/>m/z: 948.00-949.00 MS<br/>4H</p>  |
| <p>TSNVPFC</p>                                    | <p>731</p>                       | <p>F:\Other...data\TSNVPFC_96_bu061115A 9/30/2011 12:45:10 AM</p>  <p>NL: 8.33E5<br/>m/z: 731.00-732.00 MS<br/>5A</p>                                                                                                                                                                                                                                                                                                                                                                                                                                                                                                                                                                                   |

|                                                   |                                  |                                                                                                                                                                                                                                                                                                                                                                                                                                                                                                                                                                                                                                                                                                                      |
|---------------------------------------------------|----------------------------------|----------------------------------------------------------------------------------------------------------------------------------------------------------------------------------------------------------------------------------------------------------------------------------------------------------------------------------------------------------------------------------------------------------------------------------------------------------------------------------------------------------------------------------------------------------------------------------------------------------------------------------------------------------------------------------------------------------------------|
| <p>TSVTPFC</p> <p>+isoprene</p> <p>+2isoprene</p> | <p>718</p> <p>786</p> <p>854</p> | <p>F:\Other...data\TSXXPFC_96_bu6111SE 9/30/2011 2:33:19 AM</p> 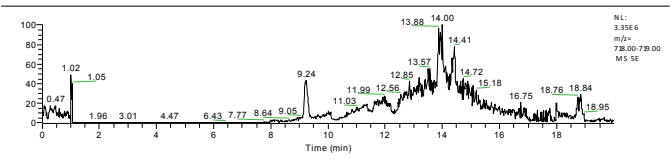  <p>F:\Other...data\TSXXPFC_96_bu6111SE 9/30/2011 2:33:19 AM</p>   <p>F:\Other...data\TSXXPFC_96_bu6111SE 9/30/2011 2:33:19 AM</p>   |
| <p>TSFVPFC</p> <p>+isoprene</p>                   | <p>832</p>                       | <p>F:\Other...data\TSXXPFC_96_bu6111SF 9/30/2011 3:00:21 AM</p>                                                                                                                                                                                                                                                                                                                                                                                                                                                                              |

TSIIPFC  
 +isoprene  
 +2isoprene

744  
 812  
 880

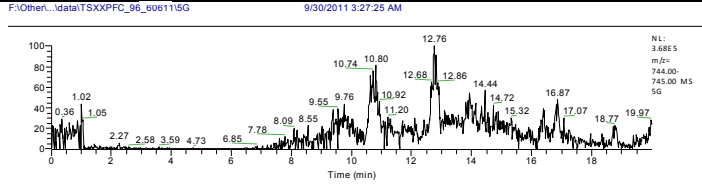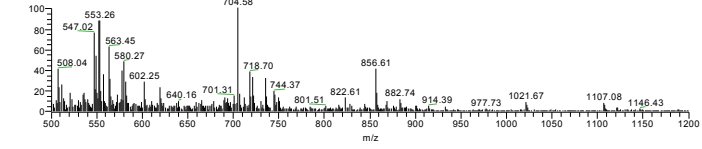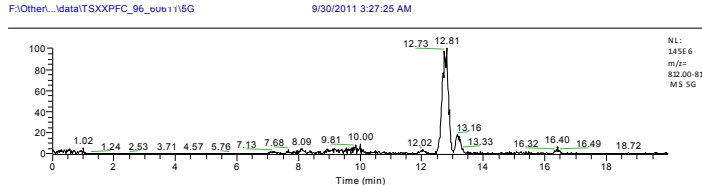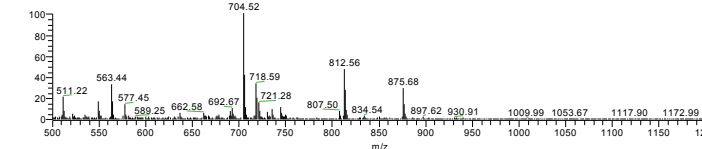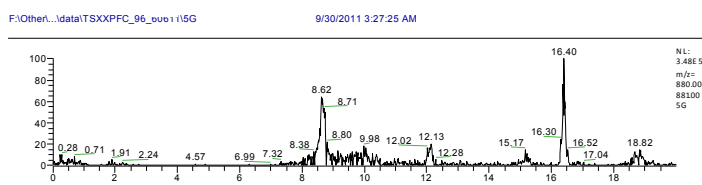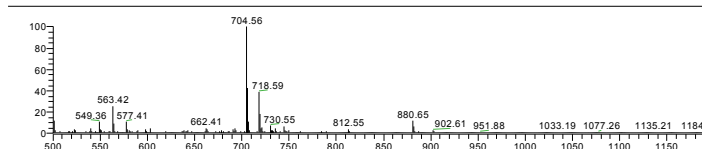

TSAEPFC  
 +isoprene  
 +2isoprene

786  
 854

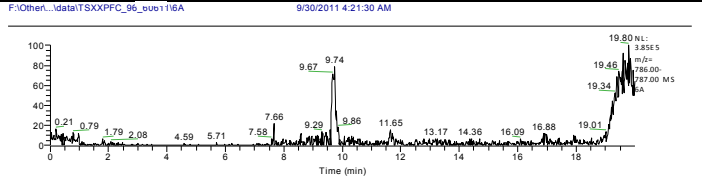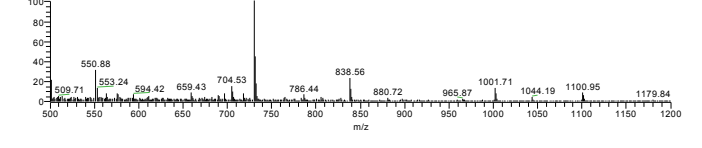

|         |     |                                                                |
|---------|-----|----------------------------------------------------------------|
|         |     | <p>F:\Other_data\TSXXPFC_06_bue1116A 9/30/2011 4:21:30 AM</p>  |
| TSQDPFC | 761 | <p>F:\Other_data\TSXXPFC_06_bue1117A 9/30/2011 9:45:51 AM</p>  |
| TSQGFC  | 703 | <p>F:\Other_data\TSXXPFC_06_bue1117C 9/30/2011 10:39:56 AM</p> |
| TSMFPFC | 778 | <p>F:\Other_data\TSXXPFC_06_bue1117E 9/30/2011 11:34:03 AM</p> |

TSVDFPC 732

+isoprene 800

+2isoprene 868

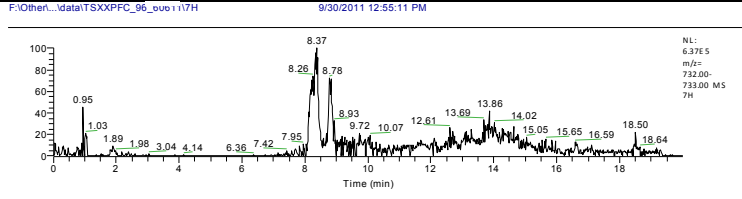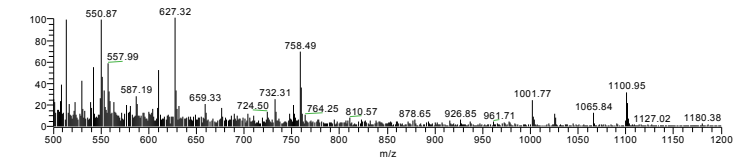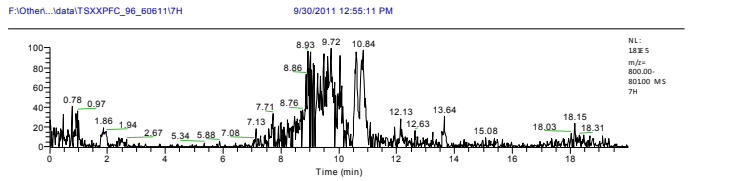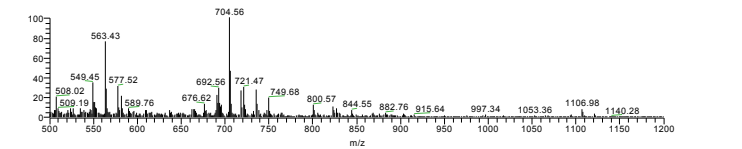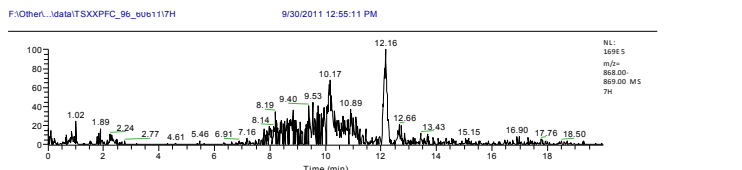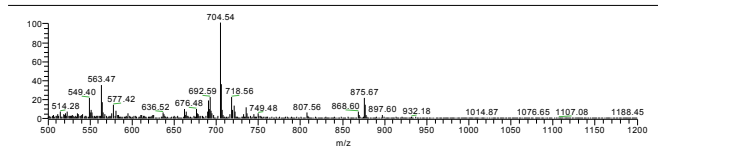

TSESPFC 734

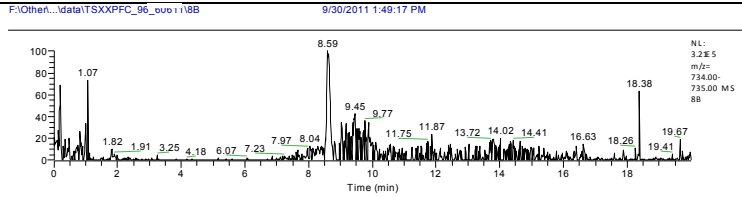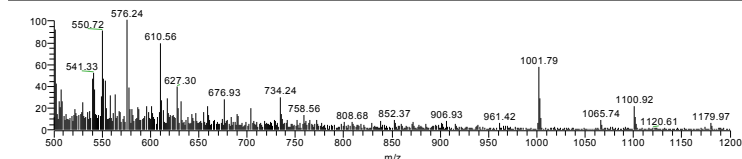



|                                    |                   |                                                                                                                                                    |
|------------------------------------|-------------------|----------------------------------------------------------------------------------------------------------------------------------------------------|
| TSRYPFC                            | 837               | <p>F:\Other...data\TSXXPFC_96_u06118E 9/30/2011 3:10:46 PM</p> <p>Time (min)</p> <p>m/z</p> <p>NL: 3.97E5<br/>m/z: 837.00<br/>838.00 MS<br/>8E</p> |
| TSEFPFC                            | 794               | <p>F:\Other...data\TSXXPFC_96_u06118G 9/30/2011 4:04:52 PM</p> <p>Time (min)</p> <p>m/z</p> <p>NL: 2.5E6<br/>m/z: 794.00<br/>795.00 MS<br/>8G</p>  |
| TSSSPFC<br>+2isoprene              | 828               | <p>F:\Other...data\TSXXPFC_96_u06119A 9/30/2011 4:58:58 PM</p> <p>Time (min)</p> <p>m/z</p> <p>NL: 1.66E5<br/>m/z: 828.00<br/>829.00 MS<br/>9A</p> |
| TSLPPFC<br>+isoprene<br>+2isoprene | 729<br>796<br>864 | <p>F:\Other...data\TSXXPFC_96_u06119C 9/30/2011 5:53:01 PM</p> <p>Time (min)</p> <p>m/z</p> <p>NL: 3.07E6<br/>m/z: 728.00<br/>729.00 MS<br/>9C</p> |

F:\Other...data\TSXXPFC\_06\_bu0119C 9/30/2011 5:53:01 PM

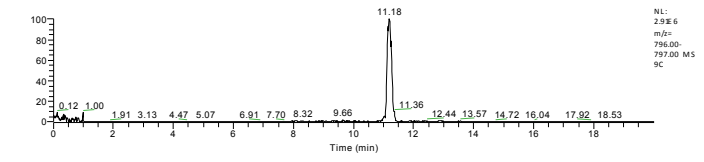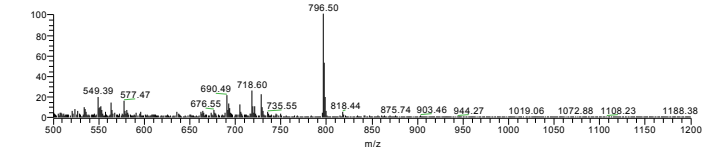

F:\Other...data\TSXXPFC\_06\_bu0119C 9/30/2011 5:53:01 PM

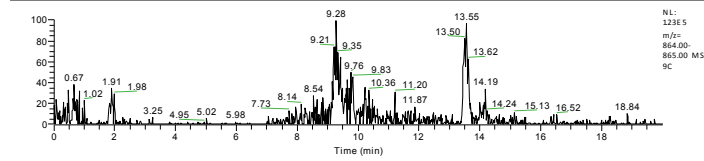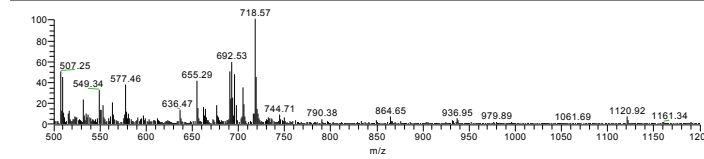

S4D. XSXXPXC

| Sequence               | m/z | Extracted ion chromatogram and mass spectrum at time point                                                                                                                                                                                                                                                                                                                                                           |
|------------------------|-----|----------------------------------------------------------------------------------------------------------------------------------------------------------------------------------------------------------------------------------------------------------------------------------------------------------------------------------------------------------------------------------------------------------------------|
| DSEVPTC<br>(+isoprene) | 782 | <p>F:\Other...data\XSXXPXC_96_12091111G 12/8/2011 6:44:00 PM</p> <p>Chromatogram peaks (min): 0.69, 0.78, 2.70, 2.91, 4.68, 6.13, 7.77, 8.30, 8.45, 8.61, 8.66, 8.80, 9.23, 10.10, 10.67, 11.46, 12.01, 13.04, 13.79, 16.64, 17.38, 19.20</p> <p>Mass spectrum peaks (m/z): 553.35, 577.38, 652.32, 668.39, 746.30, 782.42, 821.62, 856.62, 883.60, 940.10, 966.63, 1028.06, 1084.10, 1172.00</p>                    |
| TSYAPWC                | 791 | <p>F:\Other...data\XSXXPXC_96_12091112B 12/8/2011 8:05:02 PM</p> <p>Chromatogram peaks (min): 0.97, 1.07, 2.39, 2.96, 5.09, 7.25, 8.16, 8.31, 9.16, 9.28, 9.47, 10.96, 11.27, 12.26, 13.90, 13.91, 14.00, 14.17, 15.44, 16.83, 18.89, 19.12</p> <p>Mass spectrum peaks (m/z): 523.52, 589.18, 630.21, 651.70, 704.47, 715.87, 753.08, 791.33, 828.98, 892.98, 943.26, 980.94, 1065.94, 1047.23, 1073.21, 1172.76</p> |
| YSTIPMC<br>(+isoprene) | 778 | <p>F:\Other...data\XSXXPXC_96_12091112G 12/8/2011 10:20:07 PM</p> <p>Chromatogram peaks (min): 0.74, 0.97, 2.77, 2.94, 5.12, 6.46, 7.25, 7.89, 8.93, 9.24, 9.36, 9.60, 10.98, 11.08, 13.90, 14.46, 16.28, 17.88, 18.69</p> <p>Mass spectrum peaks (m/z): 540.35, 575.31, 651.93, 674.26, 704.55, 753.40, 778.37, 794.44, 862.49, 915.91, 907.30, 965.79, 1008.91, 1079.87, 1110.87, 1180.08</p>                      |

|                        |            |                                                                                                                                                                                                                                                                                                                                                                                                                                                                                                                                                                                        |
|------------------------|------------|----------------------------------------------------------------------------------------------------------------------------------------------------------------------------------------------------------------------------------------------------------------------------------------------------------------------------------------------------------------------------------------------------------------------------------------------------------------------------------------------------------------------------------------------------------------------------------------|
|                        |            | <p>F:\Other...data\XSSXPXC_96_12091112G 12/8/2011 10:20:07 PM</p> 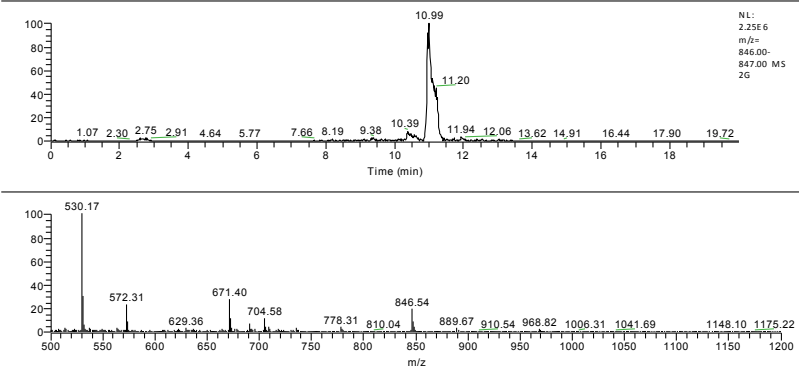 <p>Chromatogram peaks (min): 1.07, 2.30, 2.75, 2.91, 4.64, 5.77, 7.66, 8.19, 9.38, 10.39, 10.99, 11.20, 11.94, 12.06, 13.62, 14.91, 16.44, 17.90, 19.72</p> <p>Mass spectrum peaks (m/z): 530.17, 572.31, 629.36, 671.40, 704.58, 778.31, 810.04, 846.54, 889.67, 910.54, 968.82, 1006.31, 1041.69, 1148.10, 1175.22</p> <p>Parameters: NL: 2.25E6, m/z: 846.00-847.00 MS, 2G</p>                                                 |
| ESADPLC                | 698        | <p>F:\Other...data\XSSXPXC_96_12091114C 12/9/2011 11:51:11 AM</p>  <p>Chromatogram peaks (min): 0.36, 1.02, 1.55, 2.49, 2.60, 6.03, 6.92, 7.75, 8.28, 8.40, 8.45, 8.52, 10.20, 12.78, 13.72, 14.02, 14.19, 14.26, 14.46, 15.22, 16.66, 17.28, 19.65, 19.82</p> <p>Mass spectrum peaks (m/z): 506.00, 524.24, 563.50, 630.35, 677.99, 698.32, 746.61, 721.45, 770.19, 799.39, 859.27, 915.06, 958.34, 1031.68, 1068.19, 1113.69, 1198.28</p> <p>Parameters: NL: 1.46E5, m/z: 698.00-699.00 MS, 1G</p> |
| YSTTPLC<br>(+isoprene) | 748<br>816 | <p>F:\Other...data\XSSXPXC_96_12091114G 12/9/2011 1:39:12 PM</p>  <p>Chromatogram peaks (min): 0.43, 1.00, 2.61, 3.06, 3.34, 5.16, 6.75, 7.59, 8.09, 8.66, 8.93, 10.39, 10.48, 11.66, 13.96, 14.51, 16.92, 18.41, 19.34</p> <p>Mass spectrum peaks (m/z): 524.22, 604.69, 630.14, 704.50, 748.39, 755.40, 821.56, 897.04, 910.89, 915.20, 972.41, 1023.05, 1071.31, 1114.84, 1190.85</p> <p>Parameters: NL: 3.50E6, m/z: 748.00-749.00 MS, 4G</p>                                                  |

|         |     |                                                                                                                                                                                                                                                                                                                                                                                                                                                                                                                                                                                              |
|---------|-----|----------------------------------------------------------------------------------------------------------------------------------------------------------------------------------------------------------------------------------------------------------------------------------------------------------------------------------------------------------------------------------------------------------------------------------------------------------------------------------------------------------------------------------------------------------------------------------------------|
|         |     | <p>F:\Other...data\XSPXPC_96_1209114G 12/9/2011 1:39:12 PM</p> 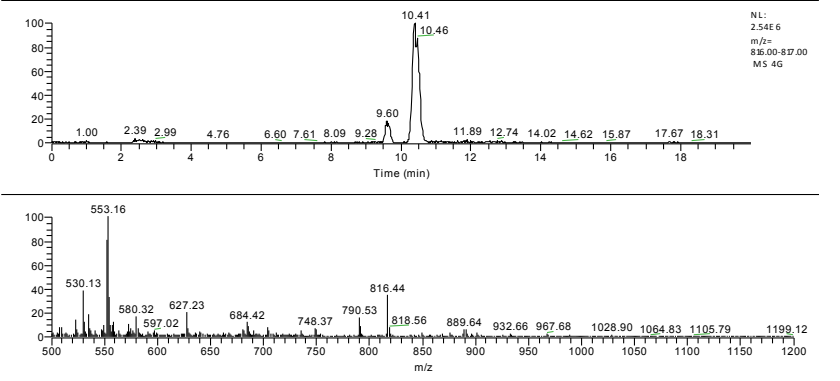 <p>Chromatogram peaks (min): 1.00, 2.39, 2.99, 4.76, 6.60, 7.61, 8.09, 9.28, 9.60, 10.41, 10.46, 11.89, 12.74, 14.02, 14.62, 15.87, 17.67, 18.31</p> <p>Mass spectrum peaks (m/z): 530.13, 553.16, 580.32, 597.02, 627.23, 684.42, 748.37, 790.53, 816.44, 818.56, 889.64, 932.66, 967.68, 1028.90, 1064.83, 1105.79, 1199.12</p> <p>Parameters: NL: 2.54E 6, m/z: 816.00-817.00, MS 4G</p>                                                |
| WSNLPQC | 811 | <p>F:\Other...data\XSPXPC_96_1209115E 12/9/2011 4:21:15 PM</p>  <p>Chromatogram peaks (min): 0.55, 1.50, 1.69, 2.31, 4.01, 5.57, 7.35, 7.70, 8.26, 9.60, 9.69, 11.89, 12.90, 13.48, 15.31, 15.87, 17.57, 18.77</p> <p>Mass spectrum peaks (m/z): 514.50, 576.32, 630.27, 678.40, 746.43, 799.30, 811.40, 817.26, 859.94, 957.51, 984.50, 1052.72, 1095.50, 1138.11, 1198.56</p> <p>Parameters: NL: 1.59E 6, m/z: 811.00-812.00, MS 5E</p>                                                                 |
| VSEAPLC | 682 | <p>F:\Other...data\XSPXPC_96_1209119D 12/12/2011 6:32:45 PM</p>  <p>Chromatogram peaks (min): 0.67, 0.93, 2.22, 3.52, 4.68, 5.59, 7.61, 7.78, 9.07, 9.35, 9.38, 9.60, 10.96, 11.53, 12.99, 13.74, 14.60, 16.04, 17.64, 18.38, 19.89</p> <p>Mass spectrum peaks (m/z): 550.86, 553.27, 588.25, 617.30, 631.34, 659.35, 682.34, 690.51, 758.48, 765.49, 838.60, 880.66, 926.66, 978.77, 1001.77, 1025.84, 1100.92, 1081.02, 1107.92, 1157.94</p> <p>Parameters: NL: 1.29E 6, m/z: 682.00-683.00, MS 9D</p> |

|                |            |                                                                                                                                                                                                                                                                                                                                                                                                                                                                                                                                                                                |
|----------------|------------|--------------------------------------------------------------------------------------------------------------------------------------------------------------------------------------------------------------------------------------------------------------------------------------------------------------------------------------------------------------------------------------------------------------------------------------------------------------------------------------------------------------------------------------------------------------------------------|
| <p>HSTIPLC</p> | <p>734</p> | <p>F:\Other...data\XSSXPXC_96_12091111A 12/13/2011 2:43:38 PM</p> 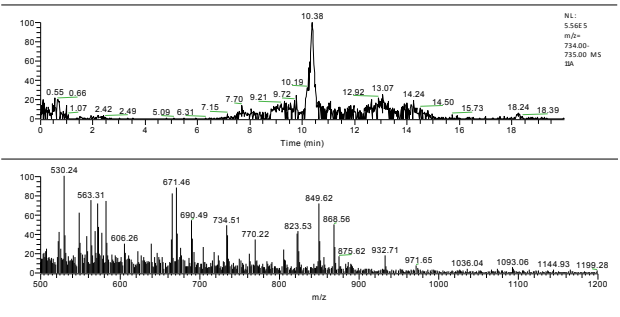 <p>Chromatogram peaks (min): 0.55, 0.66, 1.07, 2.42, 2.49, 5.09, 6.31, 7.15, 7.70, 9.21, 9.72, 10.38, 12.82, 13.07, 14.24, 14.60, 15.73, 18.24, 18.39.</p> <p>Mass spectrum peaks (m/z): 530.24, 563.31, 606.26, 671.46, 690.49, 734.51, 770.22, 823.53, 849.62, 868.56, 875.62, 932.71, 971.65, 1036.04, 1093.06, 1144.93, 1199.28.</p> <p>Metadata: NL: 3.56E5, m/z: 734.00, 735.00 MS, DA</p>                          |
| <p>QSWGPTC</p> | <p>742</p> | <p>F:\Other...data\XSSXPXC_96_12091111B 12/13/2011 3:10:38 PM</p>  <p>Chromatogram peaks (min): 0.31, 0.98, 1.98, 2.49, 3.83, 5.67, 7.13, 7.41, 7.65, 7.61, 7.94, 9.48, 10.51, 10.62, 10.69, 11.37, 13.60, 14.15, 15.91, 16.32, 19.05, 19.12, 19.22, 19.39.</p> <p>Mass spectrum peaks (m/z): 508.12, 575.33, 603.27, 618.30, 652.26, 674.31, 679.07, 742.36, 784.56, 828.55, 880.91, 916.42, 984.60, 1067.19, 1142.25, 1194.20.</p> <p>Metadata: NL: 3.60E5, m/z: 742.00, 743.00 MS, DA</p> |
